# Supplementary material
Source: PubMed Central journal article supplement (PMC3874865)
Supplement: NIHMS532054-supplement-2_si_002.pdf [file NIHMS532054-supplement-2_si_002.pdf]

# **Enantio- and Regioselective CuH-Catalyzed Hydroamination of Alkenes**

**Shaolin Zhu, Nootaree Niljianskul and Stephen L. Buchwald\***

*Department of Chemistry, Massachusetts Institute of Technology, Cambridge,  
Massachusetts 02139, United States*

**Supporting Information: HPLC spectra**

Sample Name: 1-263

S2

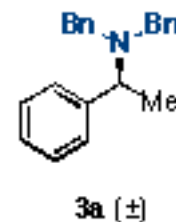

```

=====
Acq. Operator   : SHAOLIN                      Seq. Line :    2
Acq. Instrument : Instrument 1                  Location  : Vial 61
Injection Date  : 7/15/2013 9:39:17 PM        Inj       :    1
                                                    Inj Volume: 5 µl

Acq. Method     : C:\CHEM32\1\DATA\ZHU\HPLC 2013-07-15 21-13-15\AD-H03-30.M
Last changed    : 7/15/2013 9:37:36 PM by SHAOLIN
                  (modified after loading)

Analysis Method : C:\CHEM32\1\METHODS\AD-H20-60ETOH.M
Last changed    : 9/6/2013 7:42:37 PM by SZ
                  (modified after loading)
  
```

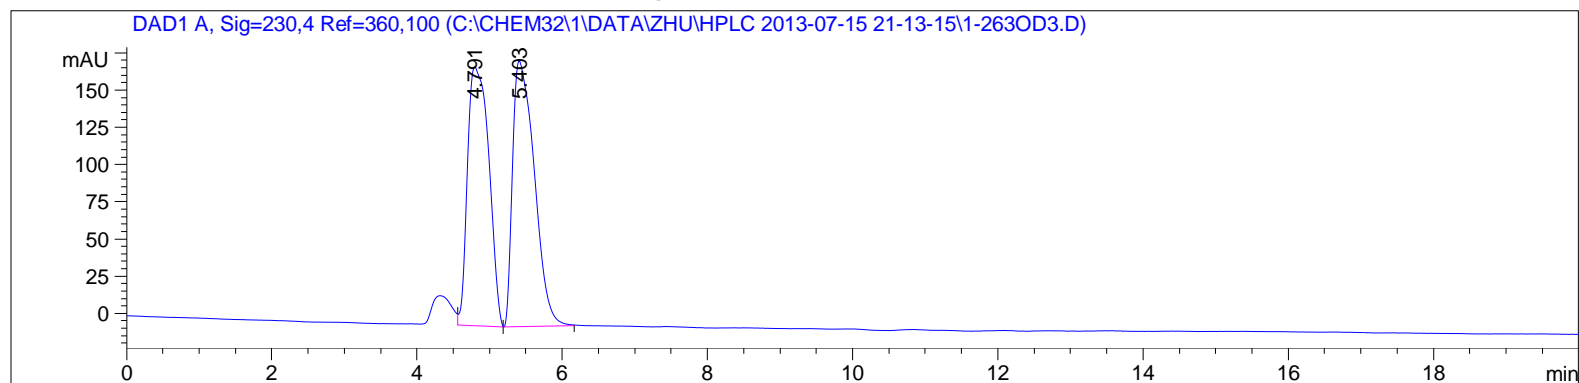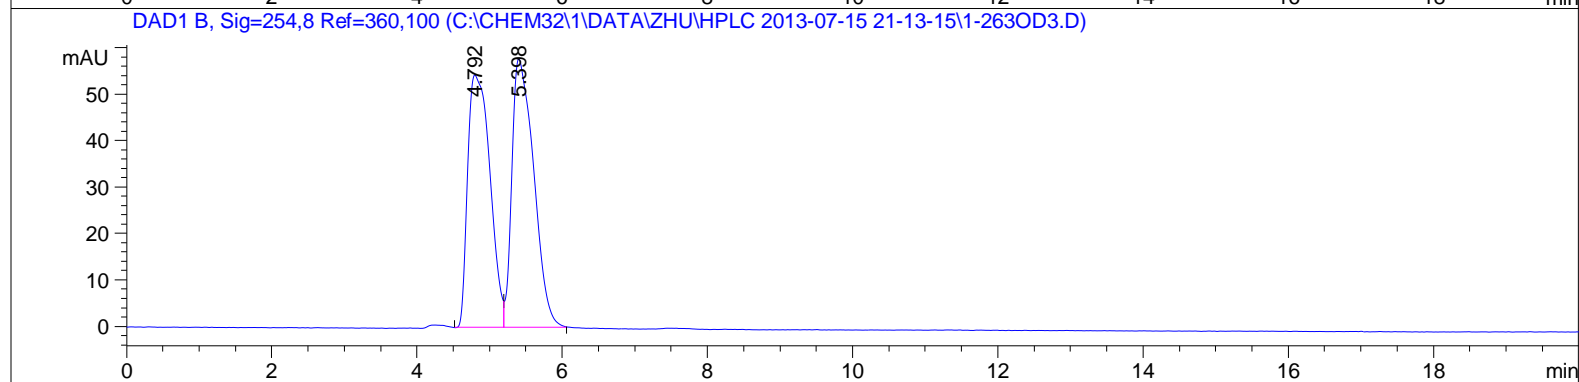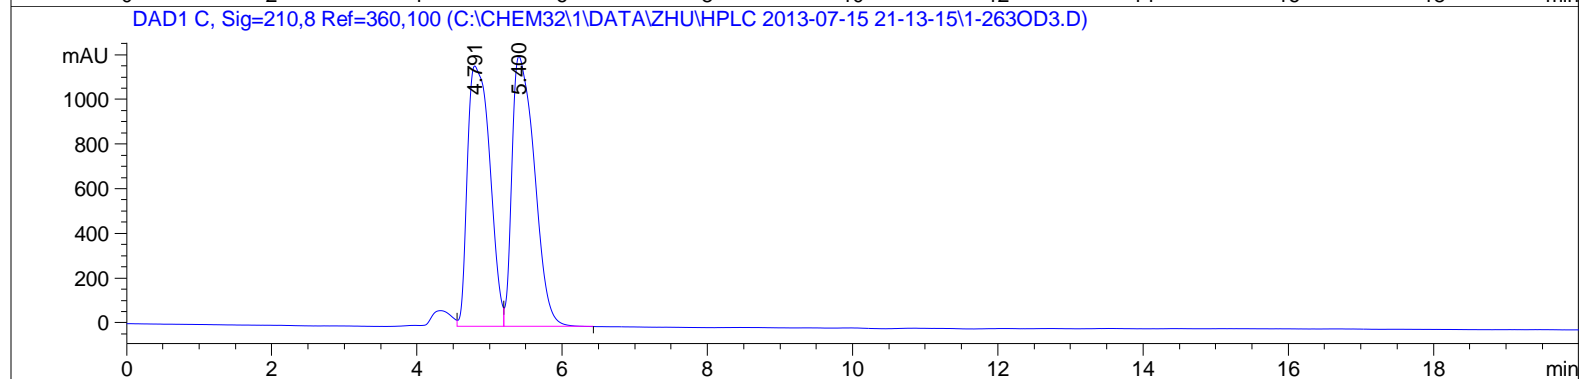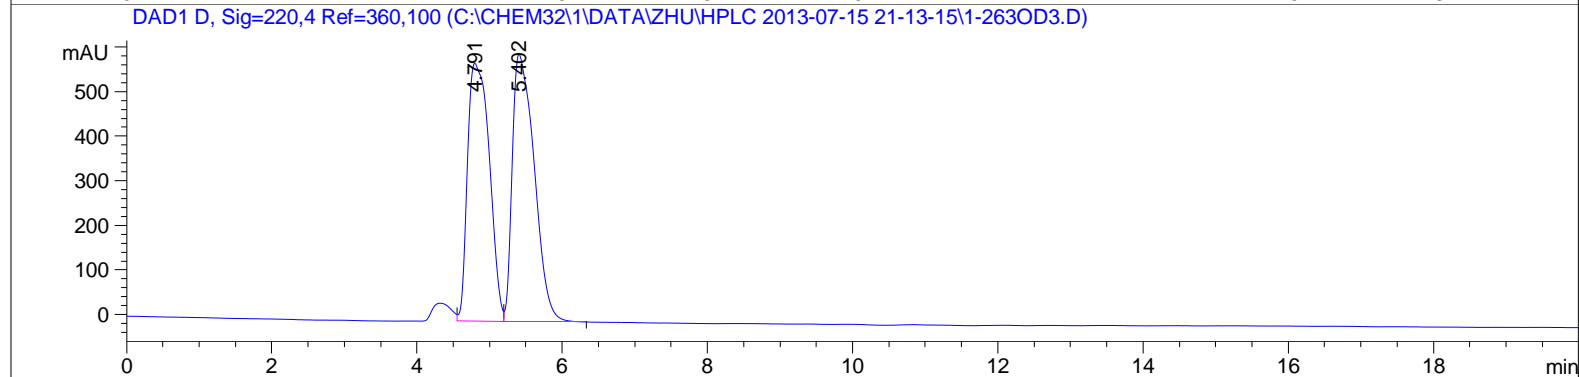

Sample Name: 1-263

## S3

=====  
Area Percent Report  
=====

Sorted By : Signal  
Multiplier: : 1.0000  
Dilution: : 1.0000  
Use Multiplier & Dilution Factor with ISTDs

Signal 1: DAD1 A, Sig=230,4 Ref=360,100

| Peak # | RetTime [min] | Type | Width [min] | Area [mAU*s] | Height [mAU] | Area %  |
|--------|---------------|------|-------------|--------------|--------------|---------|
| 1      | 4.791         | VV   | 0.2825      | 3560.30688   | 174.18317    | 48.9500 |
| 2      | 5.403         | VB   | 0.3406      | 3713.04492   | 178.58705    | 51.0500 |

Totals : 7273.35181 352.77022

Signal 2: DAD1 B, Sig=254,8 Ref=360,100

| Peak # | RetTime [min] | Type | Width [min] | Area [mAU*s] | Height [mAU] | Area %  |
|--------|---------------|------|-------------|--------------|--------------|---------|
| 1      | 4.792         | BV   | 0.2931      | 1162.15771   | 54.42521     | 48.9731 |
| 2      | 5.398         | VB   | 0.2898      | 1210.89734   | 57.94513     | 51.0269 |

Totals : 2373.05505 112.37035

Signal 3: DAD1 C, Sig=210,8 Ref=360,100

| Peak # | RetTime [min] | Type | Width [min] | Area [mAU*s] | Height [mAU] | Area %  |
|--------|---------------|------|-------------|--------------|--------------|---------|
| 1      | 4.791         | VV   | 0.2964      | 2.50385e4    | 1166.43042   | 49.0237 |
| 2      | 5.400         | VB   | 0.3011      | 2.60358e4    | 1209.76929   | 50.9763 |

Totals : 5.10743e4 2376.19971

Signal 4: DAD1 D, Sig=220,4 Ref=360,100

| Peak # | RetTime [min] | Type | Width [min] | Area [mAU*s] | Height [mAU] | Area %  |
|--------|---------------|------|-------------|--------------|--------------|---------|
| 1      | 4.791         | VV   | 0.2876      | 1.20823e4    | 578.67352    | 48.9859 |
| 2      | 5.402         | VB   | 0.2927      | 1.25825e4    | 599.82678    | 51.0141 |

Sample Name: 2-27E

S4

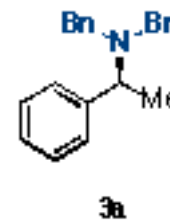

```

=====
Acq. Operator   : RZ                      Seq. Line :    2
Acq. Instrument : Instrument 1             Location  : Vial 61
Injection Date  : 8/6/2013 12:55:02 PM    Inj       :    1
                                           Inj Volume: 5 µl
Different Inj Volume from Sequence !     Actual Inj Volume : 4 µl
Acq. Method    : C:\CHEM32\1\DATA\ZHU\HPLC 2013-08-06 12-21-25\AD-H03-30.M
Last changed   : 8/6/2013 12:59:24 PM by RZ
                                           (modified after loading)
Analysis Method : C:\CHEM32\1\METHODS\AD-H20-60ETOH.M
Last changed   : 9/6/2013 7:42:37 PM by SZ
                                           (modified after loading)
    
```

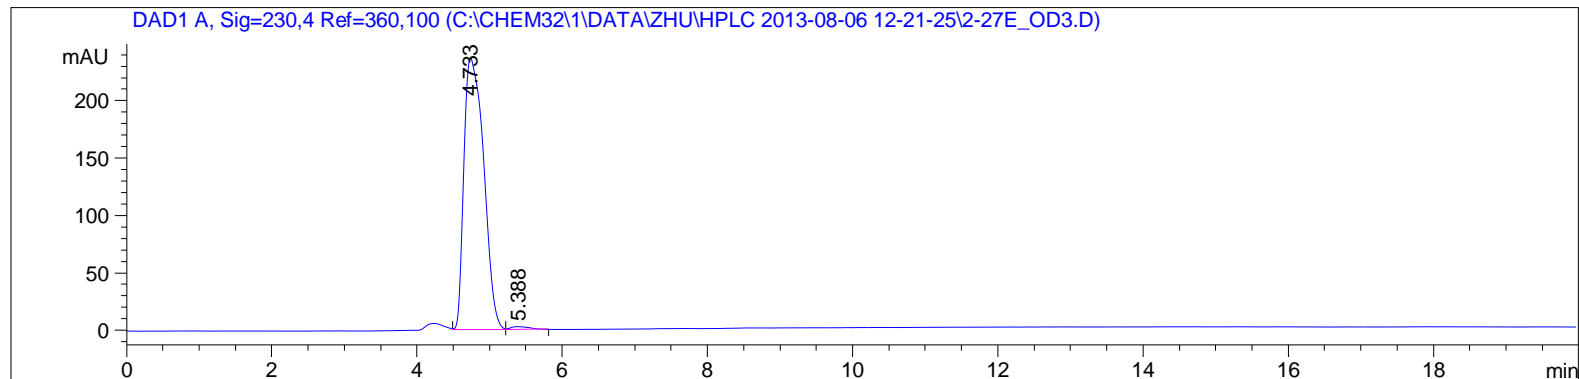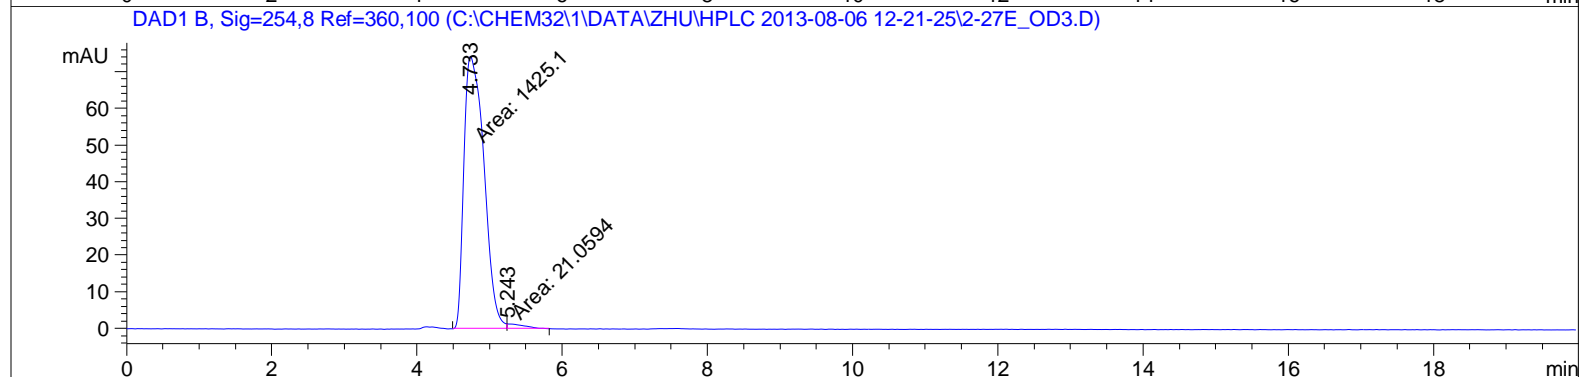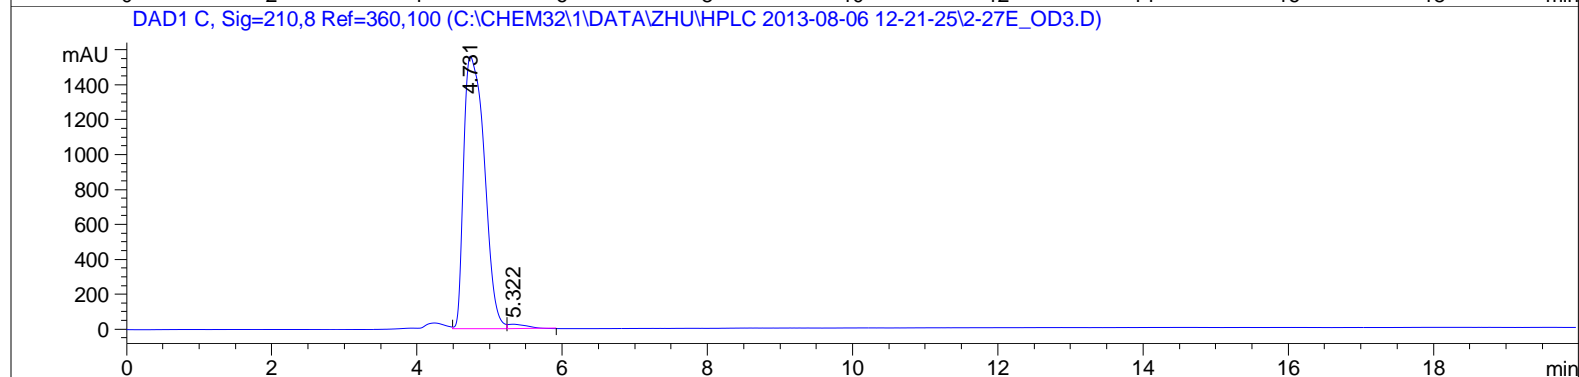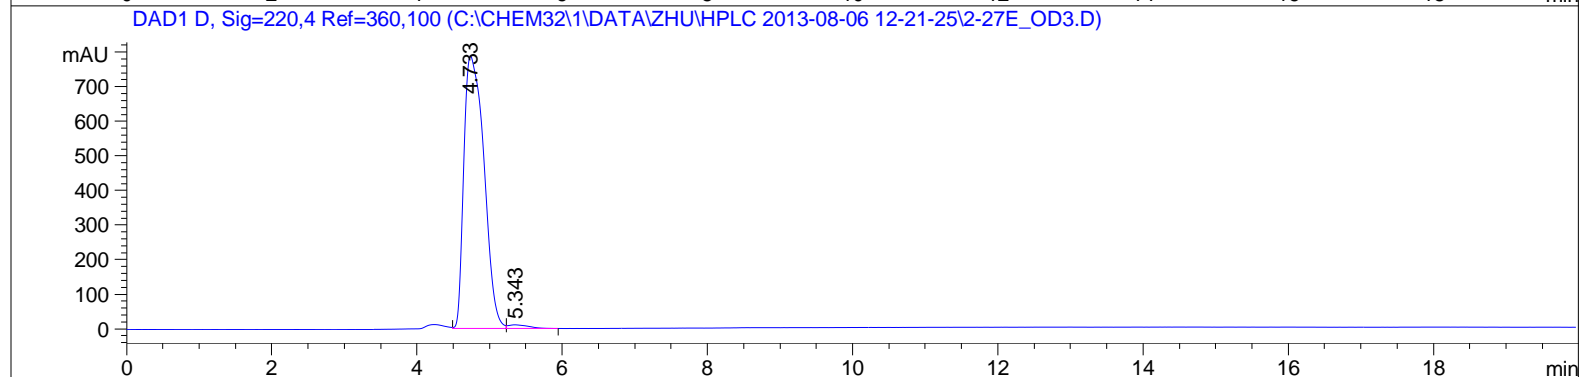

Sample Name: 2-27E

## S5

=====  
Area Percent Report  
=====

Sorted By : Signal  
Multiplier: : 1.0000  
Dilution: : 1.0000  
Use Multiplier & Dilution Factor with ISTDs

Signal 1: DAD1 A, Sig=230,4 Ref=360,100

| Peak # | RetTime [min] | Type | Width [min] | Area [mAU*s] | Height [mAU] | Area %  |
|--------|---------------|------|-------------|--------------|--------------|---------|
| 1      | 4.733         | VV   | 0.2684      | 4479.54980   | 237.15596    | 98.8905 |
| 2      | 5.388         | VB   | 0.2378      | 50.25723     | 2.61964      | 1.1095  |

Totals : 4529.80703 239.77560

Signal 2: DAD1 B, Sig=254,8 Ref=360,100

| Peak # | RetTime [min] | Type | Width [min] | Area [mAU*s] | Height [mAU] | Area %  |
|--------|---------------|------|-------------|--------------|--------------|---------|
| 1      | 4.733         | MF   | 0.3200      | 1425.10229   | 74.21910     | 98.5438 |
| 2      | 5.243         | FM   | 0.2727      | 21.05941     | 1.28721      | 1.4562  |

Totals : 1446.16170 75.50631

Signal 3: DAD1 C, Sig=210,8 Ref=360,100

| Peak # | RetTime [min] | Type | Width [min] | Area [mAU*s] | Height [mAU] | Area %  |
|--------|---------------|------|-------------|--------------|--------------|---------|
| 1      | 4.731         | VV   | 0.2749      | 3.09270e4    | 1562.89551   | 98.4319 |
| 2      | 5.322         | VB   | 0.2529      | 492.67841    | 26.49555     | 1.5681  |

Totals : 3.14197e4 1589.39106

Signal 4: DAD1 D, Sig=220,4 Ref=360,100

| Peak # | RetTime [min] | Type | Width [min] | Area [mAU*s] | Height [mAU] | Area %  |
|--------|---------------|------|-------------|--------------|--------------|---------|
| 1      | 4.733         | VV   | 0.2745      | 1.51902e4    | 789.30701    | 98.5569 |
| 2      | 5.343         | VB   | 0.2649      | 222.42047    | 11.33696     | 1.4431  |

Sample Name: 2-50RAC

S6

=====

|                                                                         |                               |
|-------------------------------------------------------------------------|-------------------------------|
| Acq. Operator : sz                                                      | Seq. Line : 6                 |
| Acq. Instrument : Instrument 1                                          | Location : Vial 63            |
| Injection Date : 9/1/2013 3:59:30 AM                                    | Inj : 1                       |
|                                                                         | Inj Volume : 5 $\mu$ l        |
| Different Inj Volume from Sequence !                                    | Actual Inj Volume : 4 $\mu$ l |
| Acq. Method : C:\CHEM32\1\DATA\ZHU\HPLC 2013-09-01 01-21-20\AD-H05-30.M |                               |
| Last changed : 8/7/2013 11:47:17 AM by RZ                               |                               |
| Analysis Method : C:\CHEM32\1\METHODS\AD-H20-60ETOH.M                   |                               |
| Last changed : 9/6/2013 1:11:38 PM by SZ                                |                               |

(modified after loading)

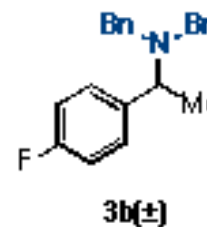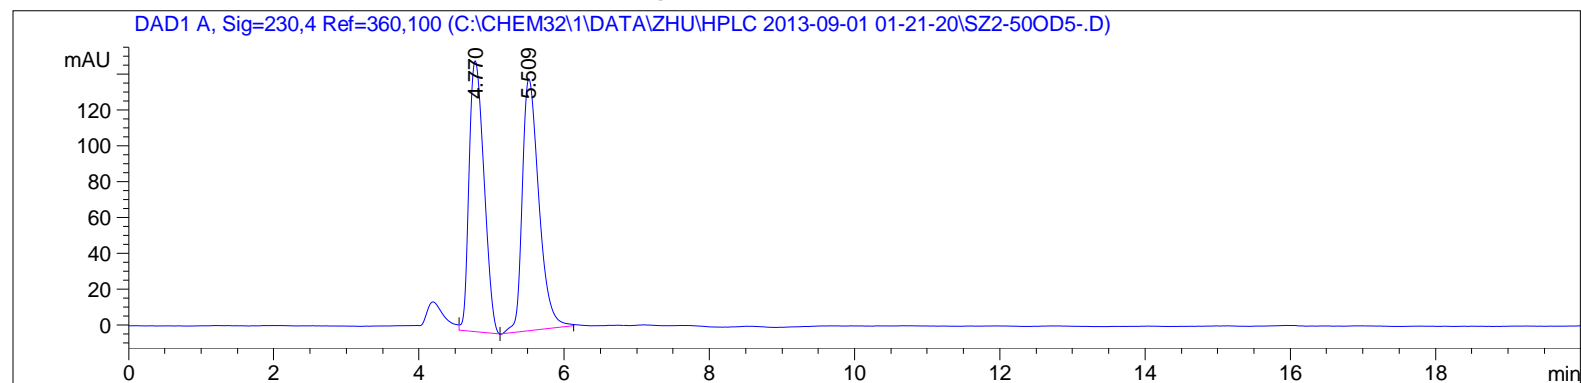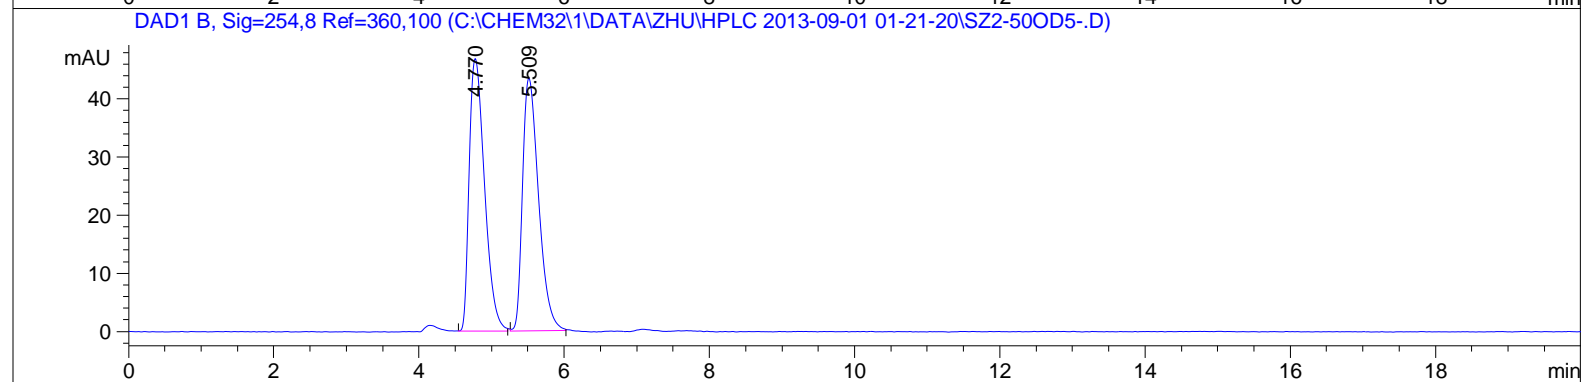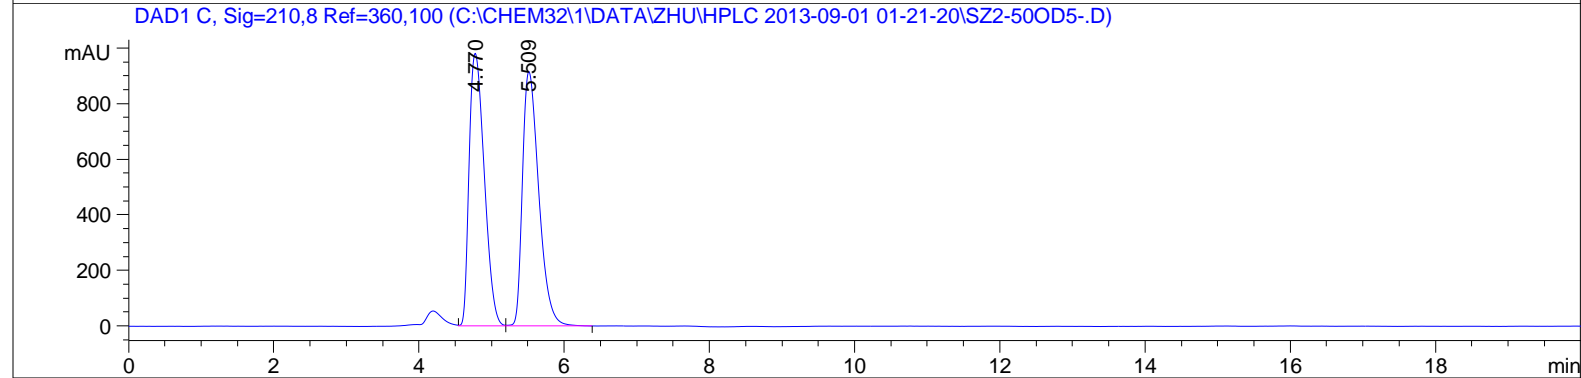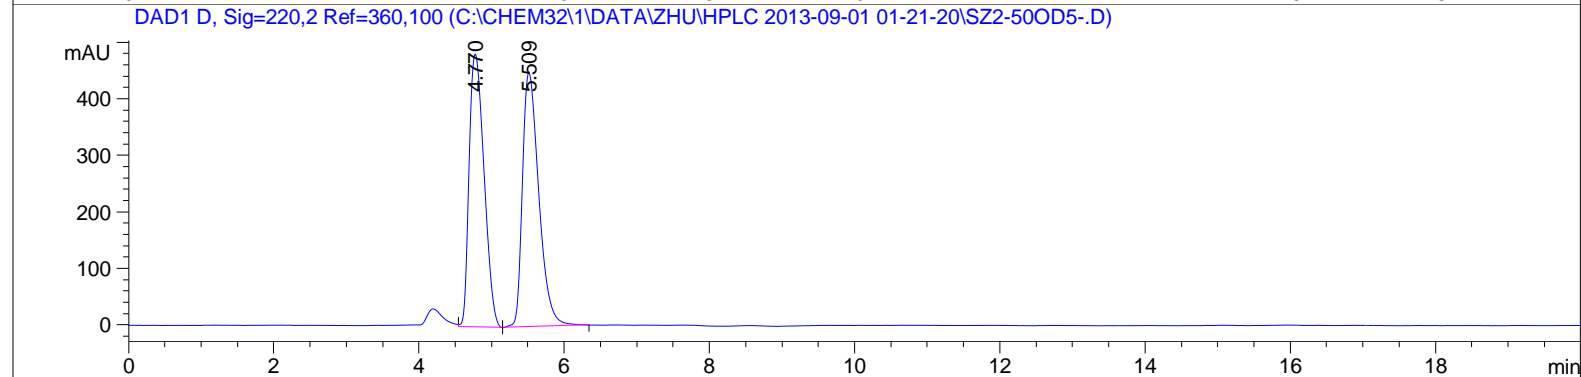

S7

=====  
Area Percent Report  
=====

Sorted By : Signal  
Multiplier: : 1.0000  
Dilution: : 1.0000  
Use Multiplier & Dilution Factor with ISTDs

Signal 1: DAD1 A, Sig=230,4 Ref=360,100

| Peak # | RetTime [min] | Type | Width [min] | Area [mAU*s] | Height [mAU] | Area %  |
|--------|---------------|------|-------------|--------------|--------------|---------|
| 1      | 4.770         | VV   | 0.2281      | 2149.88647   | 151.04256    | 48.8397 |
| 2      | 5.509         | VB   | 0.2468      | 2252.04175   | 140.65727    | 51.1603 |

Totals : 4401.92822 291.69983

Signal 2: DAD1 B, Sig=254,8 Ref=360,100

| Peak # | RetTime [min] | Type | Width [min] | Area [mAU*s] | Height [mAU] | Area %  |
|--------|---------------|------|-------------|--------------|--------------|---------|
| 1      | 4.770         | BB   | 0.2314      | 689.57166    | 46.92942     | 50.7342 |
| 2      | 5.509         | BB   | 0.2395      | 669.61285    | 43.51652     | 49.2658 |

Totals : 1359.18451 90.44594

Signal 3: DAD1 C, Sig=210,8 Ref=360,100

| Peak # | RetTime [min] | Type | Width [min] | Area [mAU*s] | Height [mAU] | Area %  |
|--------|---------------|------|-------------|--------------|--------------|---------|
| 1      | 4.770         | VV   | 0.2313      | 1.42485e4    | 982.05505    | 49.8634 |
| 2      | 5.509         | VB   | 0.2444      | 1.43265e4    | 916.38263    | 50.1366 |

Totals : 2.85750e4 1898.43768

Signal 4: DAD1 D, Sig=220,2 Ref=360,100

| Peak # | RetTime [min] | Type | Width [min] | Area [mAU*s] | Height [mAU] | Area %  |
|--------|---------------|------|-------------|--------------|--------------|---------|
| 1      | 4.770         | VV   | 0.2285      | 6886.47021   | 482.64758    | 49.3136 |
| 2      | 5.509         | VB   | 0.2435      | 7078.18701   | 449.98068    | 50.6864 |

Sample Name: 2-145

S8

=====

|                                      |                                                             |                   |           |
|--------------------------------------|-------------------------------------------------------------|-------------------|-----------|
| Acq. Operator                        | : sz                                                        | Seq. Line         | : 4       |
| Acq. Instrument                      | : Instrument 1                                              | Location          | : Vial 62 |
| Injection Date                       | : 9/1/2013 2:56:41 AM                                       | Inj               | : 1       |
|                                      |                                                             | Inj Volume        | : 5 µl    |
| Different Inj Volume from Sequence ! |                                                             | Actual Inj Volume | : 4 µl    |
| Acq. Method                          | : C:\CHEM32\1\DATA\ZHU\HPLC 2013-09-01 01-21-20\AD-H05-30.M |                   |           |
| Last changed                         | : 8/7/2013 11:47:17 AM by RZ                                |                   |           |
| Analysis Method                      | : C:\CHEM32\1\METHODS\AD-H20-60ETOH.M                       |                   |           |
| Last changed                         | : 9/6/2013 1:11:38 PM by SZ                                 |                   |           |
|                                      | (modified after loading)                                    |                   |           |

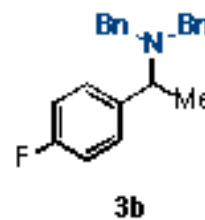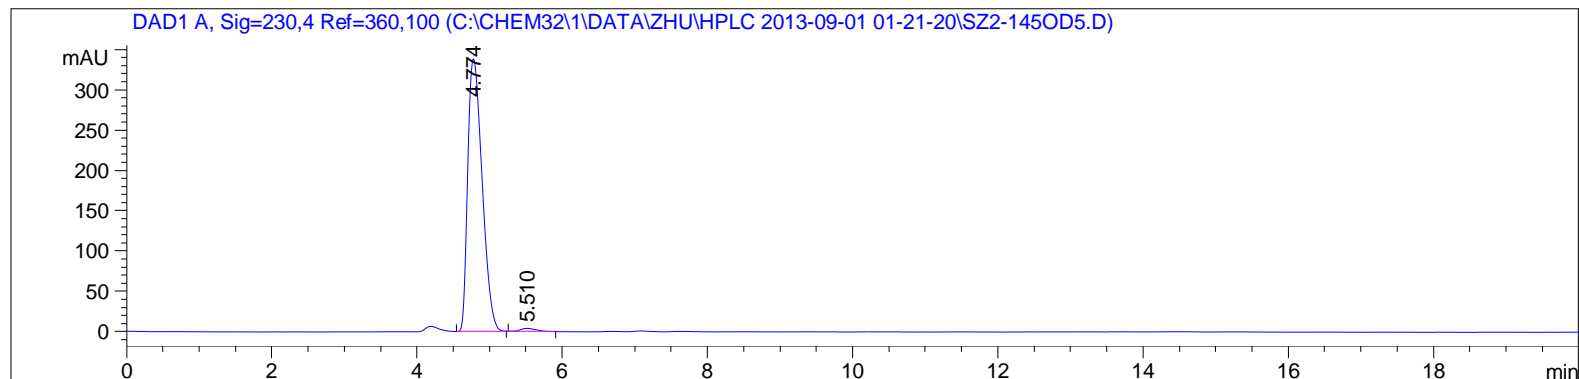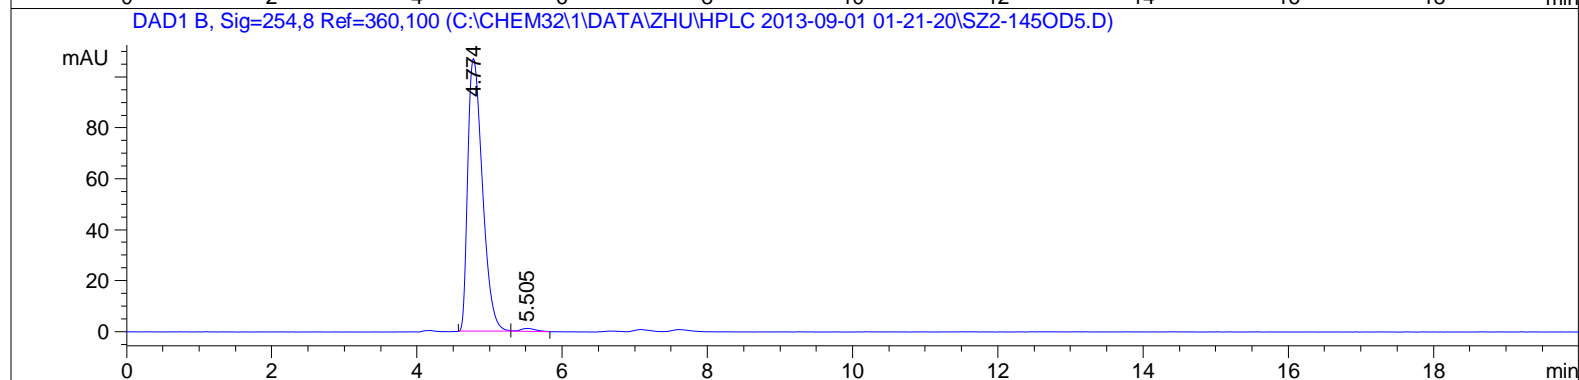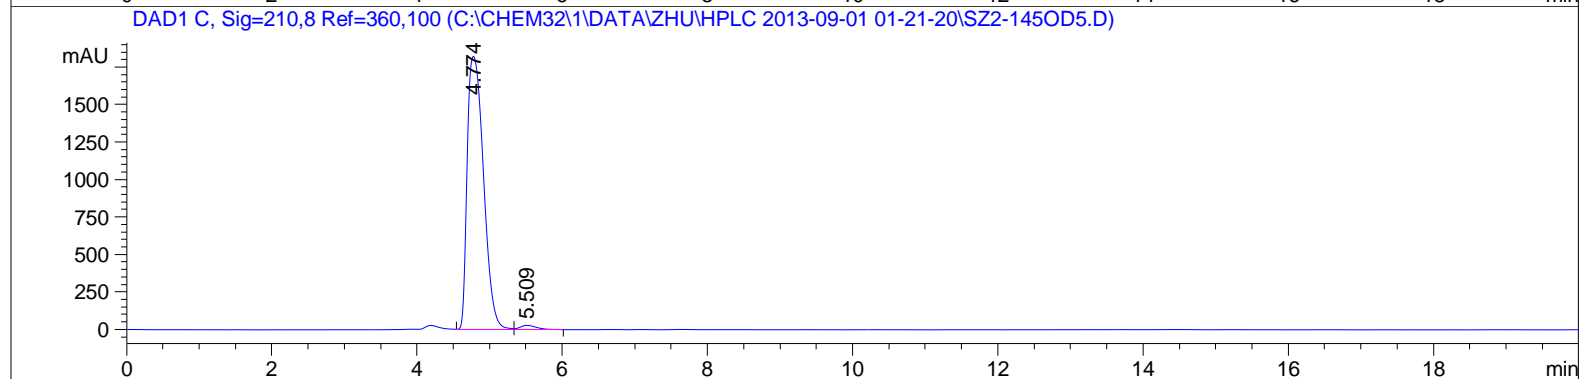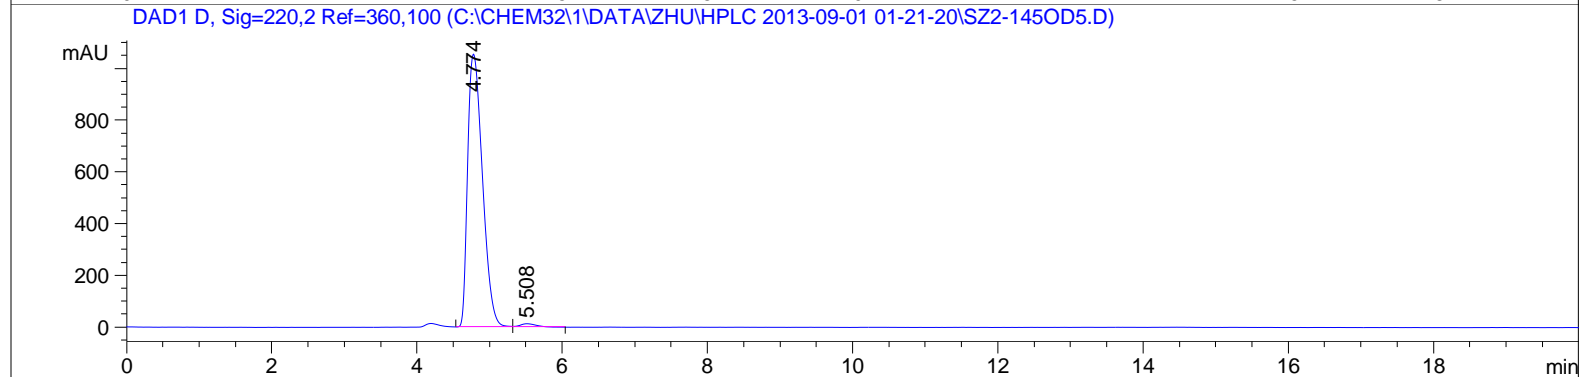



Sample Name: 2-145

## S9

=====  
Area Percent Report  
=====

Sorted By : Signal  
Multiplier: : 1.0000  
Dilution: : 1.0000  
Use Multiplier & Dilution Factor with ISTDs

Signal 1: DAD1 A, Sig=230,4 Ref=360,100

| Peak # | RetTime [min] | Type | Width [min] | Area [mAU*s] | Height [mAU] | Area %  |
|--------|---------------|------|-------------|--------------|--------------|---------|
| 1      | 4.774         | VB   | 0.2188      | 4664.47070   | 338.51404    | 98.5342 |
| 2      | 5.510         | BB   | 0.2377      | 69.38777     | 4.13758      | 1.4658  |

Totals : 4733.85847 342.65162

Signal 2: DAD1 B, Sig=254,8 Ref=360,100

| Peak # | RetTime [min] | Type | Width [min] | Area [mAU*s] | Height [mAU] | Area %  |
|--------|---------------|------|-------------|--------------|--------------|---------|
| 1      | 4.774         | BB   | 0.2202      | 1508.68457   | 107.20237    | 98.6565 |
| 2      | 5.505         | BB   | 0.2189      | 20.54478     | 1.28252      | 1.3435  |

Totals : 1529.22935 108.48489

Signal 3: DAD1 C, Sig=210,8 Ref=360,100

| Peak # | RetTime [min] | Type | Width [min] | Area [mAU*s] | Height [mAU] | Area %  |
|--------|---------------|------|-------------|--------------|--------------|---------|
| 1      | 4.774         | VV   | 0.2520      | 2.84310e4    | 1822.87952   | 98.3950 |
| 2      | 5.509         | VB   | 0.2429      | 463.77542    | 28.63951     | 1.6050  |

Totals : 2.88948e4 1851.51903

Signal 4: DAD1 D, Sig=220,2 Ref=360,100

| Peak # | RetTime [min] | Type | Width [min] | Area [mAU*s] | Height [mAU] | Area %  |
|--------|---------------|------|-------------|--------------|--------------|---------|
| 1      | 4.774         | VV   | 0.2255      | 1.49723e4    | 1055.58362   | 98.5591 |
| 2      | 5.508         | VB   | 0.2452      | 218.88734    | 13.35889     | 1.4409  |

Sample Name: 2-31rac

## S10

=====

|                                      |                                                             |                   |           |
|--------------------------------------|-------------------------------------------------------------|-------------------|-----------|
| Acq. Operator                        | : SZ                                                        | Seq. Line         | : 8       |
| Acq. Instrument                      | : Instrument 1                                              | Location          | : Vial 64 |
| Injection Date                       | : 8/15/2013 2:56:14 PM                                      | Inj               | : 1       |
|                                      |                                                             | Inj Volume        | : 5 µl    |
| Different Inj Volume from Sequence ! |                                                             | Actual Inj Volume | : 4 µl    |
| Acq. Method                          | : C:\CHEM32\1\DATA\ZHU\HPLC 2013-08-15 11-14-59\AD-H03-30.M |                   |           |
| Last changed                         | : 7/15/2013 8:52:24 PM by SHU                               |                   |           |
| Analysis Method                      | : C:\CHEM32\1\METHODS\AD-H20-60ETOH.M                       |                   |           |
| Last changed                         | : 9/6/2013 1:11:38 PM by SZ                                 |                   |           |
|                                      | (modified after loading)                                    |                   |           |

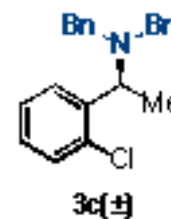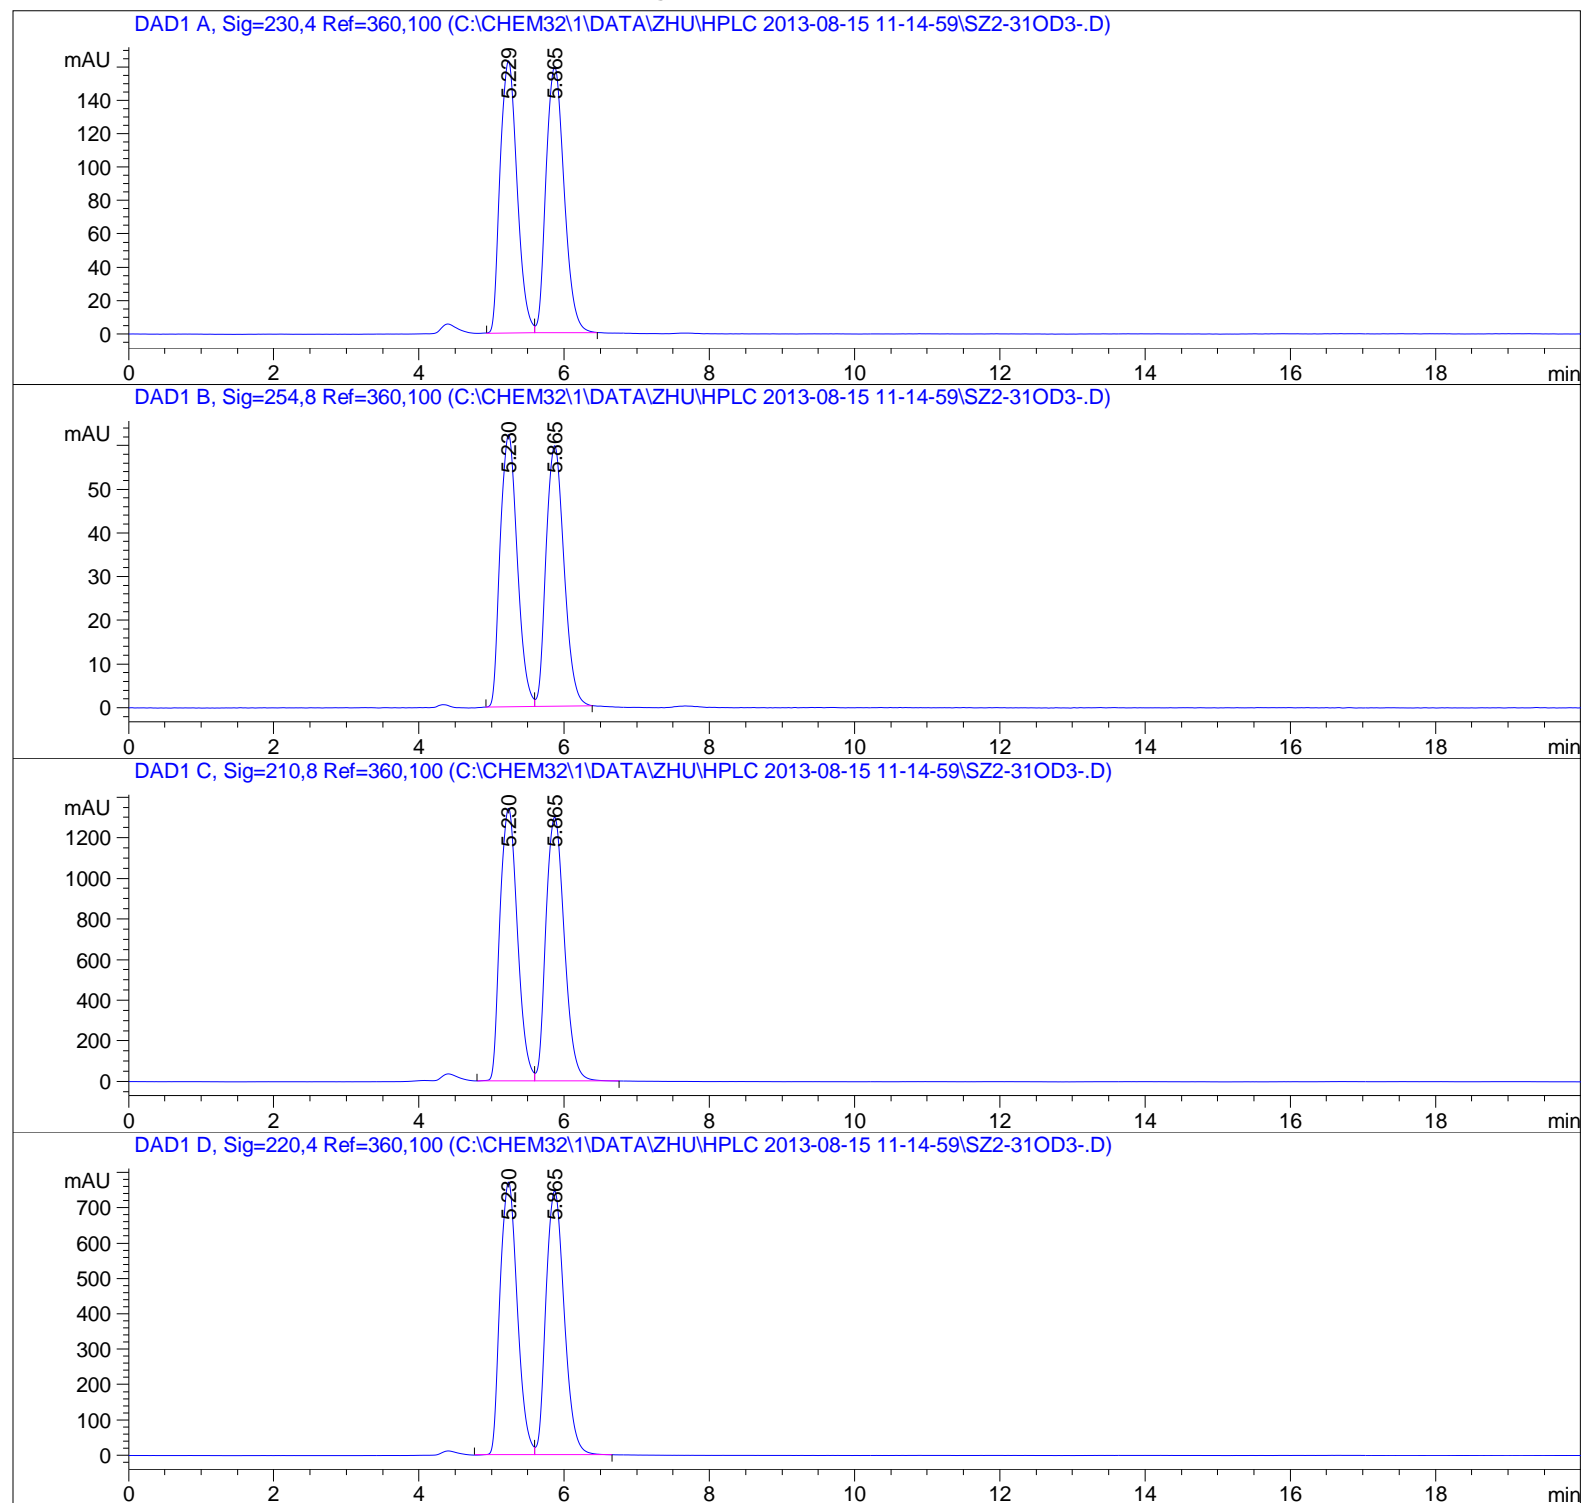

# S11

=====  
Area Percent Report  
=====

Sorted By : Signal  
Multiplier: : 1.0000  
Dilution: : 1.0000  
Use Multiplier & Dilution Factor with ISTDs

Signal 1: DAD1 A, Sig=230,4 Ref=360,100

| Peak # | RetTime [min] | Type | Width [min] | Area [mAU*s] | Height [mAU] | Area %  |
|--------|---------------|------|-------------|--------------|--------------|---------|
| 1      | 5.229         | BV   | 0.2634      | 2656.13452   | 163.59393    | 48.8958 |
| 2      | 5.865         | VB   | 0.2764      | 2776.10547   | 160.01079    | 51.1042 |

Totals : 5432.23999 323.60472

Signal 2: DAD1 B, Sig=254,8 Ref=360,100

| Peak # | RetTime [min] | Type | Width [min] | Area [mAU*s] | Height [mAU] | Area %  |
|--------|---------------|------|-------------|--------------|--------------|---------|
| 1      | 5.230         | BV   | 0.2645      | 1018.62762   | 62.36912     | 49.7150 |
| 2      | 5.865         | VB   | 0.2753      | 1030.30859   | 59.71028     | 50.2850 |

Totals : 2048.93622 122.07940

Signal 3: DAD1 C, Sig=210,8 Ref=360,100

| Peak # | RetTime [min] | Type | Width [min] | Area [mAU*s] | Height [mAU] | Area %  |
|--------|---------------|------|-------------|--------------|--------------|---------|
| 1      | 5.230         | VV   | 0.2704      | 2.24106e4    | 1344.60706   | 49.3833 |
| 2      | 5.865         | VB   | 0.2820      | 2.29703e4    | 1300.78674   | 50.6167 |

Totals : 4.53809e4 2645.39380

Signal 4: DAD1 D, Sig=220,4 Ref=360,100

| Peak # | RetTime [min] | Type | Width [min] | Area [mAU*s] | Height [mAU] | Area %  |
|--------|---------------|------|-------------|--------------|--------------|---------|
| 1      | 5.230         | VV   | 0.2657      | 1.26919e4    | 772.27026    | 49.2844 |
| 2      | 5.865         | VB   | 0.2799      | 1.30605e4    | 747.18628    | 50.7156 |

Sample Name: 2-59

## S12

=====

|                                                                         |                          |
|-------------------------------------------------------------------------|--------------------------|
| Acq. Operator : SZ                                                      | Seq. Line : 6            |
| Acq. Instrument : Instrument 1                                          | Location : Vial 63       |
| Injection Date : 8/15/2013 1:53:31 PM                                   | Inj : 1                  |
|                                                                         | Inj Volume : 5 µl        |
| Different Inj Volume from Sequence !                                    | Actual Inj Volume : 4 µl |
| Acq. Method : C:\CHEM32\1\DATA\ZHU\HPLC 2013-08-15 11-14-59\AD-H03-30.M |                          |
| Last changed : 7/15/2013 8:52:24 PM by SHU                              |                          |
| Analysis Method : C:\CHEM32\1\METHODS\AD-H20-60ETOH.M                   |                          |
| Last changed : 9/6/2013 1:11:38 PM by SZ                                |                          |

(modified after loading)

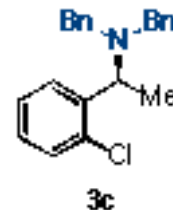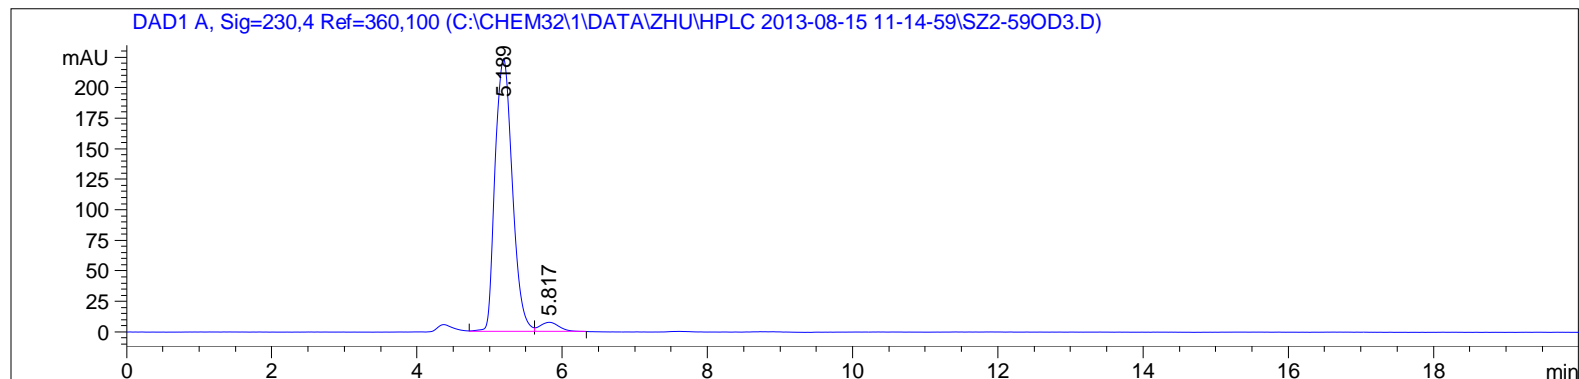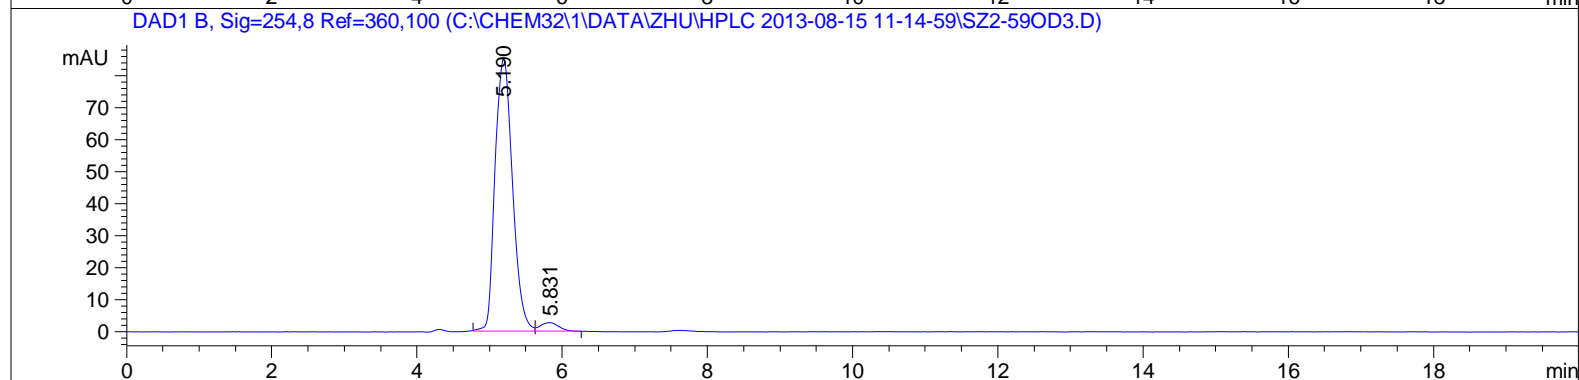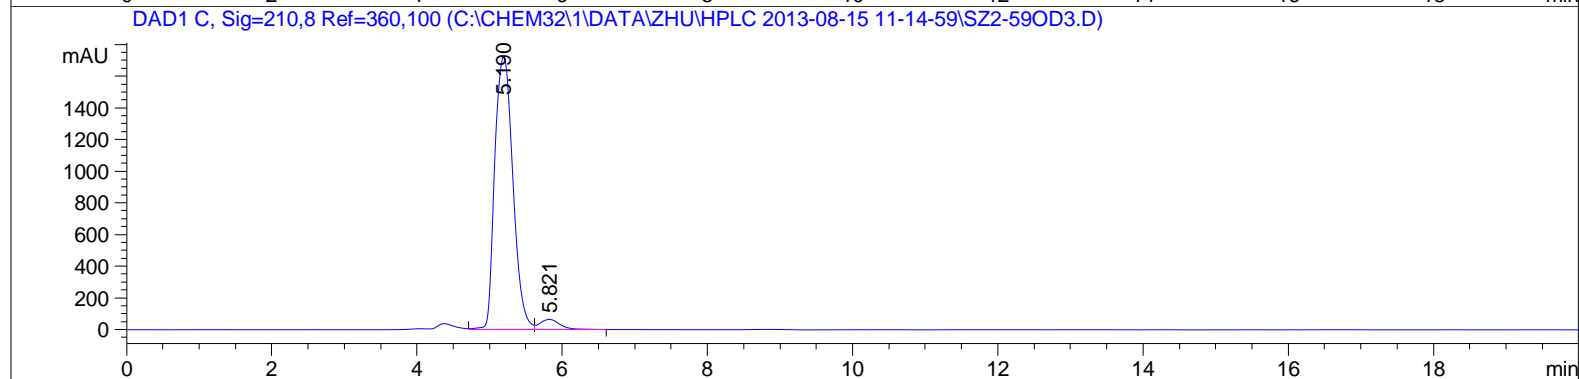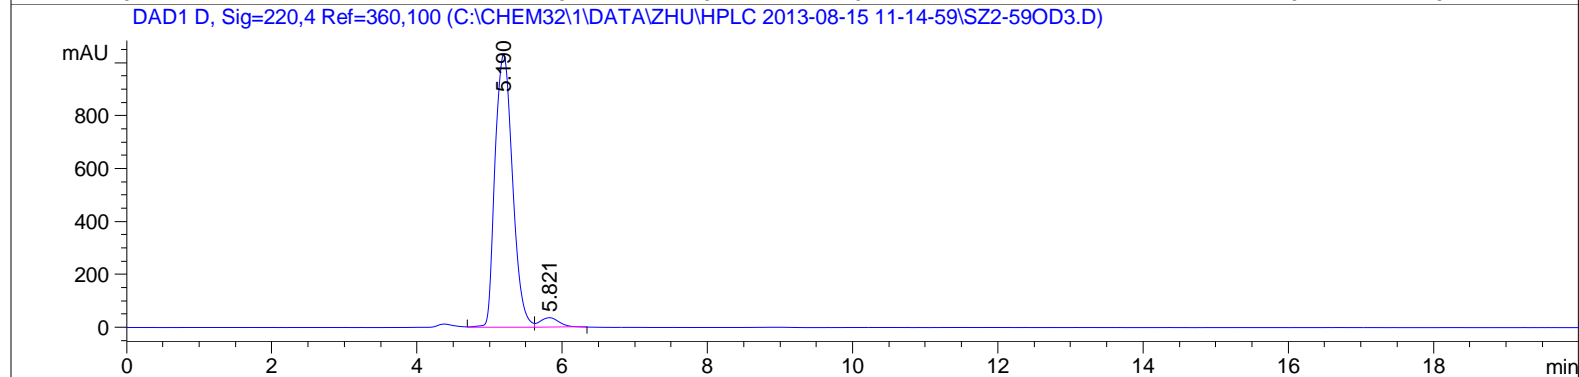

Sample Name: 2-59

## S13

=====  
Area Percent Report  
=====

Sorted By : Signal  
Multiplier: : 1.0000  
Dilution: : 1.0000  
Use Multiplier & Dilution Factor with ISTDs

Signal 1: DAD1 A, Sig=230,4 Ref=360,100

| Peak # | RetTime [min] | Type | Width [min] | Area [mAU*s] | Height [mAU] | Area %  |
|--------|---------------|------|-------------|--------------|--------------|---------|
| 1      | 5.189         | VV   | 0.2655      | 3707.01343   | 223.51379    | 96.2041 |
| 2      | 5.817         | VB   | 0.2882      | 146.26677    | 7.74800      | 3.7959  |

Totals : 3853.28020 231.26179

Signal 2: DAD1 B, Sig=254,8 Ref=360,100

| Peak # | RetTime [min] | Type | Width [min] | Area [mAU*s] | Height [mAU] | Area %  |
|--------|---------------|------|-------------|--------------|--------------|---------|
| 1      | 5.190         | BV   | 0.2671      | 1423.92590   | 85.15365     | 96.6429 |
| 2      | 5.831         | VB   | 0.2743      | 49.46318     | 2.74400      | 3.3571  |

Totals : 1473.38908 87.89765

Signal 3: DAD1 C, Sig=210,8 Ref=360,100

| Peak # | RetTime [min] | Type | Width [min] | Area [mAU*s] | Height [mAU] | Area %  |
|--------|---------------|------|-------------|--------------|--------------|---------|
| 1      | 5.190         | VV   | 0.2825      | 2.99501e4    | 1725.35486   | 95.9819 |
| 2      | 5.821         | VB   | 0.2988      | 1253.80298   | 64.50181     | 4.0181  |

Totals : 3.12039e4 1789.85667

Signal 4: DAD1 D, Sig=220,4 Ref=360,100

| Peak # | RetTime [min] | Type | Width [min] | Area [mAU*s] | Height [mAU] | Area %  |
|--------|---------------|------|-------------|--------------|--------------|---------|
| 1      | 5.190         | VV   | 0.2713      | 1.72853e4    | 1032.45752   | 96.2563 |
| 2      | 5.821         | VB   | 0.2900      | 672.28064    | 35.97680     | 3.7437  |

Sample Name: 2-29RAC

## S14

```

=====
Acq. Operator   : SZ                               Seq. Line :   14
Acq. Instrument : Instrument 1                     Location  : Vial 64
Injection Date  : 9/4/2013 7:18:30 AM             Inj       :    1
                                                    Inj Volume: 5 µl
Different Inj Volume from Sequence !      Actual Inj Volume : 4 µl
Acq. Method    : C:\CHEM32\1\DATA\ZHU\HPLC 2013-09-04 00-38-29\AD-H03-30.M
Last changed   : 7/15/2013 8:52:24 PM by SHU
Analysis Method: C:\CHEM32\1\METHODS\AD-H20-60ETOH.M
Last changed   : 9/6/2013 1:11:38 PM by SZ
                (modified after loading)
  
```

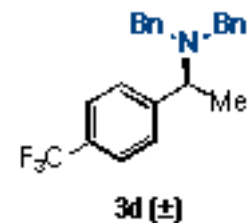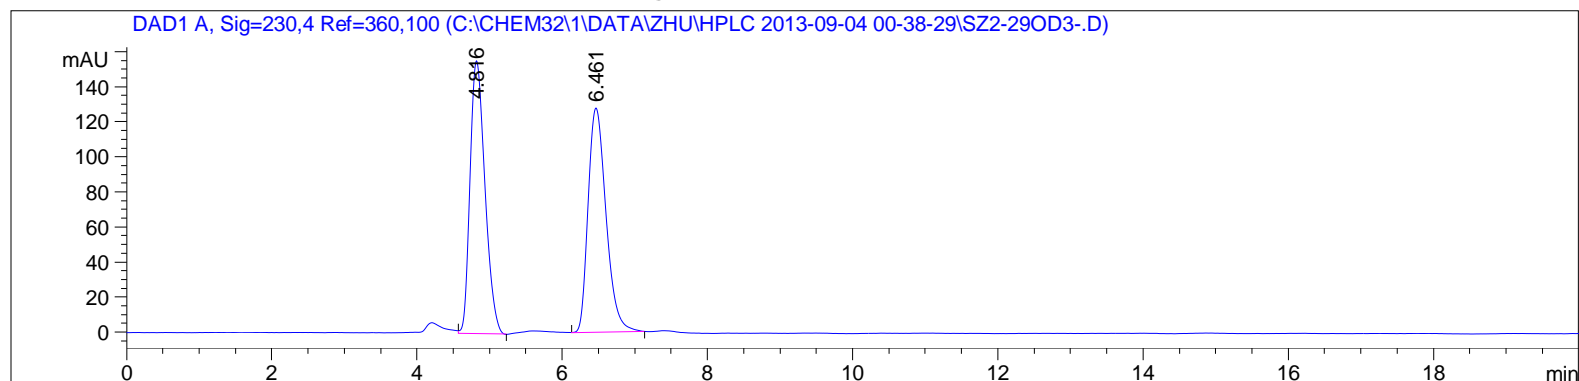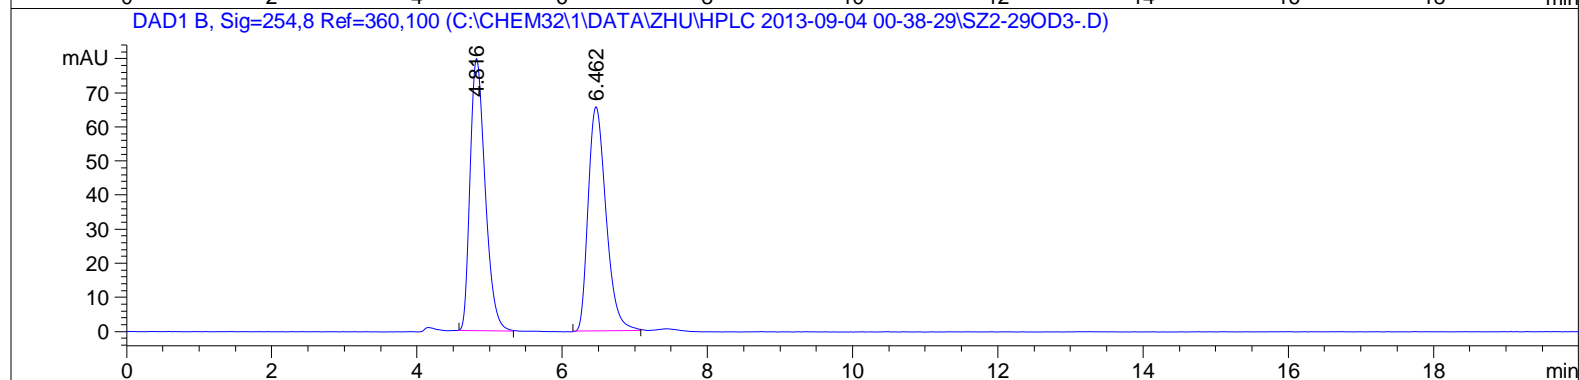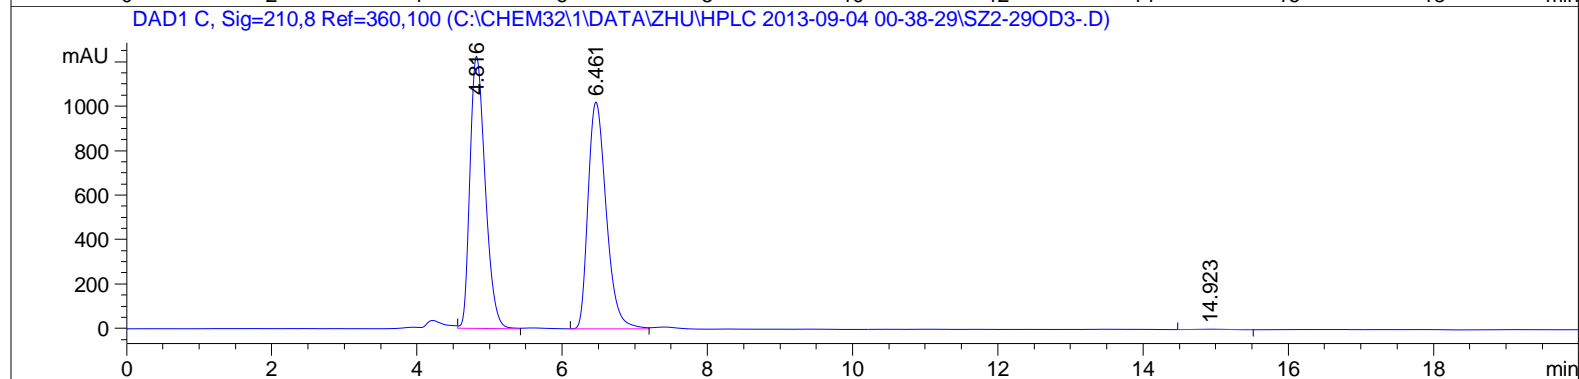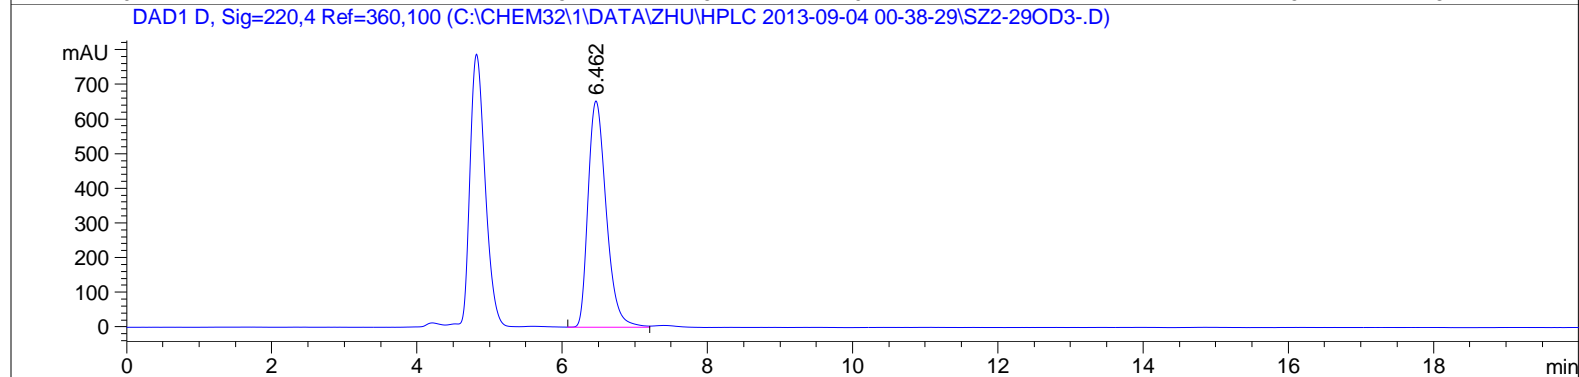

### S15

=====  
Area Percent Report  
=====

Sorted By : Signal  
Multiplier: : 1.0000  
Dilution: : 1.0000  
Use Multiplier & Dilution Factor with ISTDs

Signal 1: DAD1 A, Sig=230,4 Ref=360,100

| Peak # | RetTime [min] | Type | Width [min] | Area [mAU*s] | Height [mAU] | Area %  |
|--------|---------------|------|-------------|--------------|--------------|---------|
| 1      | 4.816         | VV   | 0.2247      | 2224.15674   | 155.65816    | 50.2380 |
| 2      | 6.461         | BB   | 0.2686      | 2203.08594   | 128.12843    | 49.7620 |

Totals : 4427.24268 283.78659

Signal 2: DAD1 B, Sig=254,8 Ref=360,100

| Peak # | RetTime [min] | Type | Width [min] | Area [mAU*s] | Height [mAU] | Area %  |
|--------|---------------|------|-------------|--------------|--------------|---------|
| 1      | 4.816         | BB   | 0.2241      | 1150.32434   | 79.83385     | 50.4896 |
| 2      | 6.462         | BB   | 0.2659      | 1128.01599   | 65.84871     | 49.5104 |

Totals : 2278.34033 145.68256

Signal 3: DAD1 C, Sig=210,8 Ref=360,100

| Peak # | RetTime [min] | Type | Width [min] | Area [mAU*s] | Height [mAU] | Area %  |
|--------|---------------|------|-------------|--------------|--------------|---------|
| 1      | 4.816         | VB   | 0.2286      | 1.79337e4    | 1226.34082   | 50.0927 |
| 2      | 6.461         | BV   | 0.2715      | 1.78182e4    | 1021.42981   | 49.7701 |
| 3      | 14.923        | BB   | 0.3320      | 49.10438     | 1.79023      | 0.1372  |

Totals : 3.58010e4 2249.56086

Signal 4: DAD1 D, Sig=220,4 Ref=360,100

Sample Name: 2-102

## S16

```
=====
Acq. Operator   : SZ                               Seq. Line :   12
Acq. Instrument : Instrument 1                     Location  : Vial 63
Injection Date  : 9/4/2013 6:15:41 AM             Inj       :    1
                                                    Inj Volume: 5 µl
Different Inj Volume from Sequence !      Actual Inj Volume: 4 µl
Acq. Method    : C:\CHEM32\1\DATA\ZHU\HPLC 2013-09-04 00-38-29\AD-H03-30.M
Last changed   : 7/15/2013 8:52:24 PM by SHU
Analysis Method : C:\CHEM32\1\METHODS\AD-H20-60ETOH.M
Last changed   : 9/6/2013 1:11:38 PM by SZ
                (modified after loading)
```

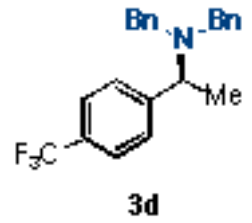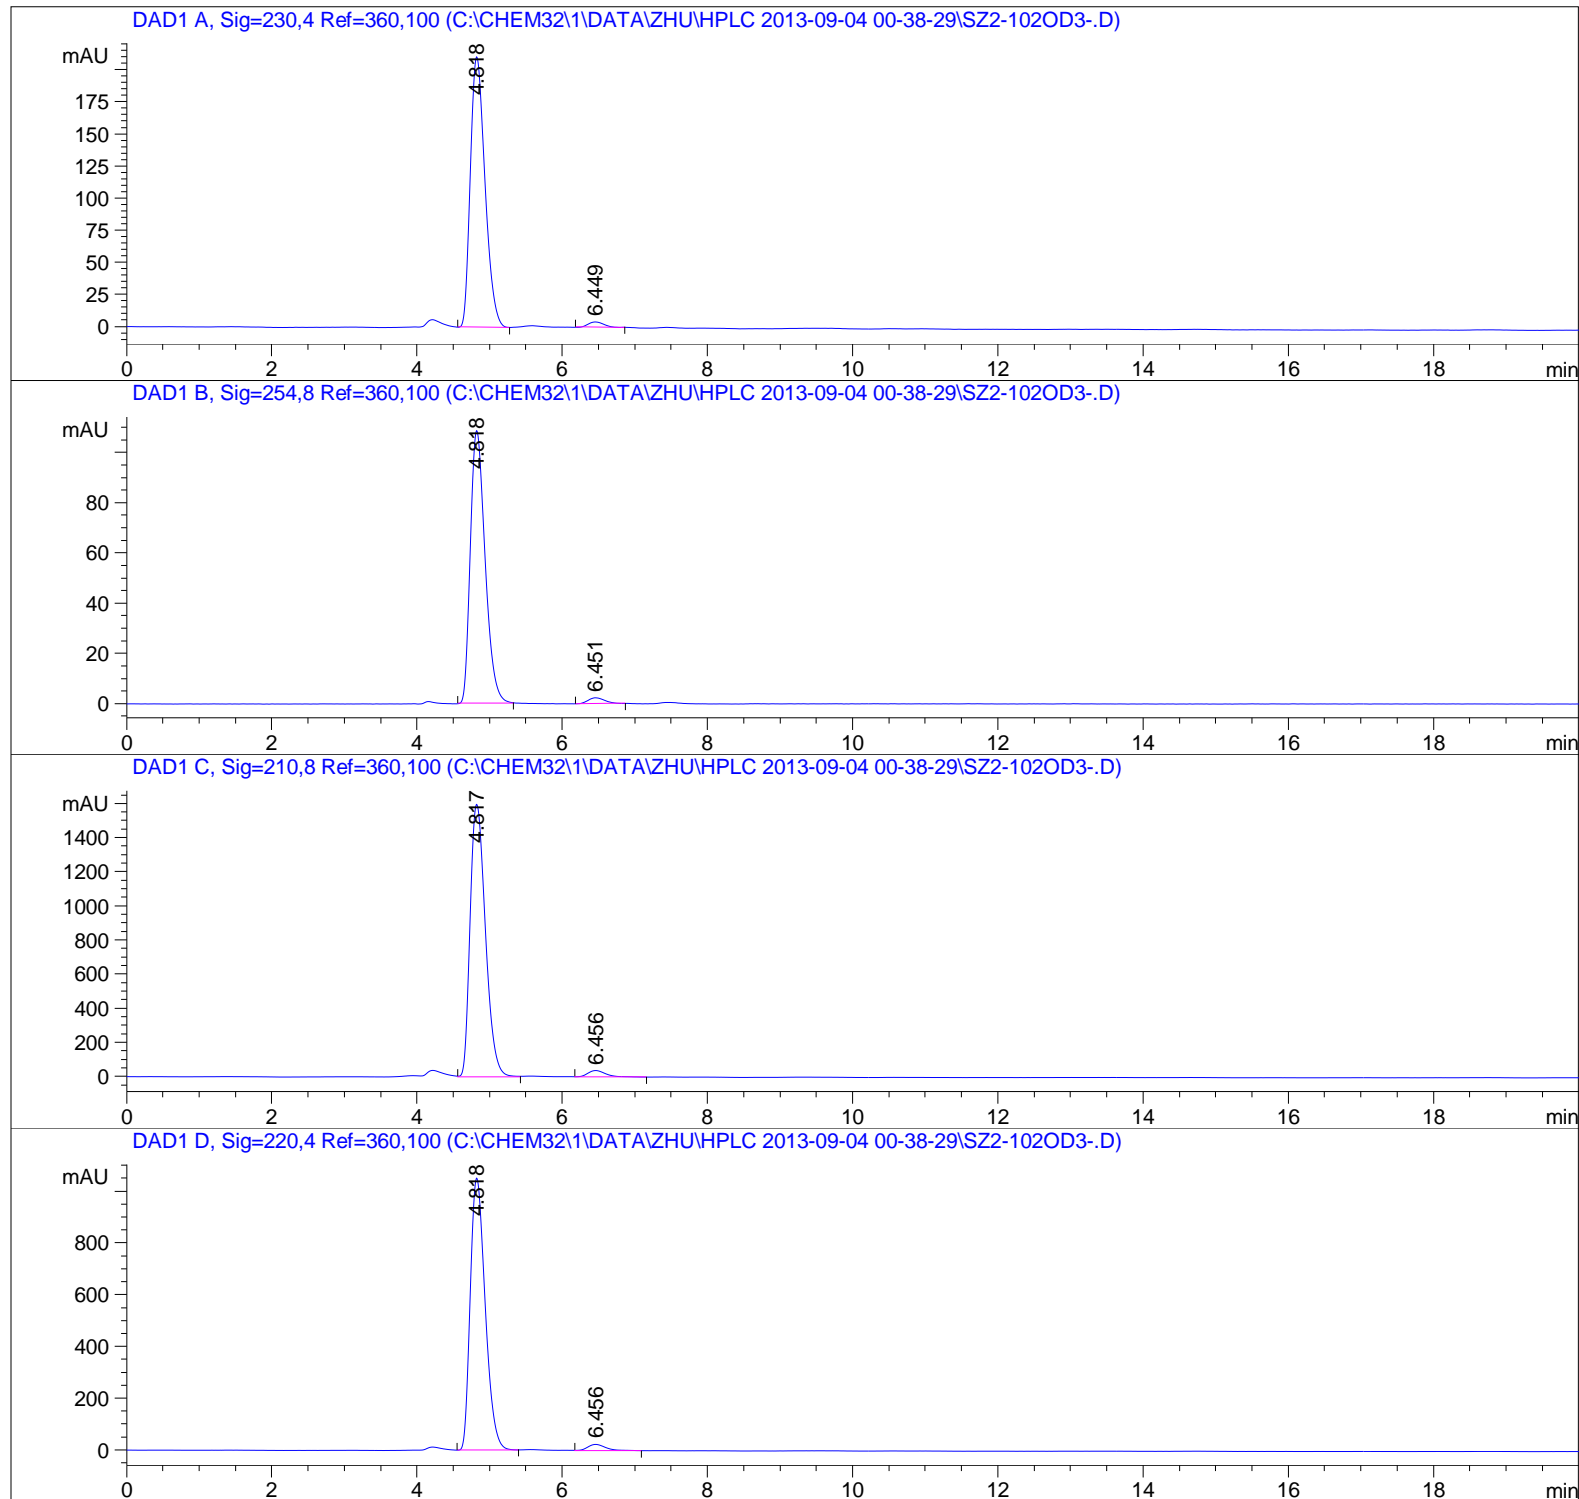



Sample Name: 2-102

## S17

=====  
Area Percent Report  
=====

Sorted By : Signal  
Multiplier: : 1.0000  
Dilution: : 1.0000  
Use Multiplier & Dilution Factor with ISTDs

Signal 1: DAD1 A, Sig=230,4 Ref=360,100

| Peak # | RetTime [min] | Type | Width [min] | Area [mAU*s] | Height [mAU] | Area %  |
|--------|---------------|------|-------------|--------------|--------------|---------|
| 1      | 4.818         | VB   | 0.2192      | 2946.55518   | 210.57788    | 97.8265 |
| 2      | 6.449         | BB   | 0.2369      | 65.46629     | 4.22284      | 2.1735  |

Totals : 3012.02147 214.80073

Signal 2: DAD1 B, Sig=254,8 Ref=360,100

| Peak # | RetTime [min] | Type | Width [min] | Area [mAU*s] | Height [mAU] | Area %  |
|--------|---------------|------|-------------|--------------|--------------|---------|
| 1      | 4.818         | BB   | 0.2209      | 1535.72363   | 108.66138    | 97.5437 |
| 2      | 6.451         | BB   | 0.2230      | 38.67113     | 2.36222      | 2.4563  |

Totals : 1574.39477 111.02360

Signal 3: DAD1 C, Sig=210,8 Ref=360,100

| Peak # | RetTime [min] | Type | Width [min] | Area [mAU*s] | Height [mAU] | Area %  |
|--------|---------------|------|-------------|--------------|--------------|---------|
| 1      | 4.817         | VB   | 0.2310      | 2.34122e4    | 1597.54065   | 97.1970 |
| 2      | 6.456         | VB   | 0.2744      | 675.17896    | 38.16037     | 2.8030  |

Totals : 2.40874e4 1635.70102

Signal 4: DAD1 D, Sig=220,4 Ref=360,100

| Peak # | RetTime [min] | Type | Width [min] | Area [mAU*s] | Height [mAU] | Area %  |
|--------|---------------|------|-------------|--------------|--------------|---------|
| 1      | 4.818         | VB   | 0.2251      | 1.50737e4    | 1052.55737   | 97.2667 |
| 2      | 6.456         | VB   | 0.2697      | 423.59091    | 24.03042     | 2.7333  |

Sample Name: 2-21

S18

```

=====
Acq. Operator   : RZ                               Seq. Line :    4
Acq. Instrument : Instrument 1                     Location  : Vial 63
Injection Date  : 8/25/2013 5:05:38 PM           Inj       :    1
                                                    Inj Volume: 5 µl
Different Inj Volume from Sequence !   Actual Inj Volume : 4 µl
Acq. Method     : C:\CHEM32\1\DATA\ZHU\HPLC 2013-08-25 15-29-30\AD-H03-30.M
Last changed    : 7/15/2013 8:52:24 PM by SHU
Analysis Method : C:\CHEM32\1\METHODS\AD-H20-60ETOH.M
Last changed    : 9/6/2013 1:11:38 PM by SZ
                (modified after loading)
  
```

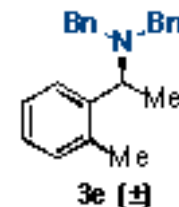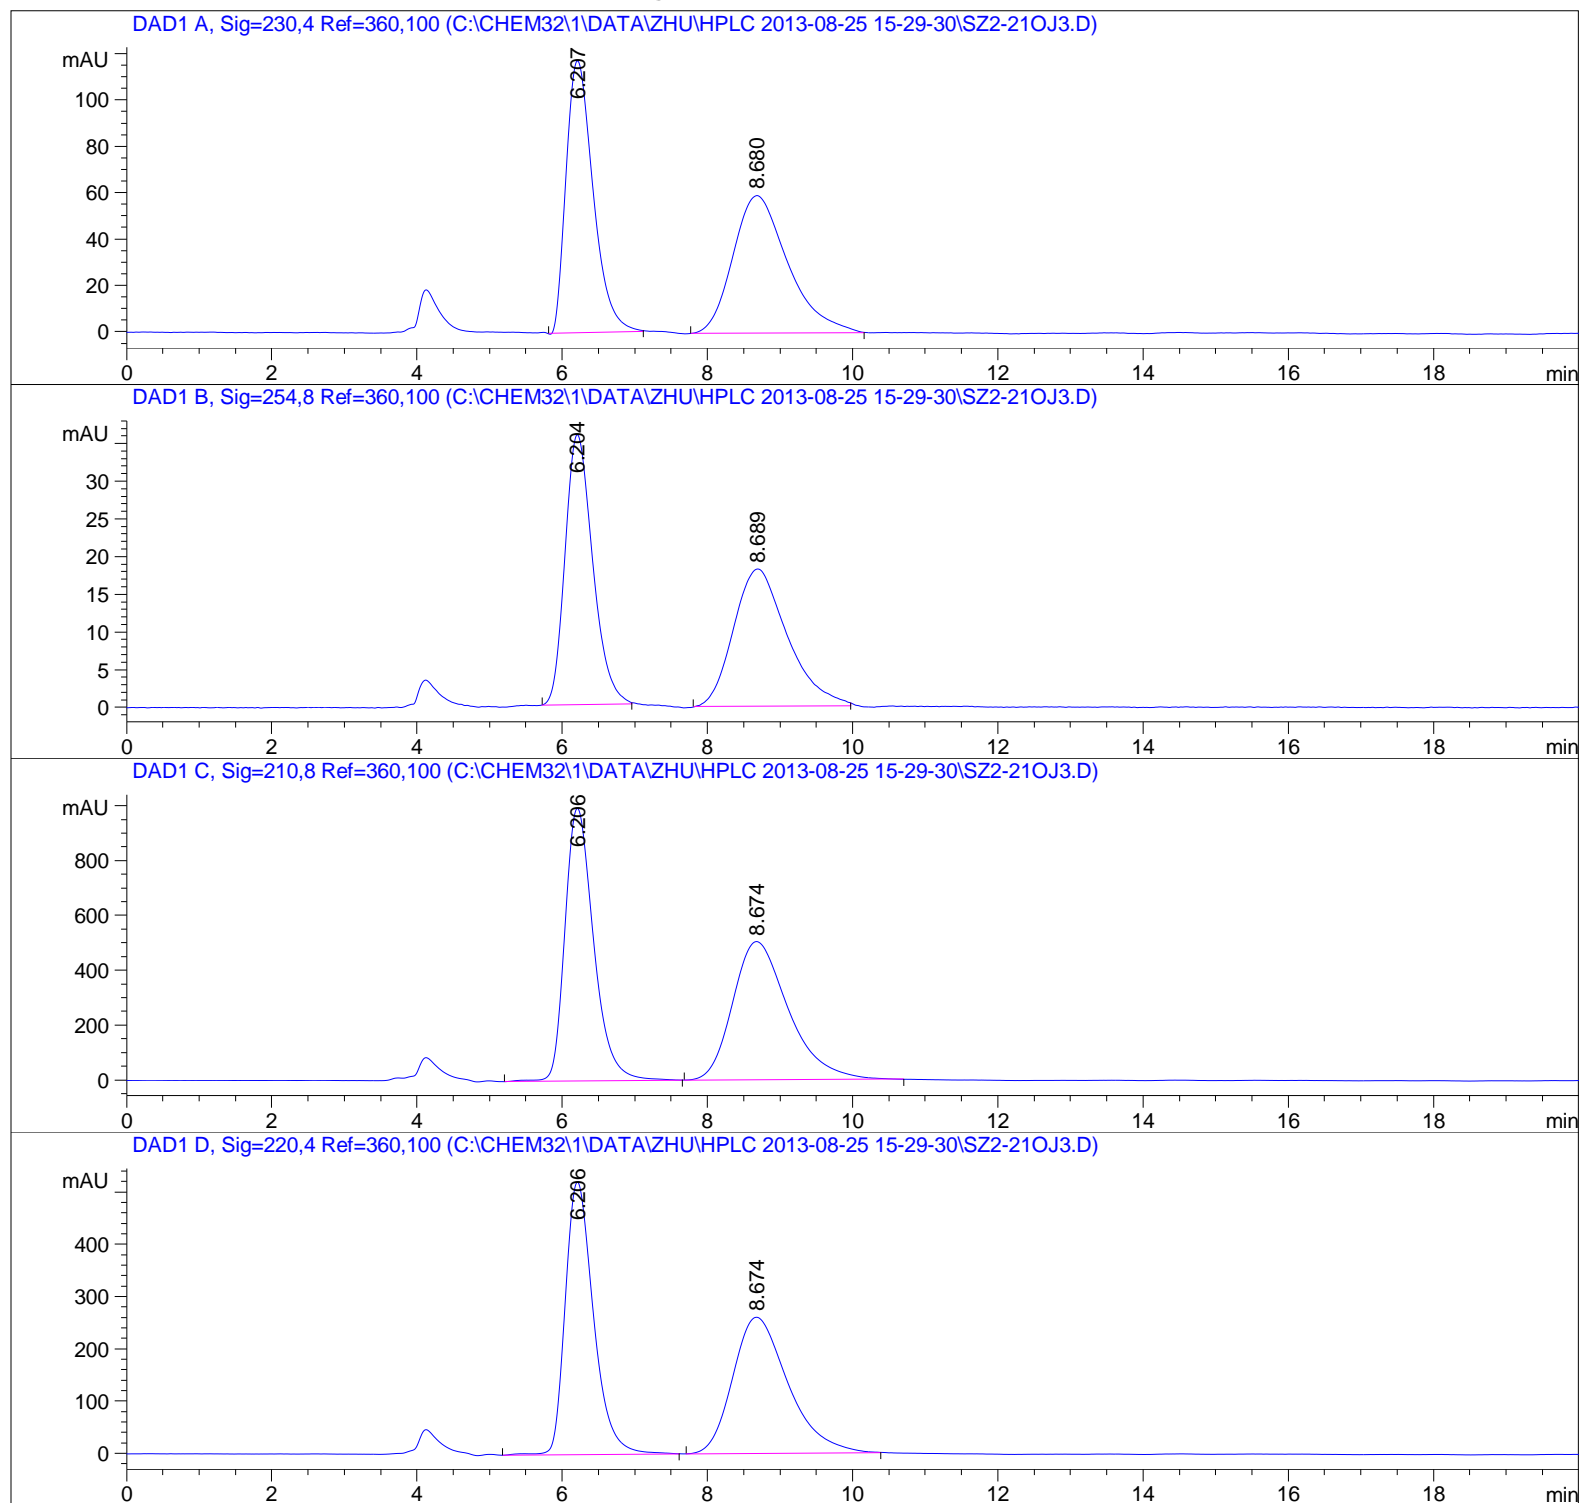

Sample Name: 2-21

## S19

=====  
Area Percent Report  
=====

Sorted By : Signal  
Multiplier: : 1.0000  
Dilution: : 1.0000  
Use Multiplier & Dilution Factor with ISTDs

Signal 1: DAD1 A, Sig=230,4 Ref=360,100

| Peak # | RetTime [min] | Type | Width [min] | Area [mAU*s] | Height [mAU] | Area %  |
|--------|---------------|------|-------------|--------------|--------------|---------|
| 1      | 6.207         | BB   | 0.4061      | 3042.53149   | 117.49760    | 49.3575 |
| 2      | 8.680         | BB   | 0.7512      | 3121.73755   | 59.39783     | 50.6425 |

Totals : 6164.26904 176.89543

Signal 2: DAD1 B, Sig=254,8 Ref=360,100

| Peak # | RetTime [min] | Type | Width [min] | Area [mAU*s] | Height [mAU] | Area %  |
|--------|---------------|------|-------------|--------------|--------------|---------|
| 1      | 6.204         | BB   | 0.4134      | 950.30396    | 35.83410     | 50.2459 |
| 2      | 8.689         | BB   | 0.6719      | 941.00232    | 18.23969     | 49.7541 |

Totals : 1891.30627 54.07379

Signal 3: DAD1 C, Sig=210,8 Ref=360,100

| Peak # | RetTime [min] | Type | Width [min] | Area [mAU*s] | Height [mAU] | Area %  |
|--------|---------------|------|-------------|--------------|--------------|---------|
| 1      | 6.206         | VB   | 0.4281      | 2.74816e4    | 995.40210    | 50.3354 |
| 2      | 8.674         | BB   | 0.7914      | 2.71154e4    | 505.81180    | 49.6646 |

Totals : 5.45970e4 1501.21390

Signal 4: DAD1 D, Sig=220,4 Ref=360,100

| Peak # | RetTime [min] | Type | Width [min] | Area [mAU*s] | Height [mAU] | Area %  |
|--------|---------------|------|-------------|--------------|--------------|---------|
| 1      | 6.206         | VB   | 0.4172      | 1.41870e4    | 521.72119    | 50.5891 |
| 2      | 8.674         | BB   | 0.7977      | 1.38566e4    | 260.87952    | 49.4109 |

Sample Name: 2-96

S20

```

=====
Acq. Operator   : RZ                               Seq. Line :    2
Acq. Instrument : Instrument 1                     Location  : Vial 62
Injection Date  : 8/25/2013 4:02:48 PM           Inj       :    1
                                                    Inj Volume: 5 µl
Different Inj Volume from Sequence !   Actual Inj Volume : 4 µl
Acq. Method    : C:\CHEM32\1\DATA\ZHU\HPLC 2013-08-25 15-29-30\AD-H03-30.M
Last changed   : 7/15/2013 8:52:24 PM by SHU
Analysis Method: C:\CHEM32\1\METHODS\AD-H20-60ETOH.M
Last changed   : 9/6/2013 1:11:38 PM by SZ
                (modified after loading)
=====

```

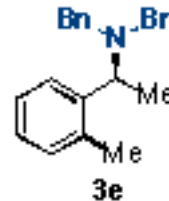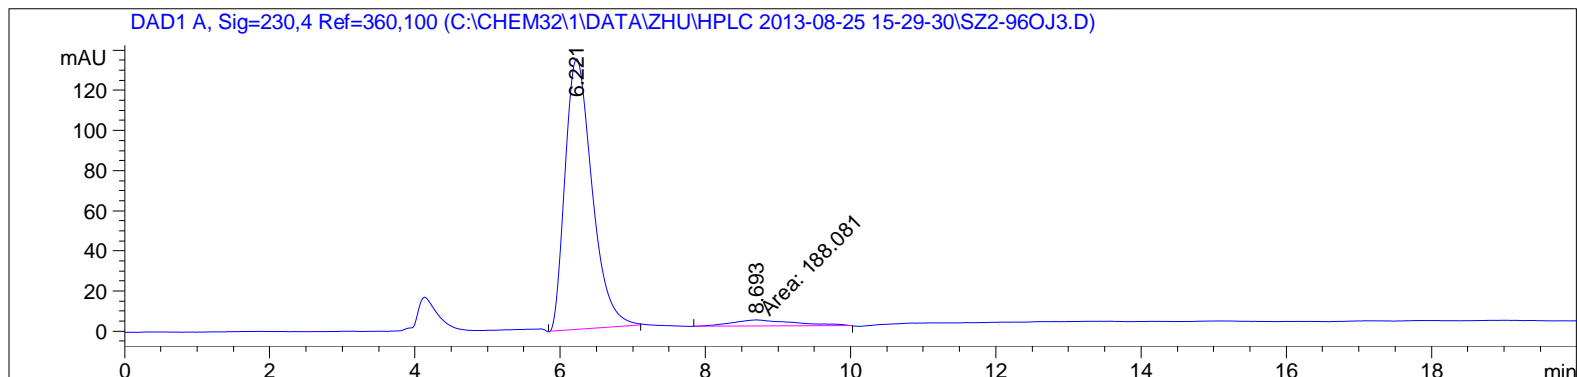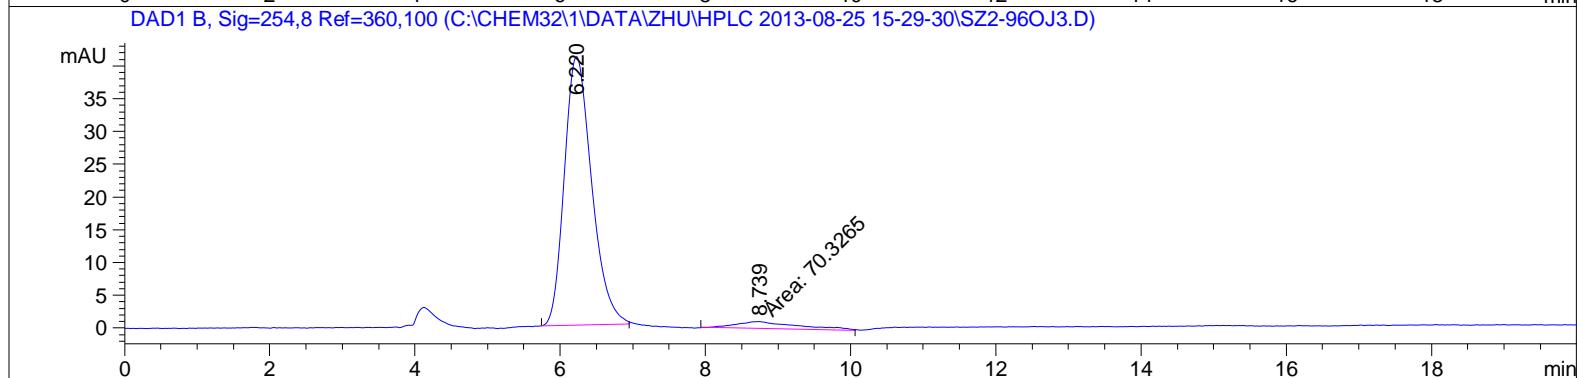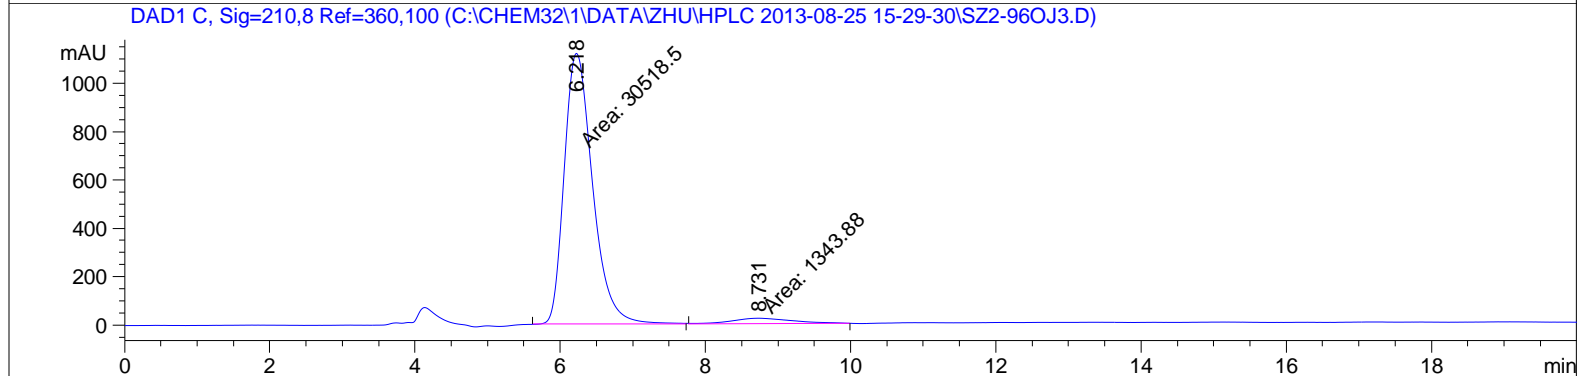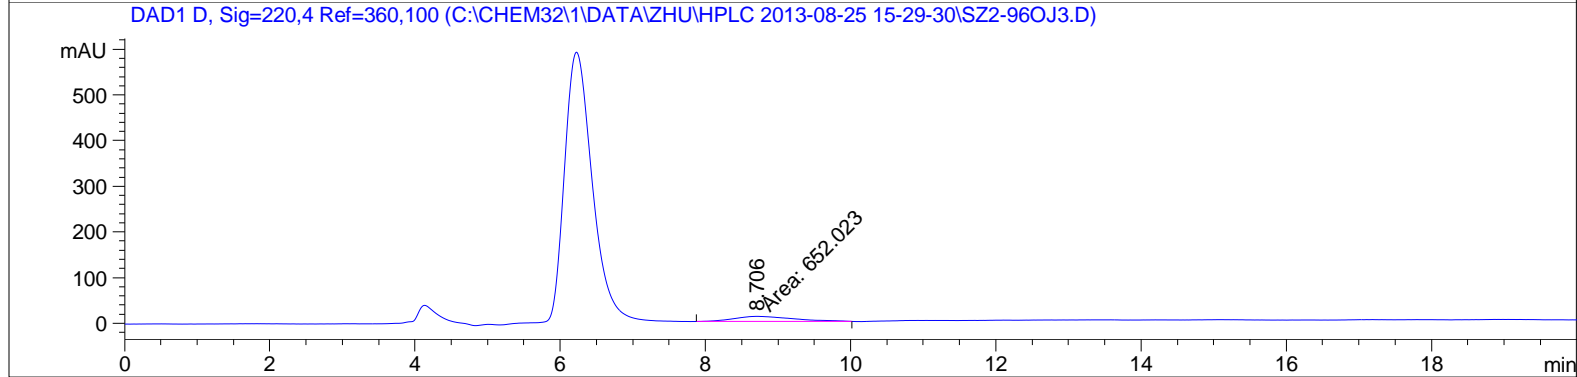

### S21

=====  
Area Percent Report  
=====

Sorted By : Signal  
Multiplier: : 1.0000  
Dilution: : 1.0000  
Use Multiplier & Dilution Factor with ISTDs

Signal 1: DAD1 A, Sig=230,4 Ref=360,100

| Peak # | RetTime [min] | Type | Width [min] | Area [mAU*s] | Height [mAU] | Area %  |
|--------|---------------|------|-------------|--------------|--------------|---------|
| 1      | 6.221         | BB   | 0.4004      | 3499.63818   | 135.00168    | 94.8998 |
| 2      | 8.693         | MM   | 1.0080      | 188.08095    | 3.10969      | 5.1002  |

Totals : 3687.71913 138.11137

Signal 2: DAD1 B, Sig=254,8 Ref=360,100

| Peak # | RetTime [min] | Type | Width [min] | Area [mAU*s] | Height [mAU] | Area %  |
|--------|---------------|------|-------------|--------------|--------------|---------|
| 1      | 6.220         | BB   | 0.4081      | 1076.14355   | 41.01268     | 93.8658 |
| 2      | 8.739         | MM   | 1.0644      | 70.32650     | 1.10121      | 6.1342  |

Totals : 1146.47005 42.11388

Signal 3: DAD1 C, Sig=210,8 Ref=360,100

| Peak # | RetTime [min] | Type | Width [min] | Area [mAU*s] | Height [mAU] | Area %  |
|--------|---------------|------|-------------|--------------|--------------|---------|
| 1      | 6.218         | MM   | 0.4541      | 3.05185e4    | 1120.11963   | 95.7000 |
| 2      | 8.731         | MM   | 0.9849      | 1343.88086   | 22.74046     | 4.2141  |
| 3      | 27.710        | BV   | 0.2885      | 27.38588     | 1.17256      | 0.0859  |

Totals : 3.18898e4 1144.03265

Signal 4: DAD1 D, Sig=220,4 Ref=360,100

Sample Name: 2-13rac

S22

```

=====
Acq. Operator   : SZ                               Seq. Line :    6
Acq. Instrument : Instrument 1                     Location  : Vial 63
Injection Date  : 8/19/2013 5:52:11 AM           Inj       :    1
                                                    Inj Volume: 5 µl
Different Inj Volume from Sequence !      Actual Inj Volume : 4 µl
Acq. Method    : C:\CHEM32\1\DATA\ZHU\HPLC 2013-08-19 02-30-08\AD-H10-60.M
Last changed   : 7/31/2013 4:50:30 PM by RZ
Analysis Method: C:\CHEM32\1\METHODS\AD-H20-60ETOH.M
Last changed   : 9/6/2013 1:08:35 PM by SZ
                (modified after loading)
  
```

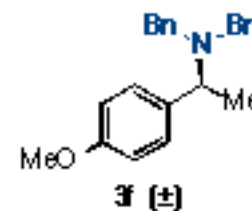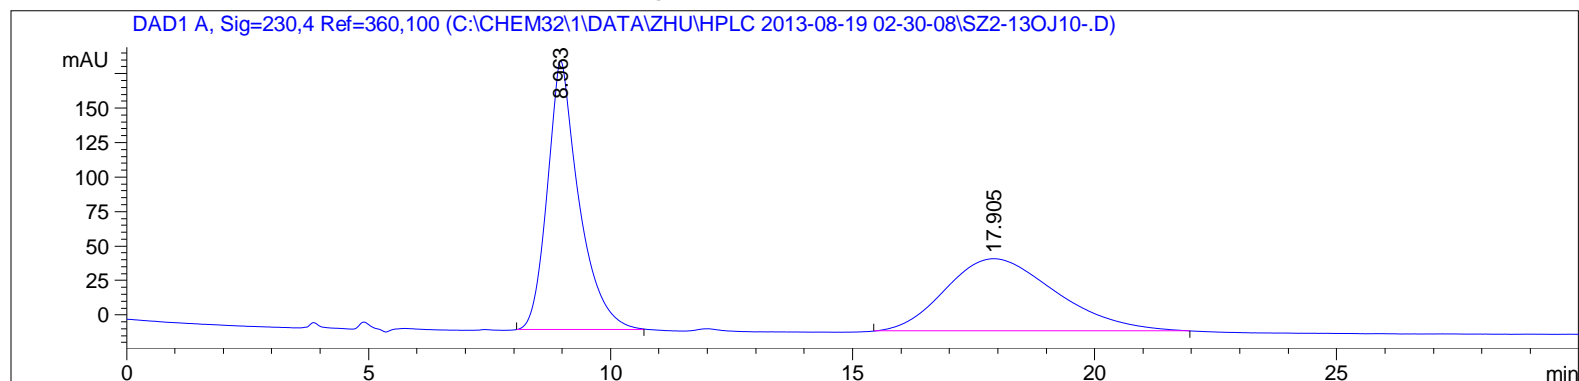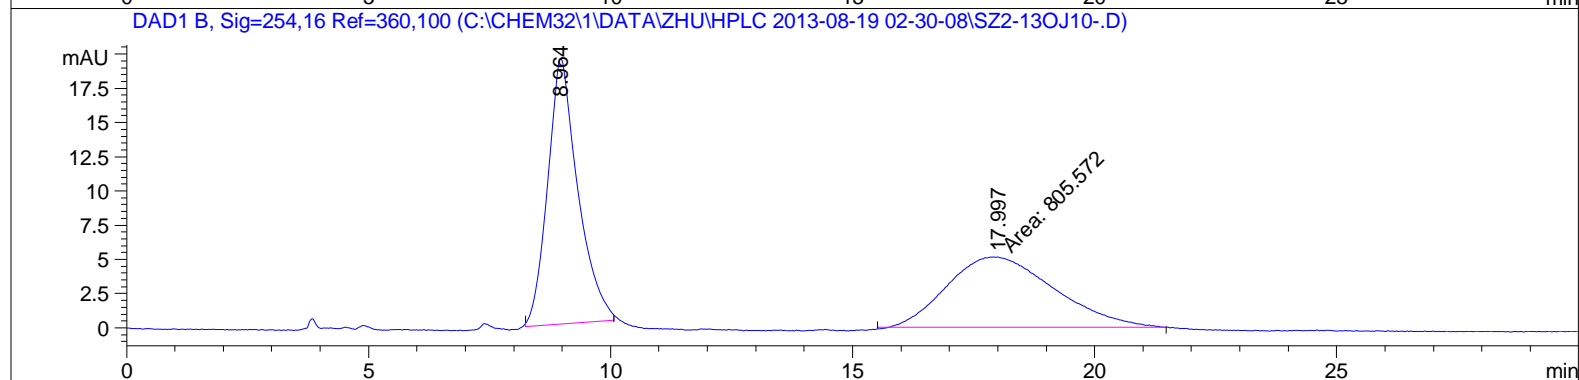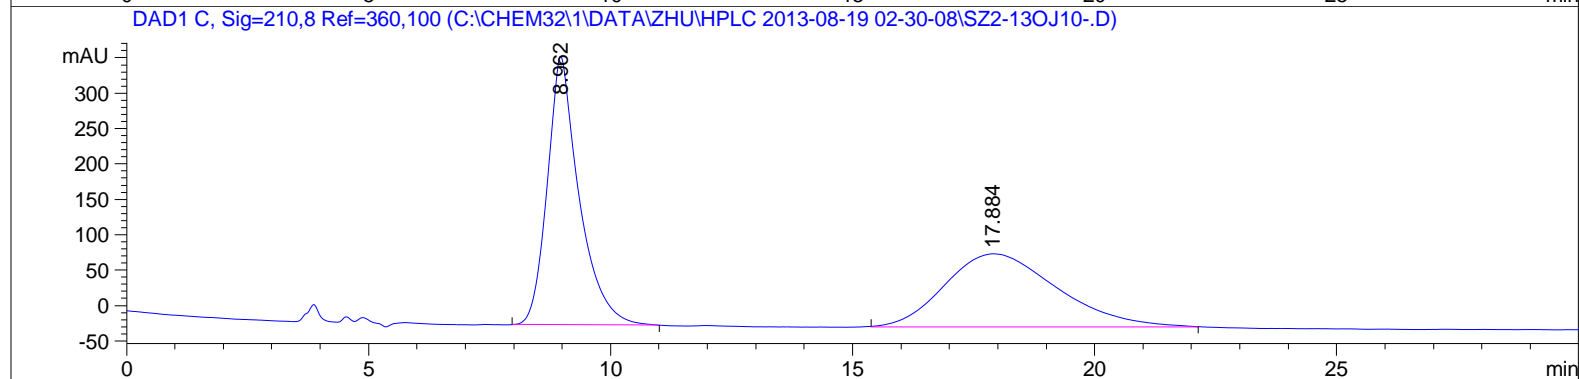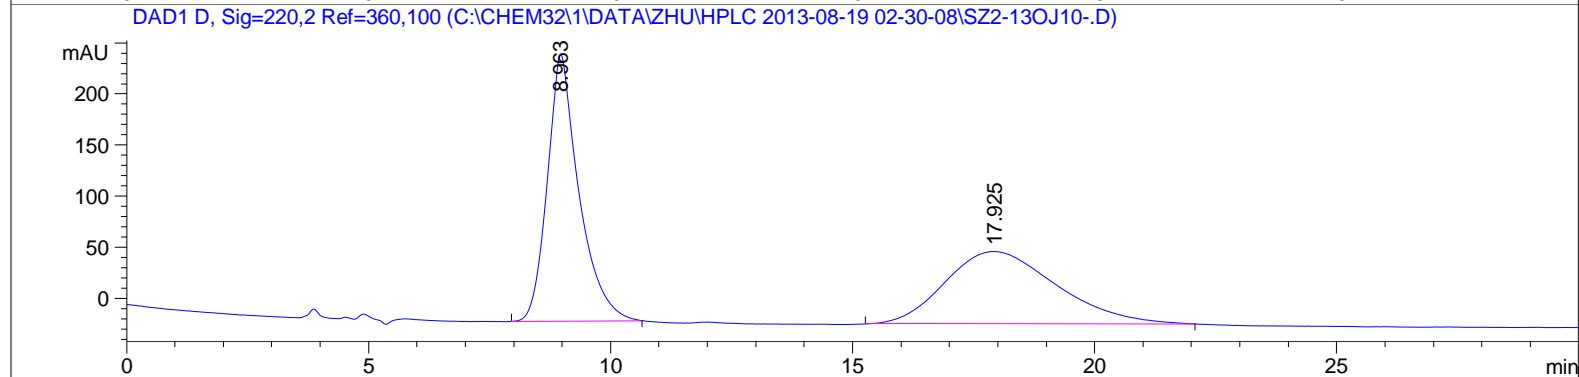

Sample Name: 2-13rac

## S23

=====  
Area Percent Report  
=====

Sorted By : Signal  
Multiplier: : 1.0000  
Dilution: : 1.0000  
Use Multiplier & Dilution Factor with ISTDs

Signal 1: DAD1 A, Sig=230,4 Ref=360,100

| Peak # | RetTime [min] | Type | Width [min] | Area [mAU*s] | Height [mAU] | Area %  |
|--------|---------------|------|-------------|--------------|--------------|---------|
| 1      | 8.963         | BB   | 0.6455      | 8854.01953   | 195.07523    | 51.3217 |
| 2      | 17.905        | BB   | 1.8692      | 8397.97656   | 52.52849     | 48.6783 |

Totals : 1.72520e4 247.60371

Signal 2: DAD1 B, Sig=254,16 Ref=360,100

| Peak # | RetTime [min] | Type | Width [min] | Area [mAU*s] | Height [mAU] | Area %  |
|--------|---------------|------|-------------|--------------|--------------|---------|
| 1      | 8.964         | BB   | 0.5883      | 842.97681    | 19.42290     | 51.1345 |
| 2      | 17.997        | MM   | 2.5943      | 805.57172    | 5.17532      | 48.8655 |

Totals : 1648.54852 24.59821

Signal 3: DAD1 C, Sig=210,8 Ref=360,100

| Peak # | RetTime [min] | Type | Width [min] | Area [mAU*s] | Height [mAU] | Area %  |
|--------|---------------|------|-------------|--------------|--------------|---------|
| 1      | 8.962         | BB   | 0.6401      | 1.73746e4    | 379.51340    | 50.9894 |
| 2      | 17.884        | BB   | 1.8947      | 1.67003e4    | 103.48570    | 49.0106 |

Totals : 3.40749e4 482.99910

Signal 4: DAD1 D, Sig=220,2 Ref=360,100

| Peak # | RetTime [min] | Type | Width [min] | Area [mAU*s] | Height [mAU] | Area %  |
|--------|---------------|------|-------------|--------------|--------------|---------|
| 1      | 8.963         | BB   | 0.6282      | 1.18930e4    | 261.69489    | 50.9841 |
| 2      | 17.925        | BB   | 1.8897      | 1.14339e4    | 71.04230     | 49.0159 |

Sample Name: 2-85

### S24

=====

|                                      |                                                             |                   |           |
|--------------------------------------|-------------------------------------------------------------|-------------------|-----------|
| Acq. Operator                        | : SZ                                                        | Seq. Line         | : 4       |
| Acq. Instrument                      | : Instrument 1                                              | Location          | : Vial 62 |
| Injection Date                       | : 8/19/2013 4:39:19 AM                                      | Inj               | : 1       |
|                                      |                                                             | Inj Volume        | : 5 µl    |
| Different Inj Volume from Sequence ! |                                                             | Actual Inj Volume | : 4 µl    |
| Acq. Method                          | : C:\CHEM32\1\DATA\ZHU\HPLC 2013-08-19 02-30-08\AD-H10-60.M |                   |           |
| Last changed                         | : 7/31/2013 4:50:30 PM by RZ                                |                   |           |
| Analysis Method                      | : C:\CHEM32\1\METHODS\AD-H20-60ETOH.M                       |                   |           |
| Last changed                         | : 9/6/2013 1:08:35 PM by SZ                                 |                   |           |
|                                      | (modified after loading)                                    |                   |           |

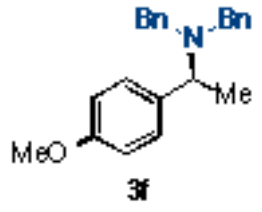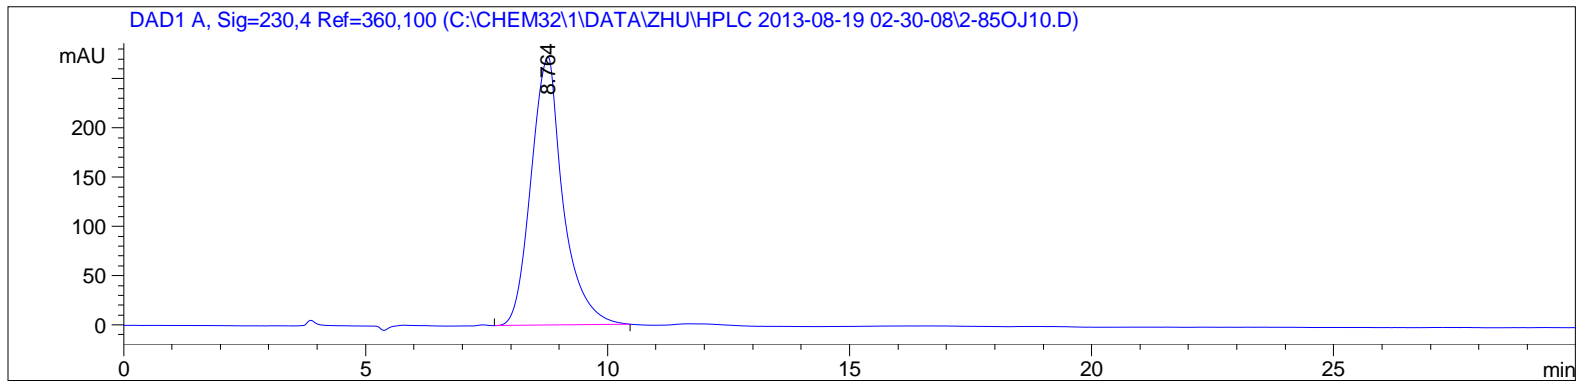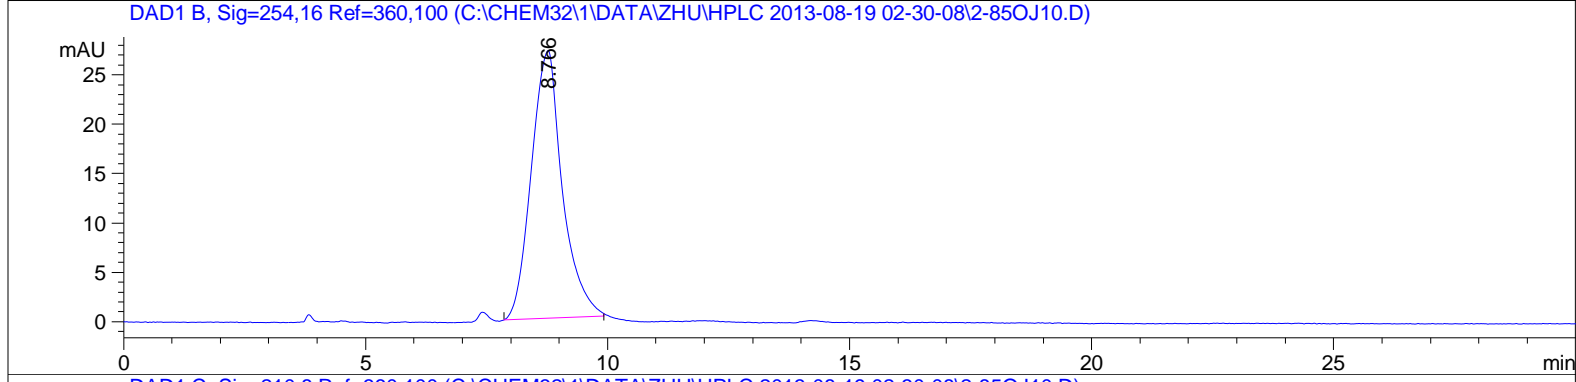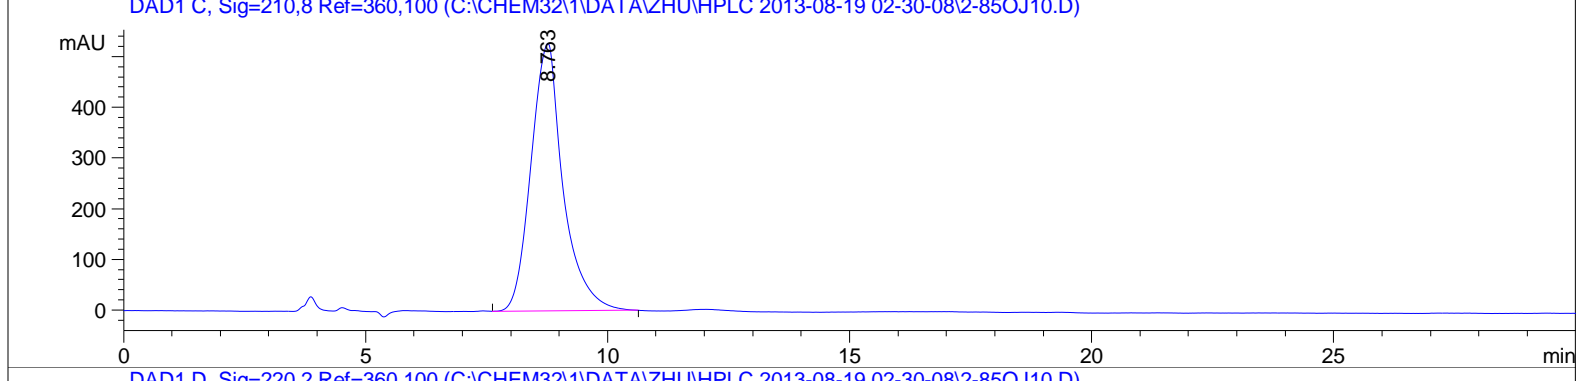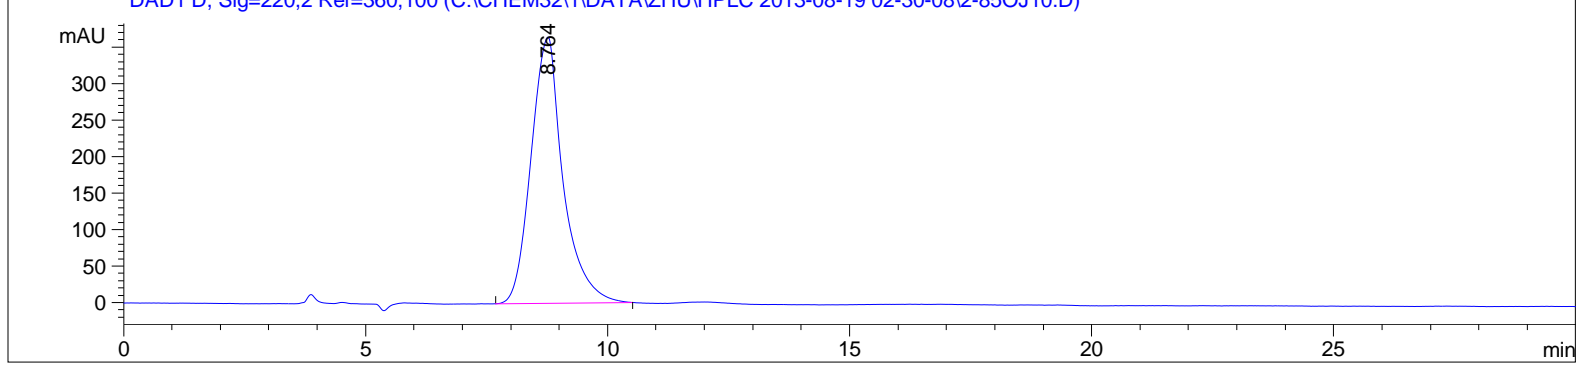



Sample Name: 2-85

## S25

=====  
Area Percent Report  
=====

Sorted By : Signal  
Multiplier: : 1.0000  
Dilution: : 1.0000  
Use Multiplier & Dilution Factor with ISTDs

Signal 1: DAD1 A, Sig=230,4 Ref=360,100

| Peak # | RetTime [min] | Type | Width [min] | Area [mAU*s] | Height [mAU] | Area %   |
|--------|---------------|------|-------------|--------------|--------------|----------|
| 1      | 8.764         | VB   | 0.6829      | 1.24944e4    | 272.52264    | 100.0000 |

Totals : 1.24944e4 272.52264

Signal 2: DAD1 B, Sig=254,16 Ref=360,100

| Peak # | RetTime [min] | Type | Width [min] | Area [mAU*s] | Height [mAU] | Area %   |
|--------|---------------|------|-------------|--------------|--------------|----------|
| 1      | 8.766         | BB   | 0.6629      | 1210.84778   | 27.11912     | 100.0000 |

Totals : 1210.84778 27.11912

Signal 3: DAD1 C, Sig=210,8 Ref=360,100

| Peak # | RetTime [min] | Type | Width [min] | Area [mAU*s] | Height [mAU] | Area %   |
|--------|---------------|------|-------------|--------------|--------------|----------|
| 1      | 8.763         | VB   | 0.6819      | 2.43357e4    | 527.84674    | 100.0000 |

Totals : 2.43357e4 527.84674

Signal 4: DAD1 D, Sig=220,2 Ref=360,100

| Peak # | RetTime [min] | Type | Width [min] | Area [mAU*s] | Height [mAU] | Area %   |
|--------|---------------|------|-------------|--------------|--------------|----------|
| 1      | 8.764         | BB   | 0.6906      | 1.67810e4    | 364.87149    | 100.0000 |

Totals : 1.67810e4 364.87149

Sample Name: 2-5

S26

```

=====
Acq. Operator   :                               Seq. Line :    6
Acq. Instrument : Instrument 1                  Location  : Vial 61
Injection Date  : 7/24/2013 1:44:46 AM        Inj       :    1
                                                Inj Volume: 5 µl
Different Inj Volume from Sequence !      Actual Inj Volume : 4 µl
Acq. Method    : C:\CHEM32\1\DATA\ZHU\HPLC 2013-07-23 22-44-43\AD-H10-60.M
Last changed   : 7/24/2013 12:33:28 AM by SHU
Analysis Method: C:\CHEM32\1\METHODS\AD-H20-60ETOH.M
Last changed   : 9/6/2013 1:41:14 PM by SZ
                (modified after loading)
  
```

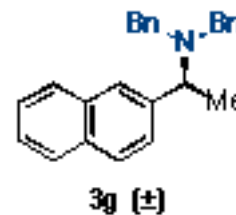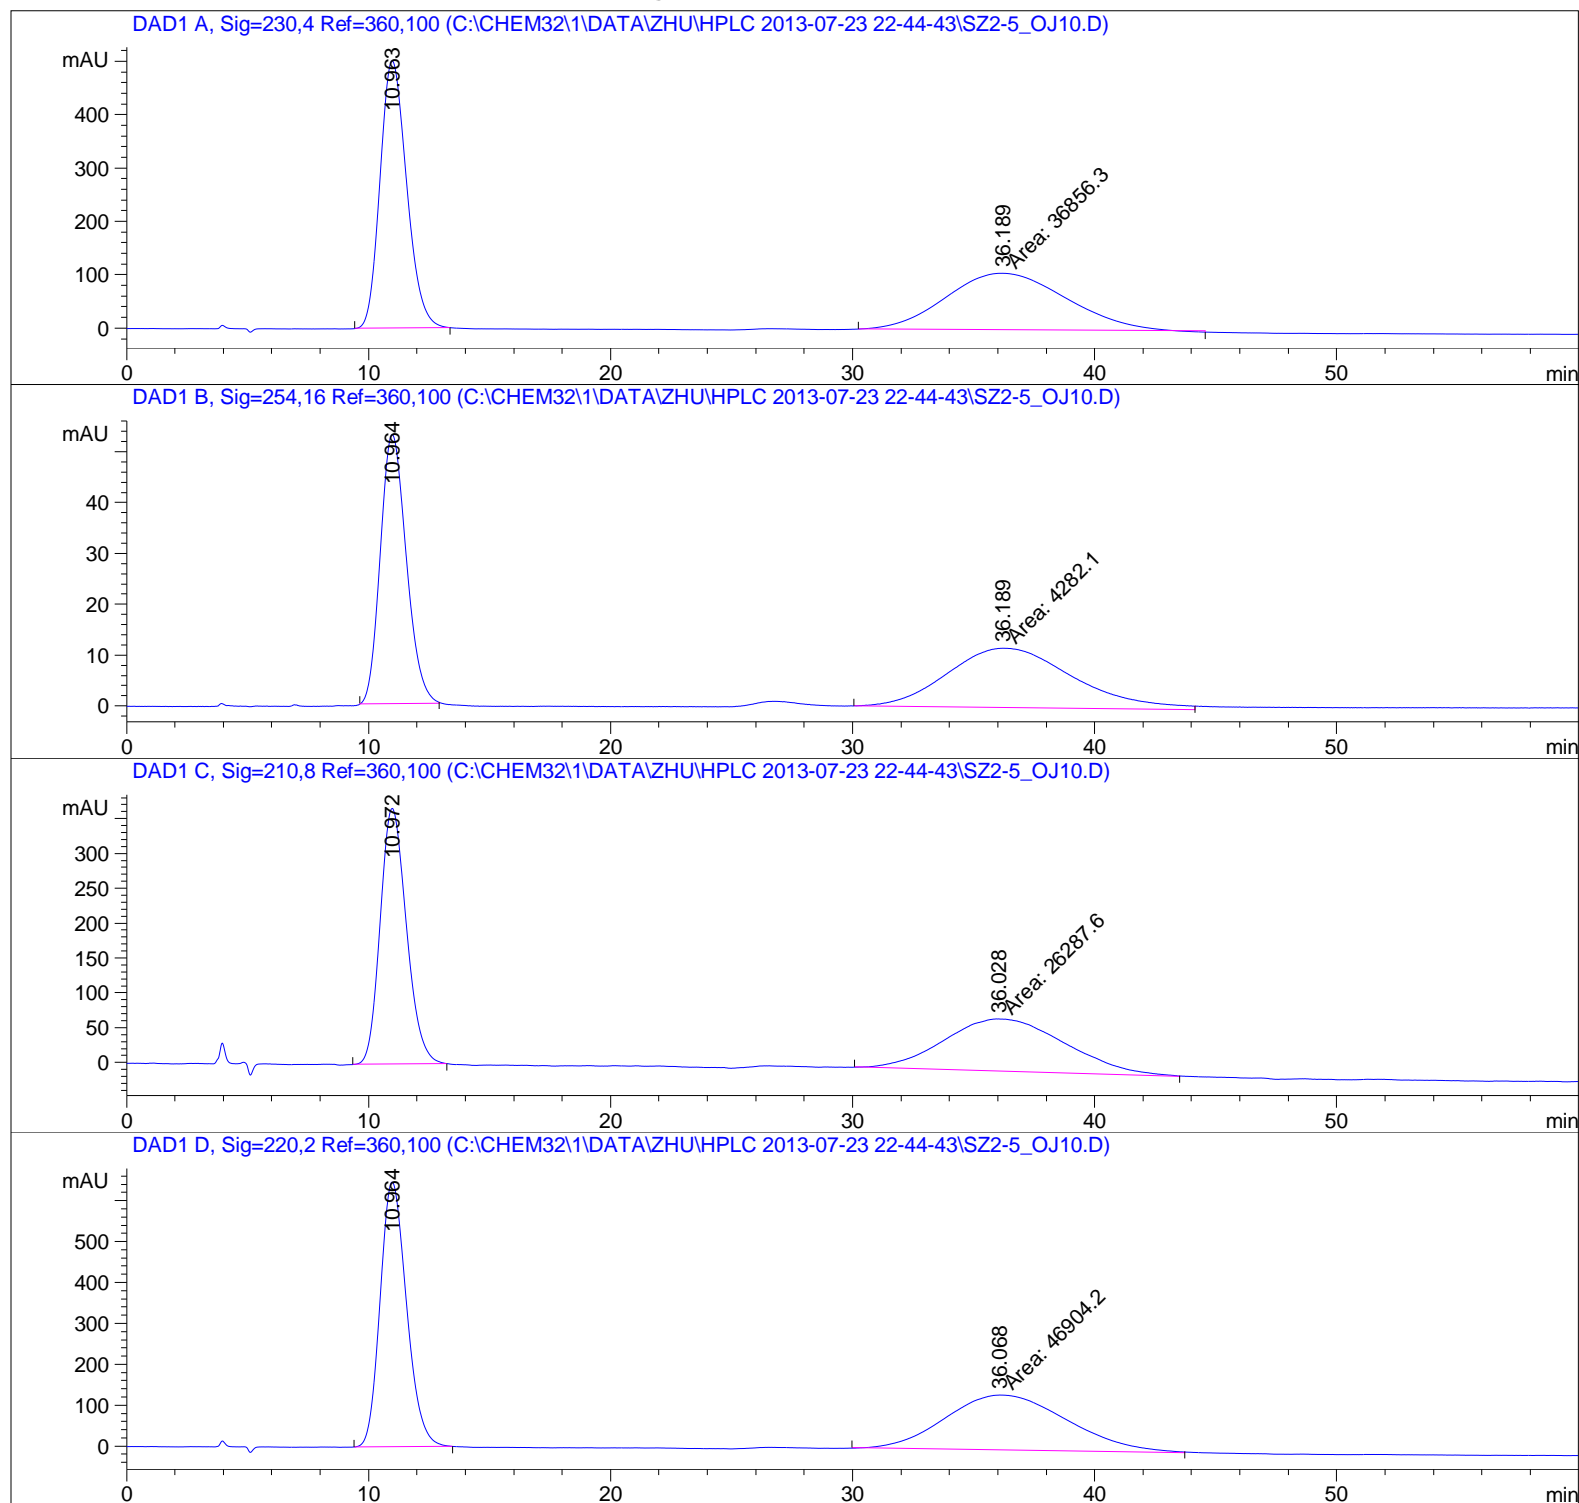

Sample Name: 2-5

## S27

=====  
Area Percent Report  
=====

Sorted By : Signal  
Multiplier: : 1.0000  
Dilution: : 1.0000  
Use Multiplier & Dilution Factor with ISTDs

Signal 1: DAD1 A, Sig=230,4 Ref=360,100

| Peak # | RetTime [min] | Type | Width [min] | Area [mAU*s] | Height [mAU] | Area %  |
|--------|---------------|------|-------------|--------------|--------------|---------|
| 1      | 10.963        | BB   | 1.1386      | 3.83449e4    | 501.21277    | 50.9897 |
| 2      | 36.189        | MM   | 5.7725      | 3.68563e4    | 106.41365    | 49.0103 |

Totals : 7.52013e4 607.62642

Signal 2: DAD1 B, Sig=254,16 Ref=360,100

| Peak # | RetTime [min] | Type | Width [min] | Area [mAU*s] | Height [mAU] | Area %  |
|--------|---------------|------|-------------|--------------|--------------|---------|
| 1      | 10.964        | BB   | 1.0572      | 3954.85327   | 52.95868     | 48.0136 |
| 2      | 36.189        | MM   | 6.0757      | 4282.09668   | 11.74654     | 51.9864 |

Totals : 8236.94995 64.70522

Signal 3: DAD1 C, Sig=210,8 Ref=360,100

| Peak # | RetTime [min] | Type | Width [min] | Area [mAU*s] | Height [mAU] | Area %  |
|--------|---------------|------|-------------|--------------|--------------|---------|
| 1      | 10.972        | BB   | 1.0920      | 2.77021e4    | 367.25171    | 51.3100 |
| 2      | 36.028        | MM   | 5.8151      | 2.62876e4    | 75.34319     | 48.6900 |

Totals : 5.39897e4 442.59490

Signal 4: DAD1 D, Sig=220,2 Ref=360,100

| Peak # | RetTime [min] | Type | Width [min] | Area [mAU*s] | Height [mAU] | Area %  |
|--------|---------------|------|-------------|--------------|--------------|---------|
| 1      | 10.964        | BB   | 1.0654      | 4.91355e4    | 647.43884    | 51.1617 |
| 2      | 36.068        | MM   | 5.8184      | 4.69042e4    | 134.35622    | 48.8383 |

Sample Name: 2-14

S28

```
=====
Acq. Operator   : RZ                               Seq. Line :    4
Acq. Instrument : Instrument 1                     Location  : Vial 62
Injection Date  : 7/31/2013 12:42:25 PM           Inj       :    1
                                                    Inj Volume: 5 µl
Acq. Method     : C:\CHEM32\1\DATA\ZHU\HPLC 2013-07-31 10-54-04\AD-H10-60.M
Last changed    : 7/24/2013 12:33:28 AM by SHU
Analysis Method : C:\CHEM32\1\METHODS\AD-H20-60ETOH.M
Last changed    : 9/6/2013 1:41:14 PM by SZ
                (modified after loading)
=====
```

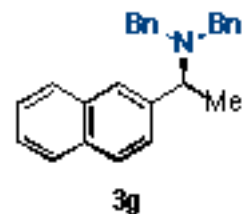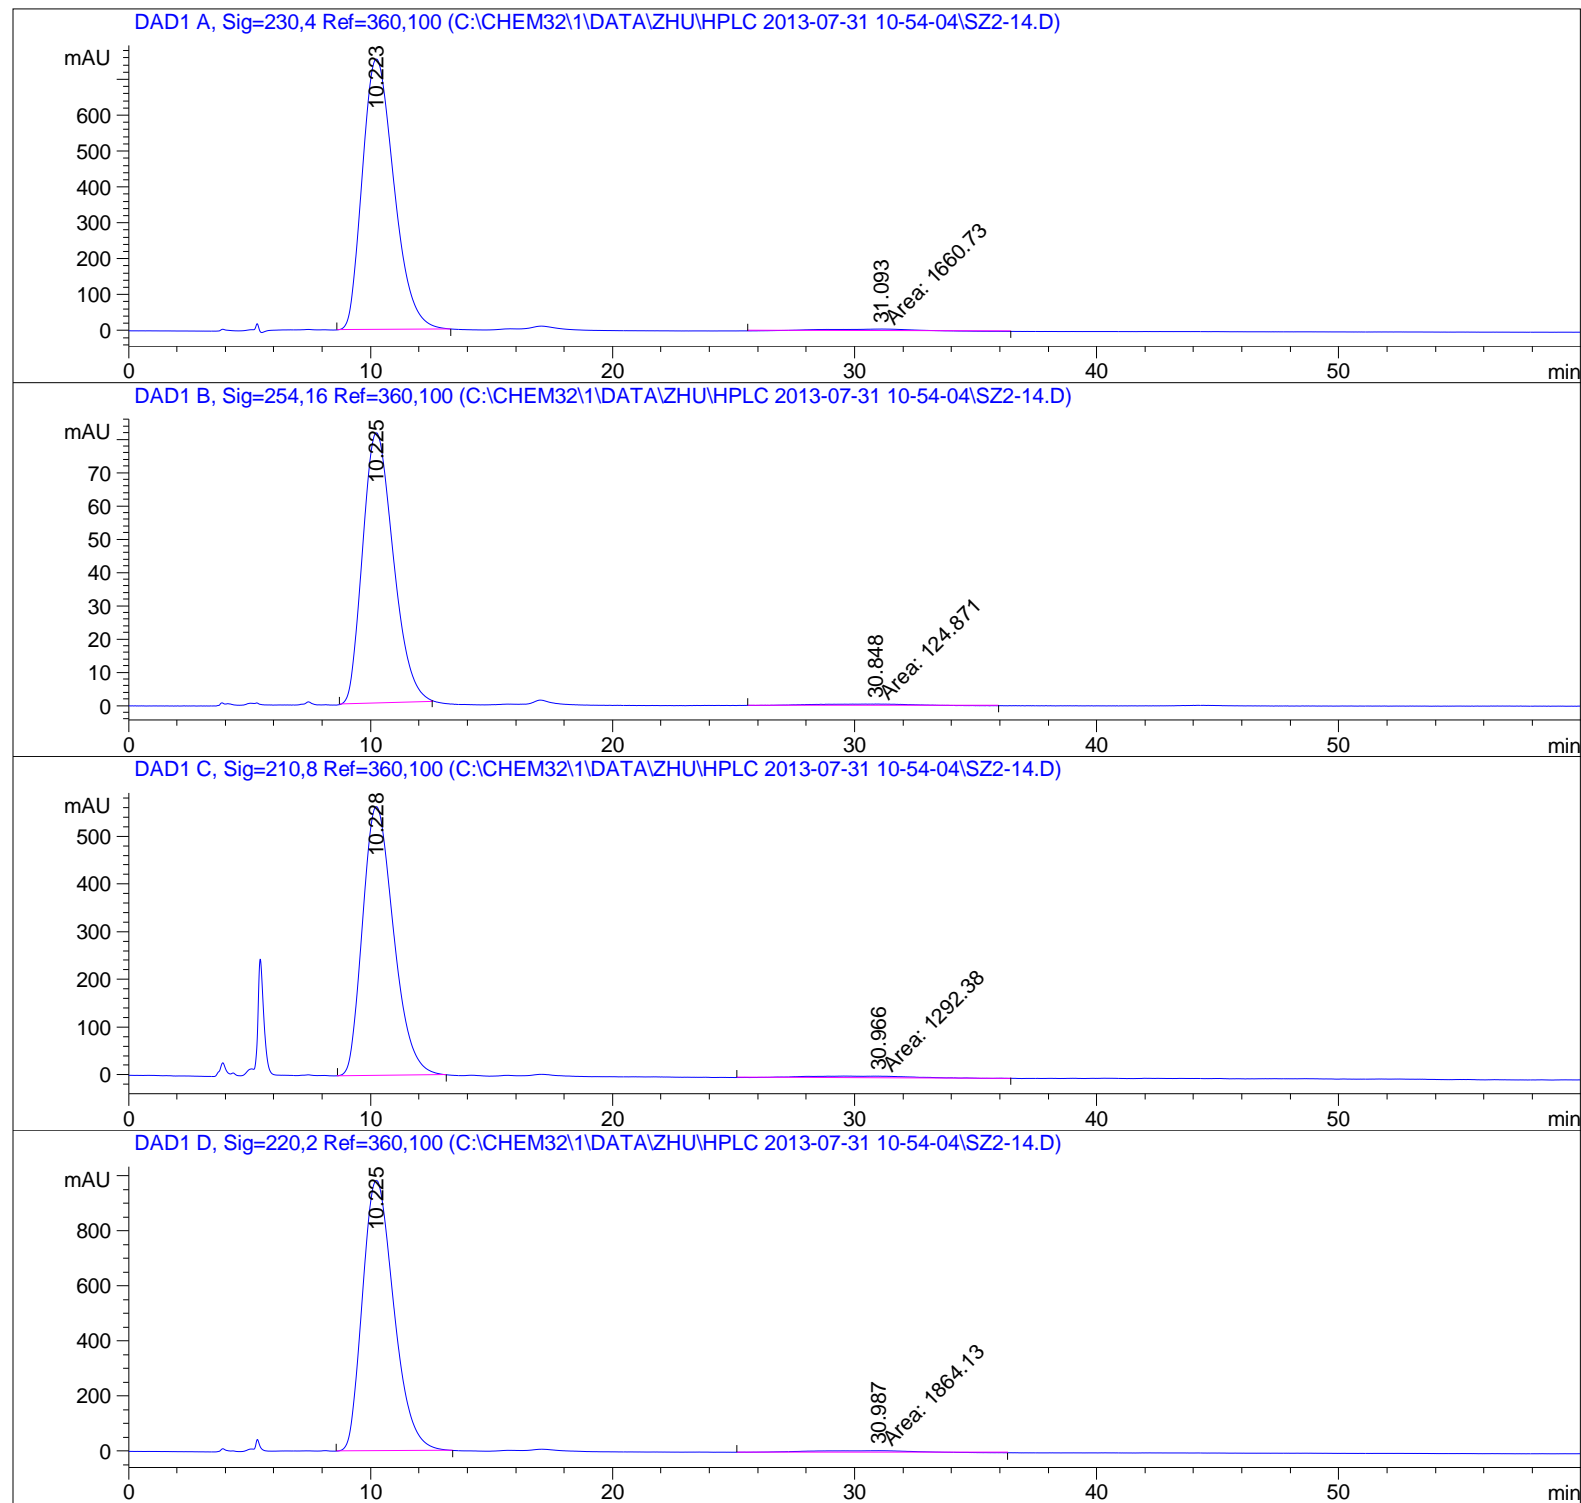

Sample Name: 2-14

## S29

=====  
Area Percent Report  
=====

Sorted By : Signal  
Multiplier: : 1.0000  
Dilution: : 1.0000  
Use Multiplier & Dilution Factor with ISTDs

Signal 1: DAD1 A, Sig=230,4 Ref=360,100

| Peak # | RetTime [min] | Type | Width [min] | Area [mAU*s] | Height [mAU] | Area %  |
|--------|---------------|------|-------------|--------------|--------------|---------|
| 1      | 10.223        | BB   | 1.3532      | 6.86279e4    | 754.51062    | 97.6373 |
| 2      | 31.093        | MM   | 4.7568      | 1660.73291   | 5.81875      | 2.3627  |

Totals : 7.02886e4 760.32937

Signal 2: DAD1 B, Sig=254,16 Ref=360,100

| Peak # | RetTime [min] | Type | Width [min] | Area [mAU*s] | Height [mAU] | Area %  |
|--------|---------------|------|-------------|--------------|--------------|---------|
| 1      | 10.225        | BB   | 1.2615      | 7162.53955   | 81.32999     | 98.2865 |
| 2      | 30.848        | MM   | 4.5739      | 124.87120    | 4.55015e-1   | 1.7135  |

Totals : 7287.41075 81.78500

Signal 3: DAD1 C, Sig=210,8 Ref=360,100

| Peak # | RetTime [min] | Type | Width [min] | Area [mAU*s] | Height [mAU] | Area %  |
|--------|---------------|------|-------------|--------------|--------------|---------|
| 1      | 10.228        | BB   | 1.2076      | 5.01543e4    | 563.94965    | 97.4879 |
| 2      | 30.966        | MM   | 5.4338      | 1292.38049   | 3.96403      | 2.5121  |

Totals : 5.14467e4 567.91368

Signal 4: DAD1 D, Sig=220,2 Ref=360,100

| Peak # | RetTime [min] | Type | Width [min] | Area [mAU*s] | Height [mAU] | Area %  |
|--------|---------------|------|-------------|--------------|--------------|---------|
| 1      | 10.225        | BB   | 1.0843      | 8.83111e4    | 982.84705    | 97.9328 |
| 2      | 30.987        | MM   | 4.9753      | 1864.12561   | 6.24464      | 2.0672  |

Sample Name: 1-290-0RAC

S30

=====

|                                      |                                                             |                   |             |
|--------------------------------------|-------------------------------------------------------------|-------------------|-------------|
| Acq. Operator                        | : SZ                                                        | Seq. Line         | : 8         |
| Acq. Instrument                      | : Instrument 1                                              | Location          | : Vial 62   |
| Injection Date                       | : 9/4/2013 4:19:49 AM                                       | Inj               | : 1         |
|                                      |                                                             | Inj Volume        | : 5 $\mu$ l |
| Different Inj Volume from Sequence ! |                                                             | Actual Inj Volume | : 3 $\mu$ l |
| Acq. Method                          | : C:\CHEM32\1\DATA\ZHU\HPLC 2013-09-04 00-38-29\AD-H05-30.M |                   |             |
| Last changed                         | : 8/7/2013 11:47:17 AM by RZ                                |                   |             |
| Analysis Method                      | : C:\CHEM32\1\METHODS\AD-H20-60ETOH.M                       |                   |             |
| Last changed                         | : 9/6/2013 12:38:52 PM by SZ                                |                   |             |

(modified after loading)

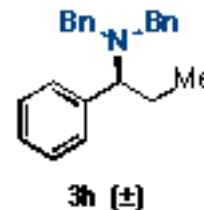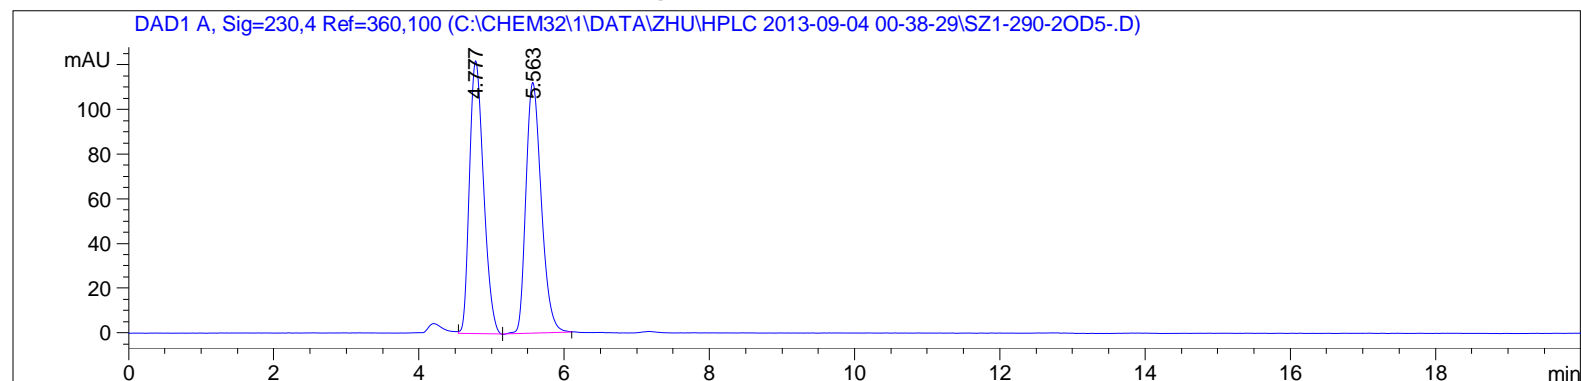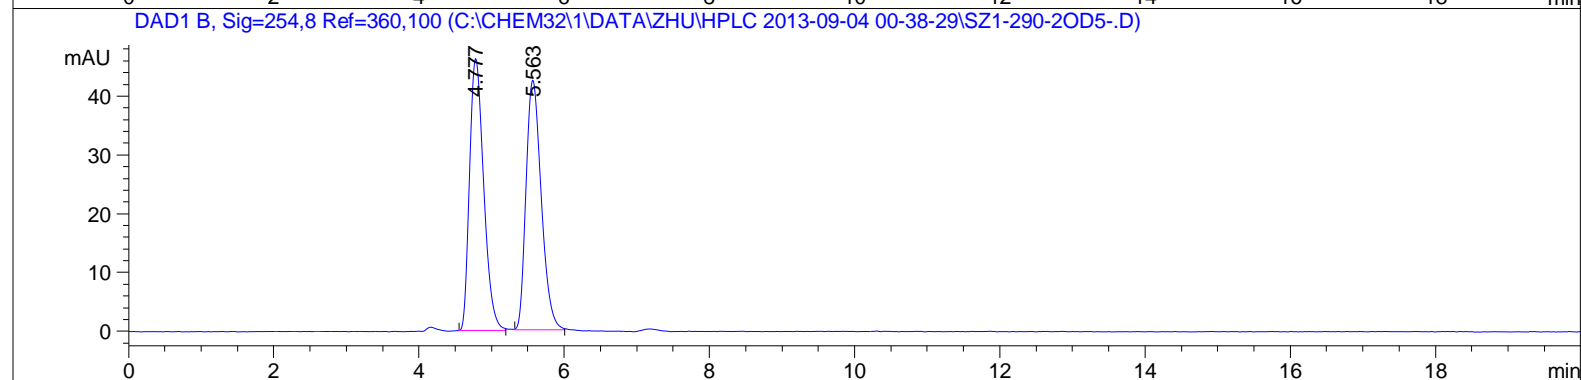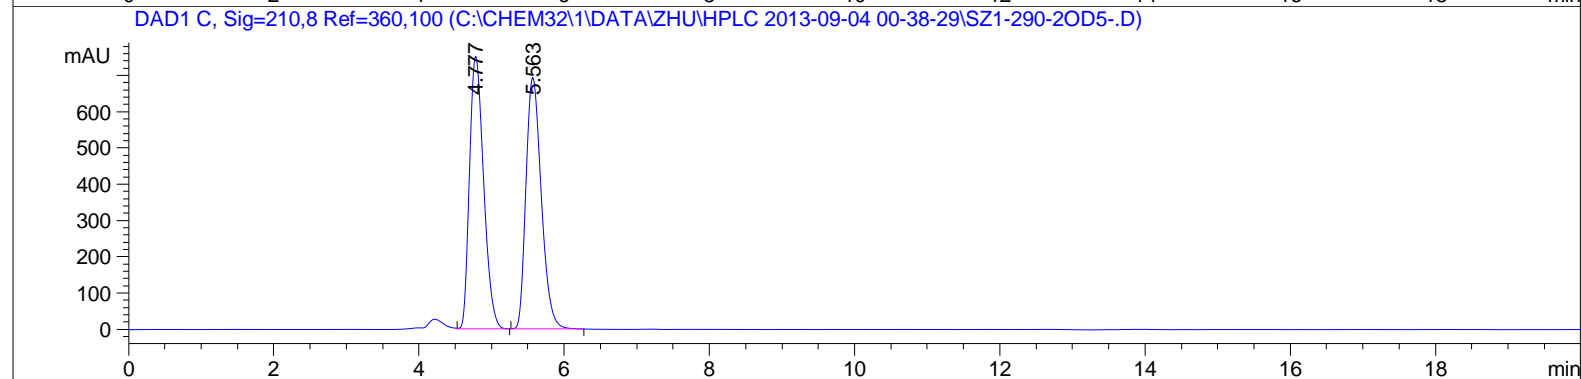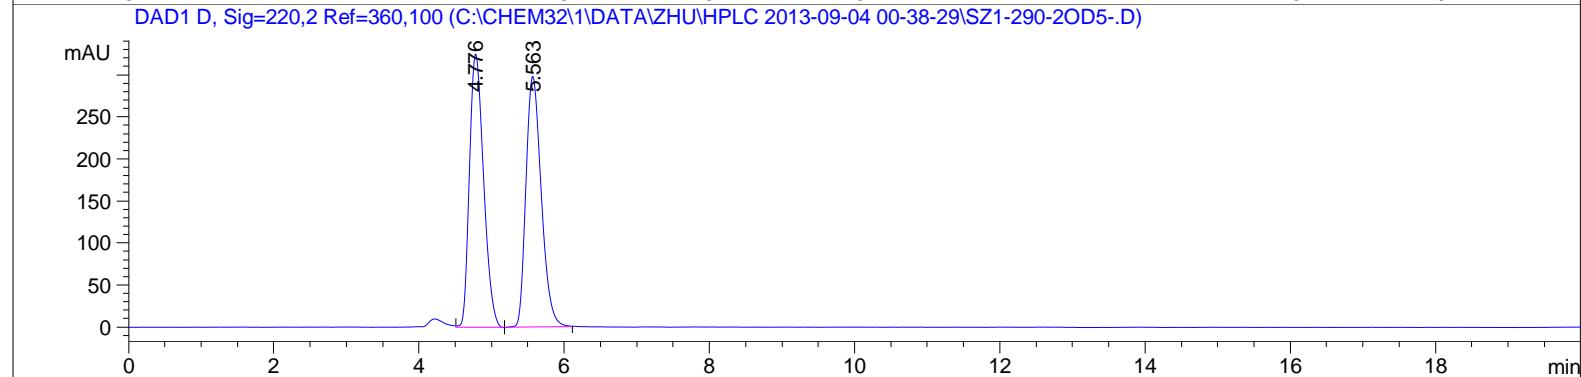

### S31

=====  
Area Percent Report  
=====

Sorted By : Signal  
Multiplier: : 1.0000  
Dilution: : 1.0000  
Use Multiplier & Dilution Factor with ISTDs

Signal 1: DAD1 A, Sig=230,4 Ref=360,100

| Peak # | RetTime [min] | Type | Width [min] | Area [mAU*s] | Height [mAU] | Area %  |
|--------|---------------|------|-------------|--------------|--------------|---------|
| 1      | 4.777         | BV   | 0.2114      | 1649.06104   | 122.22649    | 49.8602 |
| 2      | 5.563         | VB   | 0.2281      | 1658.30701   | 112.40995    | 50.1398 |

Totals : 3307.36804 234.63644

Signal 2: DAD1 B, Sig=254,8 Ref=360,100

| Peak # | RetTime [min] | Type | Width [min] | Area [mAU*s] | Height [mAU] | Area %  |
|--------|---------------|------|-------------|--------------|--------------|---------|
| 1      | 4.777         | BB   | 0.2119      | 626.58698    | 46.29708     | 50.2289 |
| 2      | 5.563         | BB   | 0.2283      | 620.87592    | 42.52330     | 49.7711 |

Totals : 1247.46289 88.82038

Signal 3: DAD1 C, Sig=210,8 Ref=360,100

| Peak # | RetTime [min] | Type | Width [min] | Area [mAU*s] | Height [mAU] | Area %  |
|--------|---------------|------|-------------|--------------|--------------|---------|
| 1      | 4.777         | VB   | 0.2122      | 1.02040e4    | 752.67163    | 50.0058 |
| 2      | 5.563         | BB   | 0.2295      | 1.02017e4    | 693.98999    | 49.9942 |

Totals : 2.04057e4 1446.66162

Signal 4: DAD1 D, Sig=220,2 Ref=360,100

| Peak # | RetTime [min] | Type | Width [min] | Area [mAU*s] | Height [mAU] | Area %  |
|--------|---------------|------|-------------|--------------|--------------|---------|
| 1      | 4.776         | VV   | 0.2119      | 4402.42139   | 325.18460    | 50.0944 |
| 2      | 5.563         | VB   | 0.2295      | 4385.82861   | 298.38989    | 49.9056 |

Sample Name: 2-141

S32

=====

|                                                                         |                          |
|-------------------------------------------------------------------------|--------------------------|
| Acq. Operator : SZ                                                      | Seq. Line : 6            |
| Acq. Instrument : Instrument 1                                          | Location : Vial 61       |
| Injection Date : 9/4/2013 3:17:05 AM                                    | Inj : 1                  |
|                                                                         | Inj Volume : 5 µl        |
| Different Inj Volume from Sequence !                                    | Actual Inj Volume : 3 µl |
| Acq. Method : C:\CHEM32\1\DATA\ZHU\HPLC 2013-09-04 00-38-29\AD-H05-30.M |                          |
| Last changed : 8/7/2013 11:47:17 AM by RZ                               |                          |
| Analysis Method : C:\CHEM32\1\METHODS\AD-H20-60ETOH.M                   |                          |
| Last changed : 9/6/2013 12:38:52 PM by SZ                               |                          |

(modified after loading)

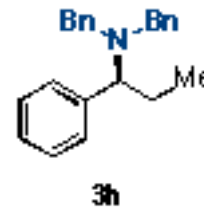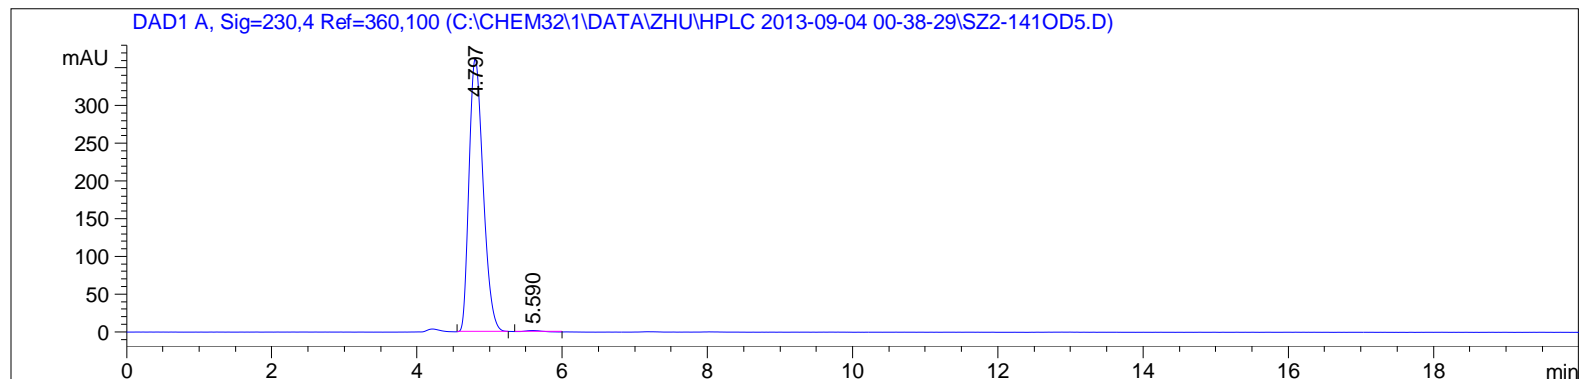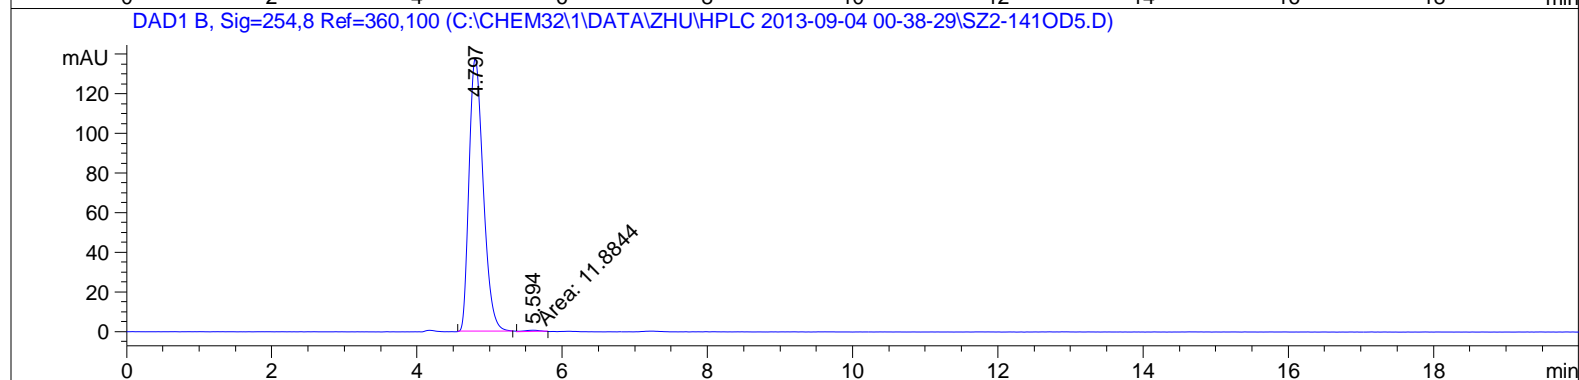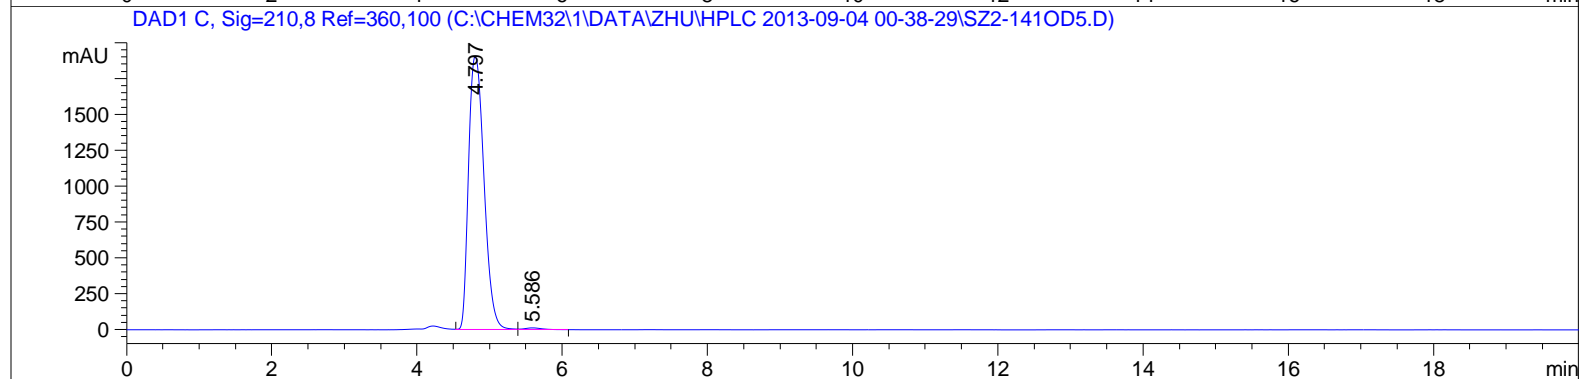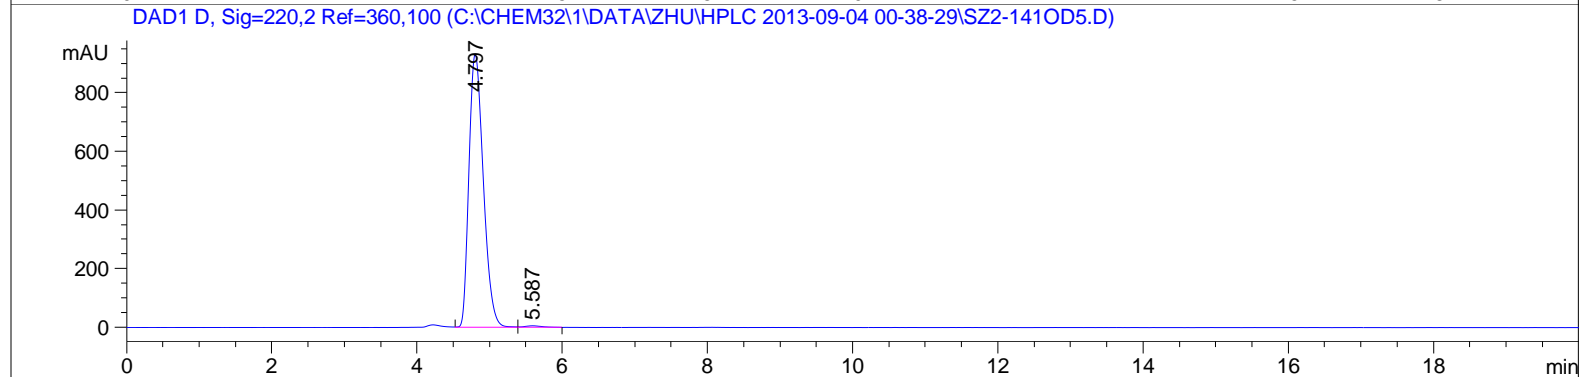



Sample Name: 2-141

## S33

=====  
Area Percent Report  
=====

Sorted By : Signal  
Multiplier: : 1.0000  
Dilution: : 1.0000  
Use Multiplier & Dilution Factor with ISTDs

Signal 1: DAD1 A, Sig=230,4 Ref=360,100

| Peak # | RetTime [min] | Type | Width [min] | Area [mAU*s] | Height [mAU] | Area %  |
|--------|---------------|------|-------------|--------------|--------------|---------|
| 1      | 4.797         | BB   | 0.2115      | 4882.22217   | 361.74579    | 99.5765 |
| 2      | 5.590         | BB   | 0.1914      | 20.76602     | 1.53891      | 0.4235  |

Totals : 4902.98819 363.28470

Signal 2: DAD1 B, Sig=254,8 Ref=360,100

| Peak # | RetTime [min] | Type | Width [min] | Area [mAU*s] | Height [mAU] | Area %  |
|--------|---------------|------|-------------|--------------|--------------|---------|
| 1      | 4.797         | BB   | 0.2125      | 1871.61267   | 137.74536    | 99.3690 |
| 2      | 5.594         | MM   | 0.2667      | 11.88439     | 7.42730e-1   | 0.6310  |

Totals : 1883.49707 138.48809

Signal 3: DAD1 C, Sig=210,8 Ref=360,100

| Peak # | RetTime [min] | Type | Width [min] | Area [mAU*s] | Height [mAU] | Area %  |
|--------|---------------|------|-------------|--------------|--------------|---------|
| 1      | 4.797         | VV   | 0.2364      | 2.81531e4    | 1905.07153   | 99.2208 |
| 2      | 5.586         | VB   | 0.2519      | 221.10376    | 12.77430     | 0.7792  |

Totals : 2.83742e4 1917.84583

Signal 4: DAD1 D, Sig=220,2 Ref=360,100

| Peak # | RetTime [min] | Type | Width [min] | Area [mAU*s] | Height [mAU] | Area %  |
|--------|---------------|------|-------------|--------------|--------------|---------|
| 1      | 4.797         | VV   | 0.2145      | 1.28200e4    | 932.09900    | 99.3016 |
| 2      | 5.587         | VB   | 0.2254      | 90.17070     | 5.38478      | 0.6984  |



S35

=====  
Area Percent Report  
=====

Sorted By : Signal  
Multiplier: : 1.0000  
Dilution: : 1.0000  
Use Multiplier & Dilution Factor with ISTDs

Signal 1: DAD1 A, Sig=230,4 Ref=360,100

| Peak # | RetTime [min] | Type | Width [min] | Area [mAU*s] | Height [mAU] | Area %  |
|--------|---------------|------|-------------|--------------|--------------|---------|
| 1      | 4.664         | VV   | 0.2706      | 2103.30542   | 127.41042    | 49.4491 |
| 2      | 5.371         | VB   | 0.2983      | 2150.16772   | 115.95297    | 50.5509 |

Totals : 4253.47314 243.36340

Signal 2: DAD1 B, Sig=254,8 Ref=360,100

| Peak # | RetTime [min] | Type | Width [min] | Area [mAU*s] | Height [mAU] | Area %  |
|--------|---------------|------|-------------|--------------|--------------|---------|
| 1      | 4.665         | BV   | 0.2691      | 802.34204    | 47.98582     | 50.2221 |
| 2      | 5.370         | VB   | 0.2955      | 795.24573    | 43.46040     | 49.7779 |

Totals : 1597.58777 91.44622

Signal 3: DAD1 C, Sig=210,8 Ref=360,100

| Peak # | RetTime [min] | Type | Width [min] | Area [mAU*s] | Height [mAU] | Area %  |
|--------|---------------|------|-------------|--------------|--------------|---------|
| 1      | 4.665         | VV   | 0.2716      | 1.28859e4    | 776.54736    | 49.7657 |
| 2      | 5.370         | VB   | 0.2968      | 1.30072e4    | 706.37231    | 50.2343 |

Totals : 2.58931e4 1482.91968

Signal 4: DAD1 D, Sig=220,2 Ref=360,100

| Peak # | RetTime [min] | Type | Width [min] | Area [mAU*s] | Height [mAU] | Area %  |
|--------|---------------|------|-------------|--------------|--------------|---------|
| 1      | 4.665         | VV   | 0.2714      | 5607.98193   | 338.36771    | 49.5758 |
| 2      | 5.370         | VB   | 0.2990      | 5703.94824   | 306.59711    | 50.4242 |



Sample Name: 2-68

## S37

=====  
Area Percent Report  
=====

Sorted By : Signal  
Multiplier: : 1.0000  
Dilution: : 1.0000  
Use Multiplier & Dilution Factor with ISTDs

Signal 1: DAD1 A, Sig=230,4 Ref=360,100

| Peak # | RetTime [min] | Type | Width [min] | Area [mAU*s] | Height [mAU] | Area %  |
|--------|---------------|------|-------------|--------------|--------------|---------|
| 1      | 4.683         | VV   | 0.2669      | 4066.69287   | 248.51657    | 98.1083 |
| 2      | 5.402         | VB   | 0.2858      | 78.41167     | 3.54871      | 1.8917  |

Totals : 4145.10455 252.06528

Signal 2: DAD1 B, Sig=254,8 Ref=360,100

| Peak # | RetTime [min] | Type | Width [min] | Area [mAU*s] | Height [mAU] | Area %   |
|--------|---------------|------|-------------|--------------|--------------|----------|
| 1      | 4.683         | BB   | 0.2689      | 1559.88306   | 94.32883     | 100.0000 |

Totals : 1559.88306 94.32883

Signal 3: DAD1 C, Sig=210,8 Ref=360,100

| Peak # | RetTime [min] | Type | Width [min] | Area [mAU*s] | Height [mAU] | Area %  |
|--------|---------------|------|-------------|--------------|--------------|---------|
| 1      | 4.683         | VV   | 0.2764      | 2.45325e4    | 1442.68994   | 98.7987 |
| 2      | 5.385         | VB   | 0.2936      | 298.29437    | 15.70225     | 1.2013  |

Totals : 2.48308e4 1458.39219

Signal 4: DAD1 D, Sig=220,2 Ref=360,100

| Peak # | RetTime [min] | Type | Width [min] | Area [mAU*s] | Height [mAU] | Area %  |
|--------|---------------|------|-------------|--------------|--------------|---------|
| 1      | 4.683         | VV   | 0.2686      | 1.07032e4    | 648.33990    | 98.6086 |
| 2      | 5.393         | VB   | 0.2860      | 151.02109    | 7.59356      | 1.3914  |



S39

=====  
Area Percent Report  
=====

Sorted By : Signal  
Multiplier: : 1.0000  
Dilution: : 1.0000  
Use Multiplier & Dilution Factor with ISTDs

Signal 1: DAD1 A, Sig=230,4 Ref=360,100

| Peak # | RetTime [min] | Type | Width [min] | Area [mAU*s] | Height [mAU] | Area %  |
|--------|---------------|------|-------------|--------------|--------------|---------|
| 1      | 5.193         | BB   | 0.2362      | 3069.68823   | 200.92946    | 49.8528 |
| 2      | 6.503         | BB   | 0.2670      | 3087.81689   | 177.44810    | 50.1472 |

Totals : 6157.50513 378.37756

Signal 2: DAD1 B, Sig=254,8 Ref=360,100

| Peak # | RetTime [min] | Type | Width [min] | Area [mAU*s] | Height [mAU] | Area %  |
|--------|---------------|------|-------------|--------------|--------------|---------|
| 1      | 5.192         | BB   | 0.2333      | 1082.99243   | 71.27363     | 49.3287 |
| 2      | 6.502         | BB   | 0.2661      | 1112.46741   | 64.21096     | 50.6713 |

Totals : 2195.45984 135.48459

Signal 3: DAD1 C, Sig=210,8 Ref=360,100

| Peak # | RetTime [min] | Type | Width [min] | Area [mAU*s] | Height [mAU] | Area %  |
|--------|---------------|------|-------------|--------------|--------------|---------|
| 1      | 5.193         | VV   | 0.2449      | 2.05857e4    | 1312.83765   | 49.7404 |
| 2      | 6.503         | VB   | 0.2729      | 2.08006e4    | 1173.01880   | 50.2596 |

Totals : 4.13862e4 2485.85645

Signal 4: DAD1 D, Sig=220,2 Ref=360,100

| Peak # | RetTime [min] | Type | Width [min] | Area [mAU*s] | Height [mAU] | Area %  |
|--------|---------------|------|-------------|--------------|--------------|---------|
| 1      | 5.193         | VB   | 0.2356      | 9387.53906   | 616.82281    | 49.6132 |
| 2      | 6.503         | VB   | 0.2674      | 9533.92676   | 546.81897    | 50.3868 |





Sample Name: 2-87

## S41

=====  
Area Percent Report  
=====

Sorted By : Signal  
Multiplier: : 1.0000  
Dilution: : 1.0000  
Use Multiplier & Dilution Factor with ISTDs

Signal 1: DAD1 A, Sig=230,4 Ref=360,100

| Peak # | RetTime [min] | Type | Width [min] | Area [mAU*s] | Height [mAU] | Area %  |
|--------|---------------|------|-------------|--------------|--------------|---------|
| 1      | 5.189         | BB   | 0.2353      | 4730.73340   | 311.31937    | 99.5199 |
| 2      | 6.517         | BV   | 0.2048      | 22.82083     | 1.35311      | 0.4801  |

Totals : 4753.55423 312.67248

Signal 2: DAD1 B, Sig=254,8 Ref=360,100

| Peak # | RetTime [min] | Type | Width [min] | Area [mAU*s] | Height [mAU] | Area %  |
|--------|---------------|------|-------------|--------------|--------------|---------|
| 1      | 5.188         | BB   | 0.2325      | 1669.35730   | 110.33447    | 99.4570 |
| 2      | 6.504         | MM   | 0.2897      | 9.11390      | 5.24339e-1   | 0.5430  |

Totals : 1678.47120 110.85881

Signal 3: DAD1 C, Sig=210,8 Ref=360,100

| Peak # | RetTime [min] | Type | Width [min] | Area [mAU*s] | Height [mAU] | Area %  |
|--------|---------------|------|-------------|--------------|--------------|---------|
| 1      | 5.191         | VB   | 0.2566      | 2.97104e4    | 1818.34412   | 99.5819 |
| 2      | 6.499         | BB   | 0.2424      | 124.72652    | 7.88918      | 0.4181  |

Totals : 2.98352e4 1826.23330

Signal 4: DAD1 D, Sig=220,2 Ref=360,100

| Peak # | RetTime [min] | Type | Width [min] | Area [mAU*s] | Height [mAU] | Area %  |
|--------|---------------|------|-------------|--------------|--------------|---------|
| 1      | 5.188         | VB   | 0.2367      | 1.44311e4    | 942.09601    | 99.6140 |
| 2      | 6.509         | BV   | 0.1972      | 55.92188     | 3.56149      | 0.3860  |



S43

=====  
Area Percent Report  
=====

Sorted By : Signal  
Multiplier: : 1.0000  
Dilution: : 1.0000  
Use Multiplier & Dilution Factor with ISTDs

Signal 1: DAD1 A, Sig=230,4 Ref=360,100

| Peak # | RetTime [min] | Type | Width [min] | Area [mAU*s] | Height [mAU] | Area %  |
|--------|---------------|------|-------------|--------------|--------------|---------|
| 1      | 5.185         | BB   | 0.2352      | 6844.63623   | 450.68427    | 93.7745 |
| 2      | 6.487         | BB   | 0.2555      | 454.40448    | 27.69054     | 6.2255  |

Totals : 7299.04071 478.37481

Signal 2: DAD1 B, Sig=254,8 Ref=360,100

| Peak # | RetTime [min] | Type | Width [min] | Area [mAU*s] | Height [mAU] | Area %  |
|--------|---------------|------|-------------|--------------|--------------|---------|
| 1      | 5.185         | BB   | 0.2350      | 2429.10376   | 160.12840    | 93.9193 |
| 2      | 6.488         | BB   | 0.2543      | 157.26839    | 9.74409      | 6.0807  |

Totals : 2586.37215 169.87249

Signal 3: DAD1 C, Sig=210,8 Ref=360,100

| Peak # | RetTime [min] | Type | Width [min] | Area [mAU*s] | Height [mAU] | Area %  |
|--------|---------------|------|-------------|--------------|--------------|---------|
| 1      | 5.188         | VV   | 0.2932      | 3.86796e4    | 2116.97021   | 91.8196 |
| 2      | 6.486         | VB   | 0.2677      | 3419.77539   | 195.81833    | 8.1180  |
| 3      | 20.529        | BB   | 0.2896      | 26.26858     | 1.12024      | 0.0624  |

Totals : 4.21256e4 2313.90878

Signal 4: DAD1 D, Sig=220,2 Ref=360,100

Sample Name: 2-36RAC

S44

```

=====
Acq. Operator   : SZ                               Seq. Line :    4
Acq. Instrument : Instrument 1                     Location  : Vial 63
Injection Date  : 9/5/2013 2:36:19 AM             Inj       :    1
                                                    Inj Volume: 5 µl
Different Inj Volume from Sequence !   Actual Inj Volume : 3 µl
Acq. Method    : C:\CHEM32\1\DATA\ZHU\HPLC 2013-09-04 23-29-06\AD-H10-60ETOH.M
Last changed   : 9/5/2013 3:08:39 AM by SZ
                (modified after loading)
Analysis Method : C:\CHEM32\1\METHODS\AD-H20-60ETOH.M
Last changed   : 9/4/2013 11:04:44 AM by SZ
  
```

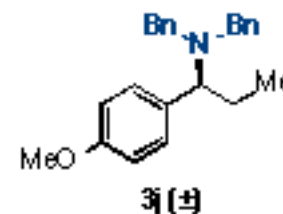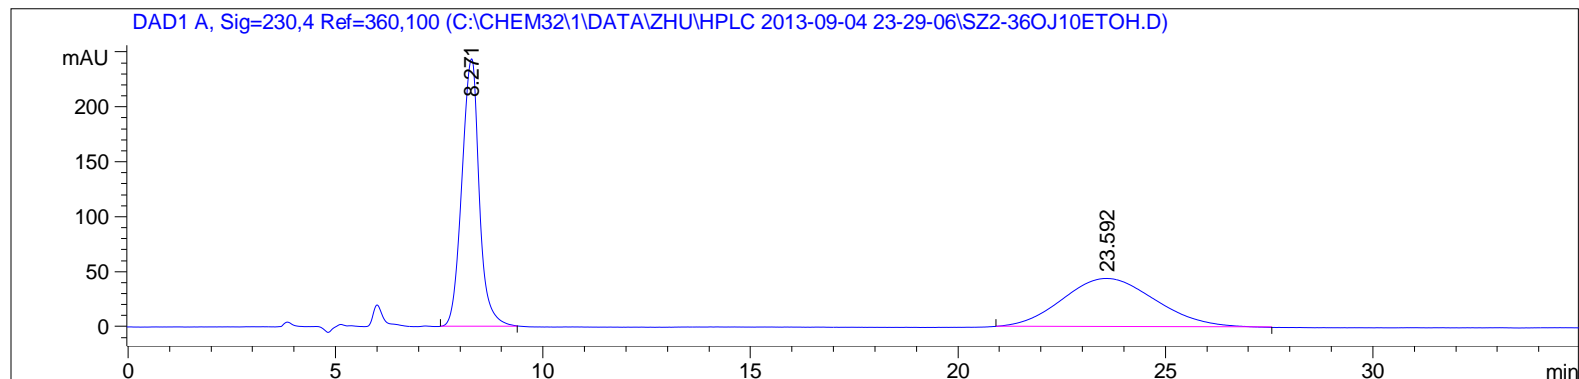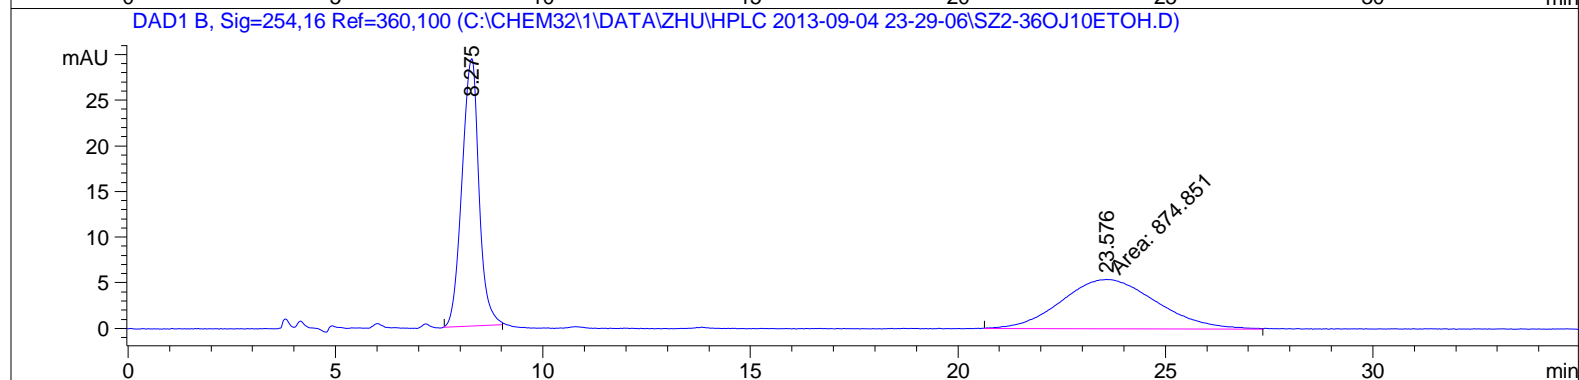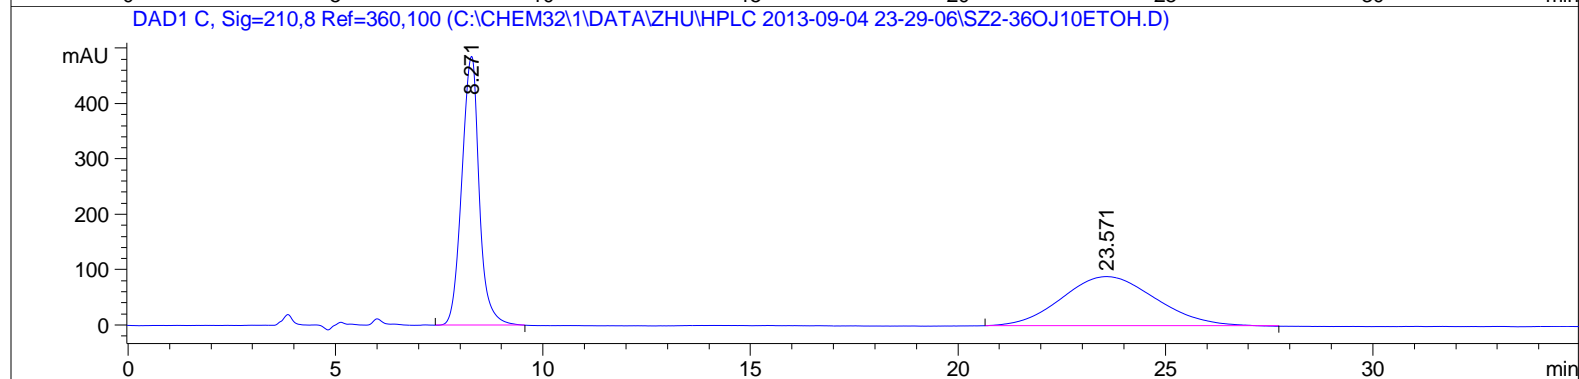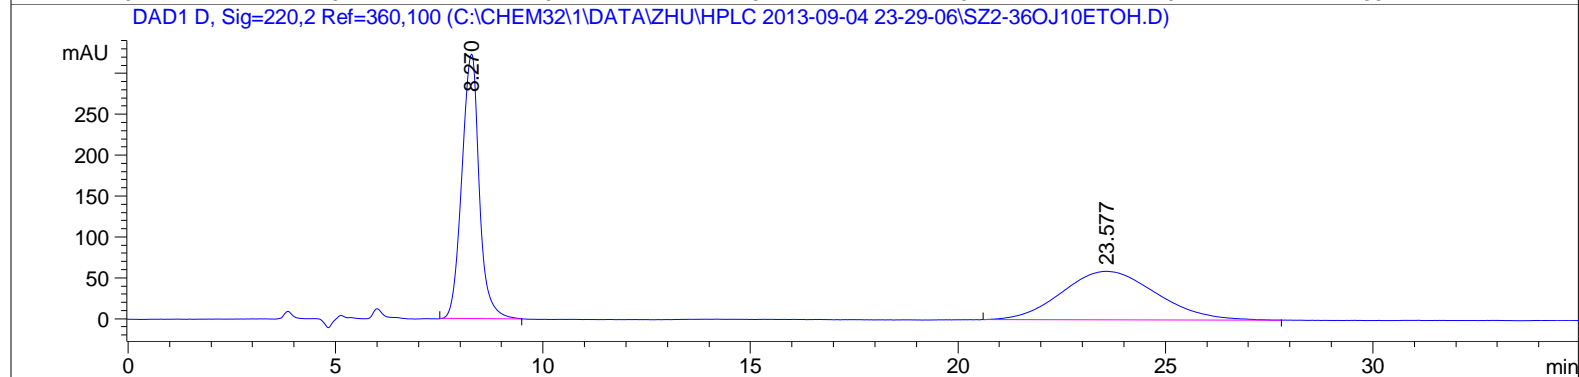

### S45

=====  
Area Percent Report  
=====

Sorted By : Signal  
Multiplier: : 1.0000  
Dilution: : 1.0000  
Use Multiplier & Dilution Factor with ISTDs

Signal 1: DAD1 A, Sig=230,4 Ref=360,100

| Peak # | RetTime [min] | Type | Width [min] | Area [mAU*s] | Height [mAU] | Area %  |
|--------|---------------|------|-------------|--------------|--------------|---------|
| 1      | 8.271         | BB   | 0.4498      | 7096.02930   | 243.62386    | 50.7004 |
| 2      | 23.592        | BB   | 1.8358      | 6899.96729   | 44.04289     | 49.2996 |

Totals : 1.39960e4 287.66674

Signal 2: DAD1 B, Sig=254,16 Ref=360,100

| Peak # | RetTime [min] | Type | Width [min] | Area [mAU*s] | Height [mAU] | Area %  |
|--------|---------------|------|-------------|--------------|--------------|---------|
| 1      | 8.275         | BB   | 0.4407      | 835.61371    | 29.30439     | 48.8530 |
| 2      | 23.576        | MM   | 2.6791      | 874.85114    | 5.44249      | 51.1470 |

Totals : 1710.46484 34.74688

Signal 3: DAD1 C, Sig=210,8 Ref=360,100

| Peak # | RetTime [min] | Type | Width [min] | Area [mAU*s] | Height [mAU] | Area %  |
|--------|---------------|------|-------------|--------------|--------------|---------|
| 1      | 8.271         | VB   | 0.4486      | 1.41796e4    | 485.75226    | 50.0589 |
| 2      | 23.571        | BB   | 1.8556      | 1.41463e4    | 89.23178     | 49.9411 |

Totals : 2.83259e4 574.98404

Signal 4: DAD1 D, Sig=220,2 Ref=360,100

| Peak # | RetTime [min] | Type | Width [min] | Area [mAU*s] | Height [mAU] | Area %  |
|--------|---------------|------|-------------|--------------|--------------|---------|
| 1      | 8.270         | BB   | 0.4465      | 9449.85059   | 323.76794    | 50.0086 |
| 2      | 23.577        | BB   | 1.8590      | 9446.60156   | 59.47604     | 49.9914 |



S47

=====  
Area Percent Report  
=====

Sorted By : Signal  
Multiplier: : 1.0000  
Dilution: : 1.0000  
Use Multiplier & Dilution Factor with ISTDs

Signal 1: DAD1 A, Sig=230,4 Ref=360,100

| Peak # | RetTime [min] | Type | Width [min] | Area [mAU*s] | Height [mAU] | Area %   |
|--------|---------------|------|-------------|--------------|--------------|----------|
| 1      | 8.243         | BB   | 0.4702      | 1.28096e4    | 424.29019    | 100.0000 |

Totals : 1.28096e4 424.29019

Signal 2: DAD1 B, Sig=254,16 Ref=360,100

| Peak # | RetTime [min] | Type | Width [min] | Area [mAU*s] | Height [mAU] | Area %   |
|--------|---------------|------|-------------|--------------|--------------|----------|
| 1      | 8.243         | BB   | 0.4600      | 1517.36401   | 50.87385     | 100.0000 |

Totals : 1517.36401 50.87385

Signal 3: DAD1 C, Sig=210,8 Ref=360,100

| Peak # | RetTime [min] | Type | Width [min] | Area [mAU*s] | Height [mAU] | Area %   |
|--------|---------------|------|-------------|--------------|--------------|----------|
| 1      | 8.242         | BB   | 0.4717      | 2.55234e4    | 841.87476    | 100.0000 |

Totals : 2.55234e4 841.87476

Signal 4: DAD1 D, Sig=220,2 Ref=360,100

| Peak # | RetTime [min] | Type | Width [min] | Area [mAU*s] | Height [mAU] | Area %   |
|--------|---------------|------|-------------|--------------|--------------|----------|
| 1      | 8.242         | BB   | 0.4709      | 1.70559e4    | 563.78186    | 100.0000 |

Totals : 1.70559e4 563.78186





### S49

=====  
Area Percent Report  
=====

Sorted By : Signal  
Multiplier: : 1.0000  
Dilution: : 1.0000  
Use Multiplier & Dilution Factor with ISTDs

Signal 1: DAD1 A, Sig=230,4 Ref=360,100

| Peak # | RetTime [min] | Type | Width [min] | Area [mAU*s] | Height [mAU] | Area %  |
|--------|---------------|------|-------------|--------------|--------------|---------|
| 1      | 6.052         | BB   | 0.2736      | 2575.10693   | 140.67589    | 53.3483 |
| 2      | 7.049         | BB   | 0.2769      | 2251.86768   | 124.58786    | 46.6517 |

Totals : 4826.97461 265.26375

Signal 2: DAD1 B, Sig=254,8 Ref=360,100

| Peak # | RetTime [min] | Type | Width [min] | Area [mAU*s] | Height [mAU] | Area %  |
|--------|---------------|------|-------------|--------------|--------------|---------|
| 1      | 6.051         | BB   | 0.2457      | 780.34070    | 49.02531     | 49.9033 |
| 2      | 7.050         | BB   | 0.2715      | 783.36597    | 44.48231     | 50.0967 |

Totals : 1563.70667 93.50762

Signal 3: DAD1 C, Sig=210,8 Ref=360,100

| Peak # | RetTime [min] | Type | Width [min] | Area [mAU*s] | Height [mAU] | Area %  |
|--------|---------------|------|-------------|--------------|--------------|---------|
| 1      | 6.051         | VV   | 0.2538      | 1.41525e4    | 851.76758    | 50.4456 |
| 2      | 7.049         | VB   | 0.2805      | 1.39025e4    | 770.35675    | 49.5544 |

Totals : 2.80549e4 1622.12433

Signal 4: DAD1 D, Sig=220,4 Ref=360,100

| Peak # | RetTime [min] | Type | Width [min] | Area [mAU*s] | Height [mAU] | Area %  |
|--------|---------------|------|-------------|--------------|--------------|---------|
| 1      | 6.051         | VV   | 0.2561      | 6224.86963   | 370.35016    | 50.9587 |
| 2      | 7.049         | VB   | 0.2783      | 5990.64307   | 332.38031    | 49.0413 |

Sample Name: 2-92

## S50

=====

Acq. Operator : RZ  
Acq. Instrument : Instrument 1  
Injection Date : 8/25/2013 7:57:29 PM

Seq. Line : 2  
Location : Vial 61  
Inj : 1  
Inj Volume : 5 µl  
Actual Inj Volume : 4 µl

Different Inj Volume from Sequence !

Acq. Method : C:\CHEM32\1\DATA\ZHU\HPLC 2013-08-25 19-24-02\AD-H03-30.M  
Last changed : 7/15/2013 8:52:24 PM by SHU  
Analysis Method : C:\CHEM32\1\METHODS\AD-H20-60ETOH.M  
Last changed : 9/6/2013 12:38:52 PM by SZ  
(modified after loading)

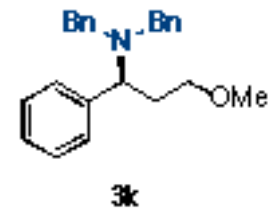

1 mmol-scale

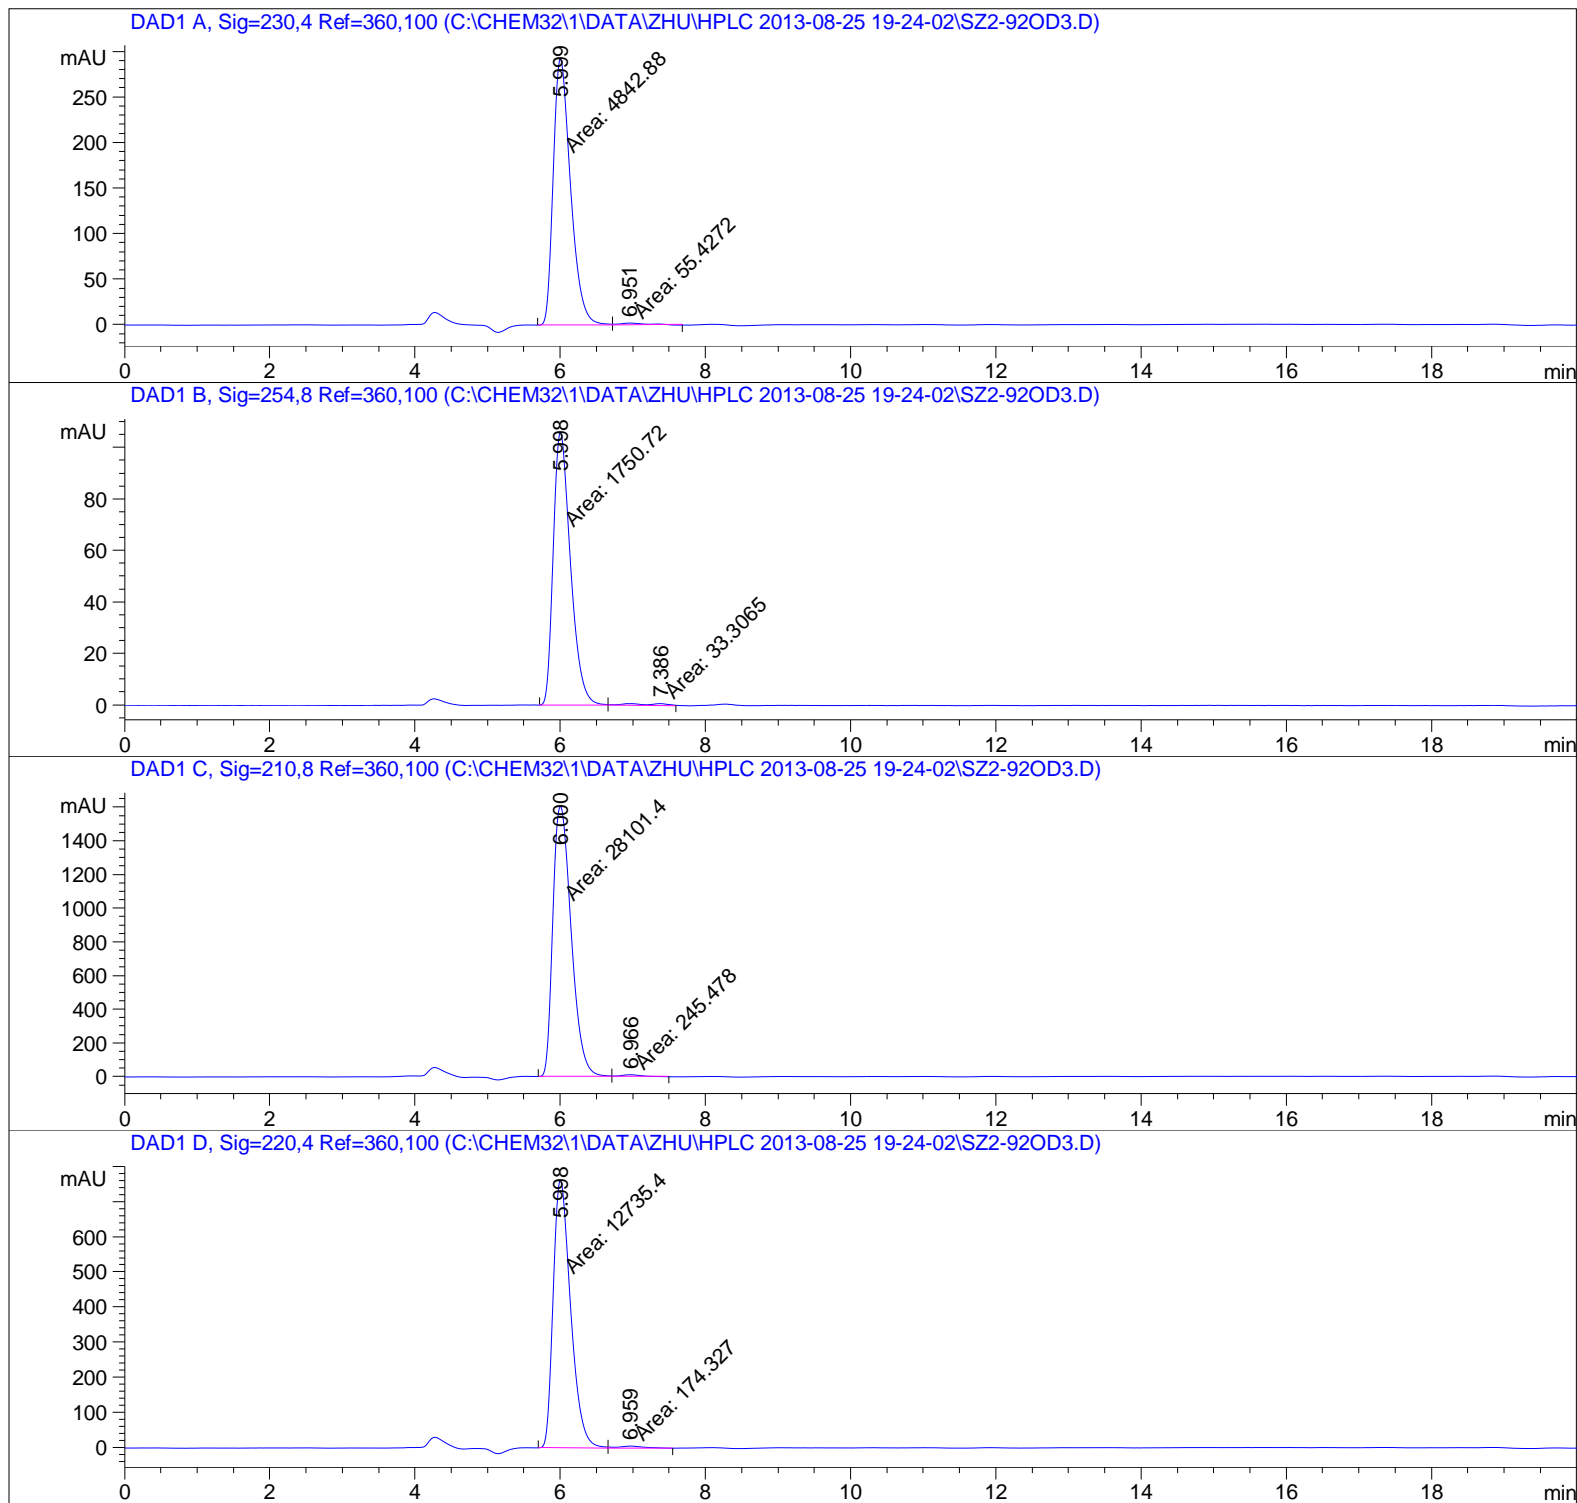

Sample Name: 2-92

## S51

=====  
Area Percent Report  
=====

Sorted By : Signal  
Multiplier: : 1.0000  
Dilution: : 1.0000  
Use Multiplier & Dilution Factor with ISTDs

Signal 1: DAD1 A, Sig=230,4 Ref=360,100

| Peak # | RetTime [min] | Type | Width [min] | Area [mAU*s] | Height [mAU] | Area %  |
|--------|---------------|------|-------------|--------------|--------------|---------|
| 1      | 5.999         | MF   | 0.2761      | 4842.87744   | 292.37421    | 98.8684 |
| 2      | 6.951         | FM   | 0.4399      | 55.42721     | 2.10015      | 1.1316  |

Totals : 4898.30465 294.47436

Signal 2: DAD1 B, Sig=254,8 Ref=360,100

| Peak # | RetTime [min] | Type | Width [min] | Area [mAU*s] | Height [mAU] | Area %  |
|--------|---------------|------|-------------|--------------|--------------|---------|
| 1      | 5.998         | MF   | 0.2753      | 1750.71960   | 106.00282    | 98.1331 |
| 2      | 7.386         | FM   | 0.6368      | 33.30647     | 8.71706e-1   | 1.8669  |

Totals : 1784.02608 106.87452

Signal 3: DAD1 C, Sig=210,8 Ref=360,100

| Peak # | RetTime [min] | Type | Width [min] | Area [mAU*s] | Height [mAU] | Area %  |
|--------|---------------|------|-------------|--------------|--------------|---------|
| 1      | 6.000         | MF   | 0.2921      | 2.81014e4    | 1603.61926   | 99.1340 |
| 2      | 6.966         | FM   | 0.3587      | 245.47841    | 11.40637     | 0.8660  |

Totals : 2.83469e4 1615.02564

Signal 4: DAD1 D, Sig=220,4 Ref=360,100

| Peak # | RetTime [min] | Type | Width [min] | Area [mAU*s] | Height [mAU] | Area %  |
|--------|---------------|------|-------------|--------------|--------------|---------|
| 1      | 5.998         | MF   | 0.2785      | 1.27354e4    | 762.25610    | 98.6496 |
| 2      | 6.959         | FM   | 0.4622      | 174.32750    | 6.28653      | 1.3504  |

Sample Name: 2-155

### S52

```

=====
Acq. Operator   : SZ                               Seq. Line :    9
Acq. Instrument : Instrument 1                     Location  : Vial 71
Injection Date  : 9/6/2013 7:25:16 AM             Inj       :    1
                                                    Inj Volume: 5 µl
Different Inj Volume from Sequence !   Actual Inj Volume : 2 µl
Acq. Method     : C:\CHEM32\1\DATA\ZHU\HPLC 2013-09-06 03-13-10\AD-H03-30.M
Last changed    : 7/15/2013 8:52:24 PM by SHU
Analysis Method : C:\CHEM32\1\METHODS\AD-H20-60ETOH.M
Last changed    : 9/4/2013 11:04:44 AM by SZ
  
```

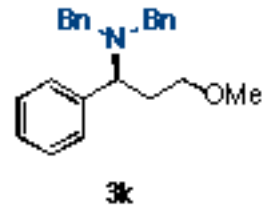

10 mmol-scale  
1% Copper

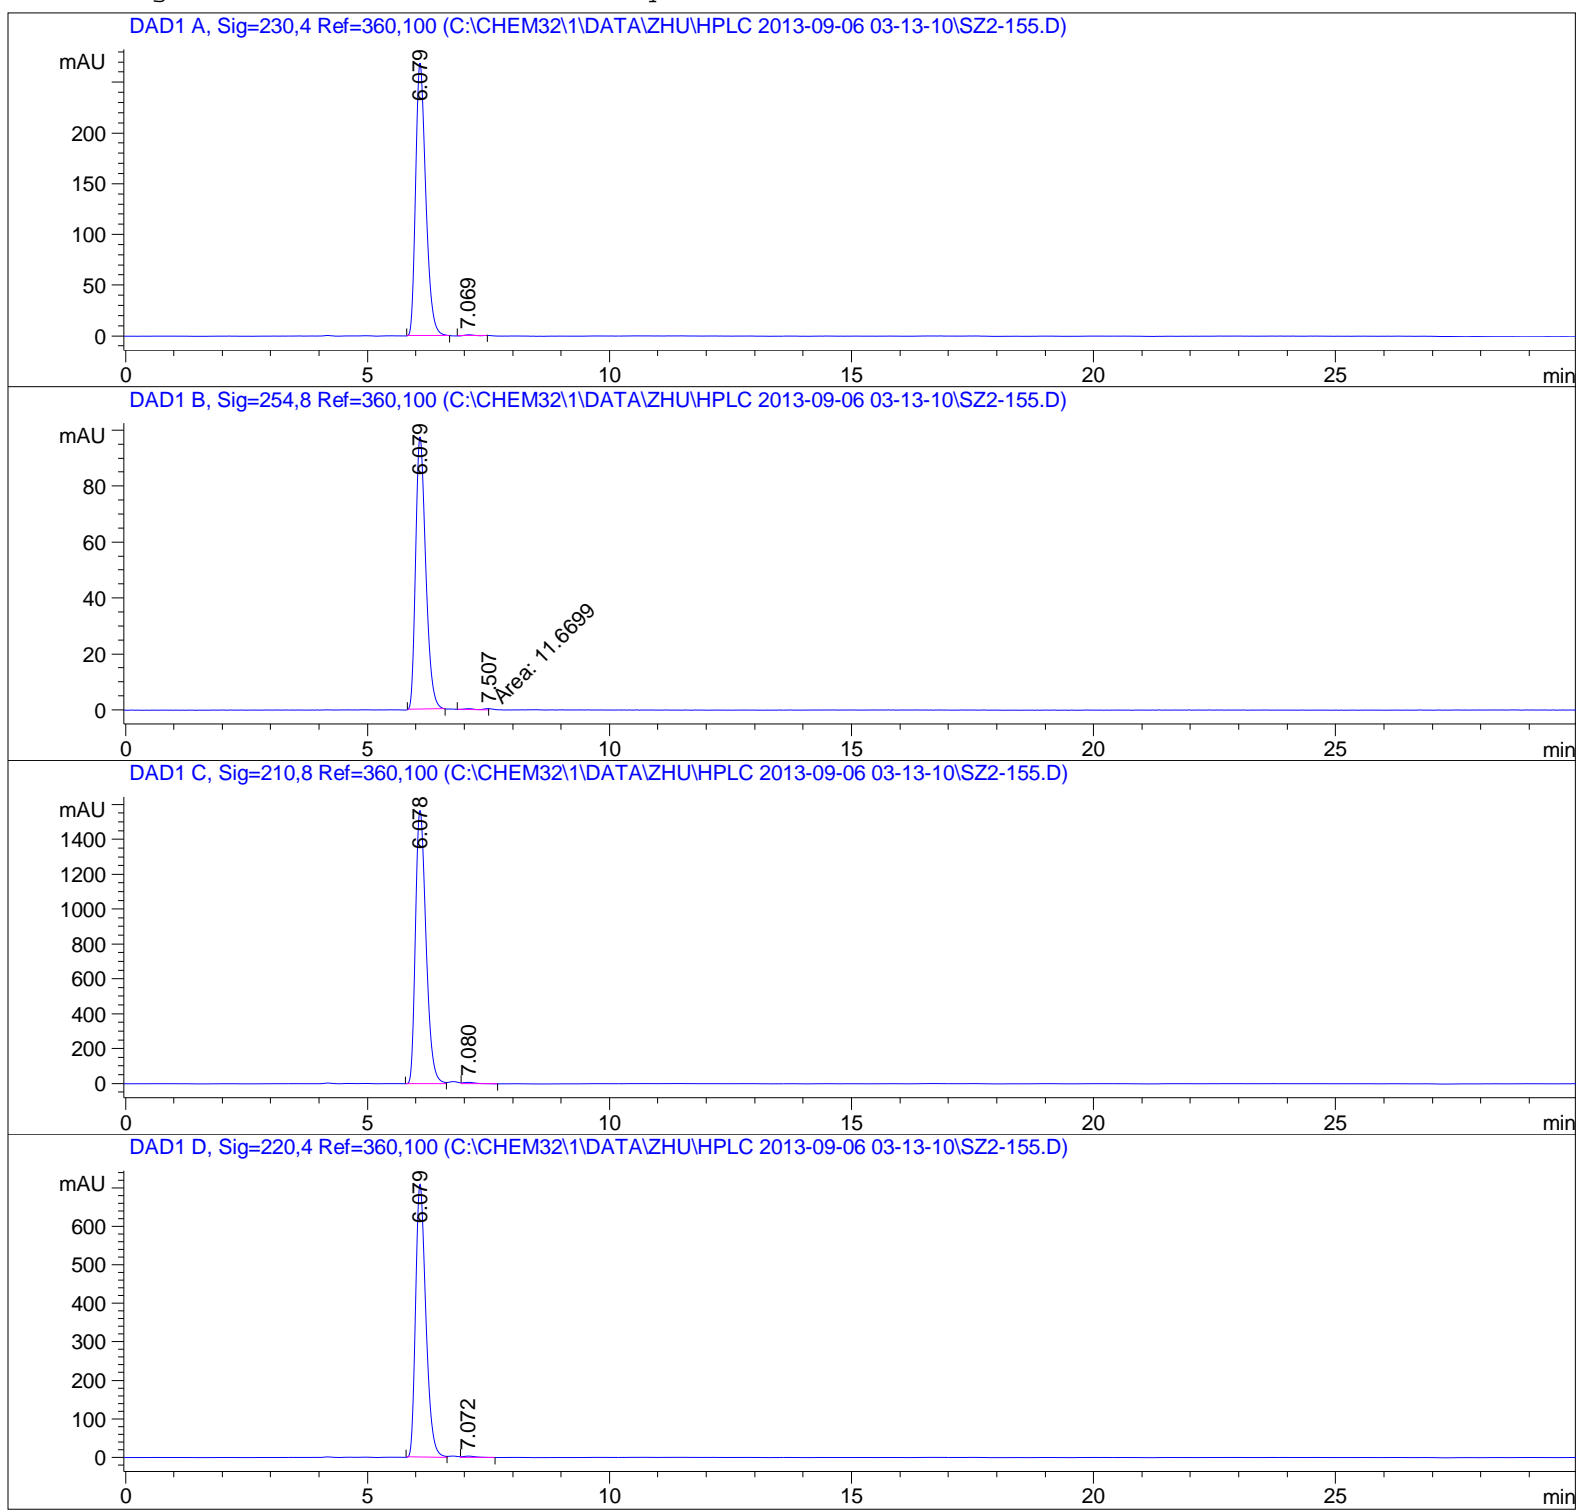

Sample Name: 2-155

## S53

=====  
Area Percent Report  
=====

Sorted By : Signal  
Multiplier: : 1.0000  
Dilution: : 1.0000  
Use Multiplier & Dilution Factor with ISTDs

Signal 1: DAD1 A, Sig=230,4 Ref=360,100

| Peak # | RetTime [min] | Type | Width [min] | Area [mAU*s] | Height [mAU] | Area %  |
|--------|---------------|------|-------------|--------------|--------------|---------|
| 1      | 6.079         | BB   | 0.2239      | 3916.92163   | 268.90894    | 99.5534 |
| 2      | 7.069         | BB   | 0.2091      | 17.57214     | 1.05054      | 0.4466  |

Totals : 3934.49377 269.95948

Signal 2: DAD1 B, Sig=254,8 Ref=360,100

| Peak # | RetTime [min] | Type | Width [min] | Area [mAU*s] | Height [mAU] | Area %  |
|--------|---------------|------|-------------|--------------|--------------|---------|
| 1      | 6.079         | BB   | 0.2232      | 1413.53027   | 97.49124     | 99.1812 |
| 2      | 7.507         | MM   | 0.3147      | 11.66986     | 6.18111e-1   | 0.8188  |

Totals : 1425.20013 98.10935

Signal 3: DAD1 C, Sig=210,8 Ref=360,100

| Peak # | RetTime [min] | Type | Width [min] | Area [mAU*s] | Height [mAU] | Area %  |
|--------|---------------|------|-------------|--------------|--------------|---------|
| 1      | 6.078         | BV   | 0.2345      | 2.37060e4    | 1566.89124   | 99.3585 |
| 2      | 7.080         | VB   | 0.2634      | 153.06528    | 8.36822      | 0.6415  |

Totals : 2.38591e4 1575.25945

Signal 4: DAD1 D, Sig=220,4 Ref=360,100

| Peak # | RetTime [min] | Type | Width [min] | Area [mAU*s] | Height [mAU] | Area %  |
|--------|---------------|------|-------------|--------------|--------------|---------|
| 1      | 6.079         | BV   | 0.2275      | 1.04387e4    | 709.99329    | 99.4149 |
| 2      | 7.072         | VB   | 0.2239      | 61.43413     | 3.41418      | 0.5851  |

Sample Name: 1-293rac

S54

=====

|                                                                         |                          |
|-------------------------------------------------------------------------|--------------------------|
| Acq. Operator : SZ                                                      | Seq. Line : 5            |
| Acq. Instrument : Instrument 1                                          | Location : Vial 62       |
| Injection Date : 8/11/2013 3:40:15 AM                                   | Inj : 1                  |
|                                                                         | Inj Volume : 5 µl        |
| Different Inj Volume from Sequence !                                    | Actual Inj Volume : 4 µl |
| Acq. Method : C:\CHEM32\1\DATA\ZHU\HPLC 2013-08-11 01-32-58\AD-H05-30.M |                          |
| Last changed : 8/7/2013 11:47:17 AM by RZ                               |                          |
| Analysis Method : C:\CHEM32\1\METHODS\AD-H20-60ETOH.M                   |                          |
| Last changed : 9/6/2013 12:38:52 PM by SZ                               |                          |

(modified after loading)

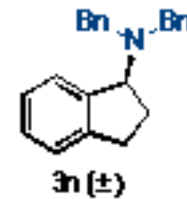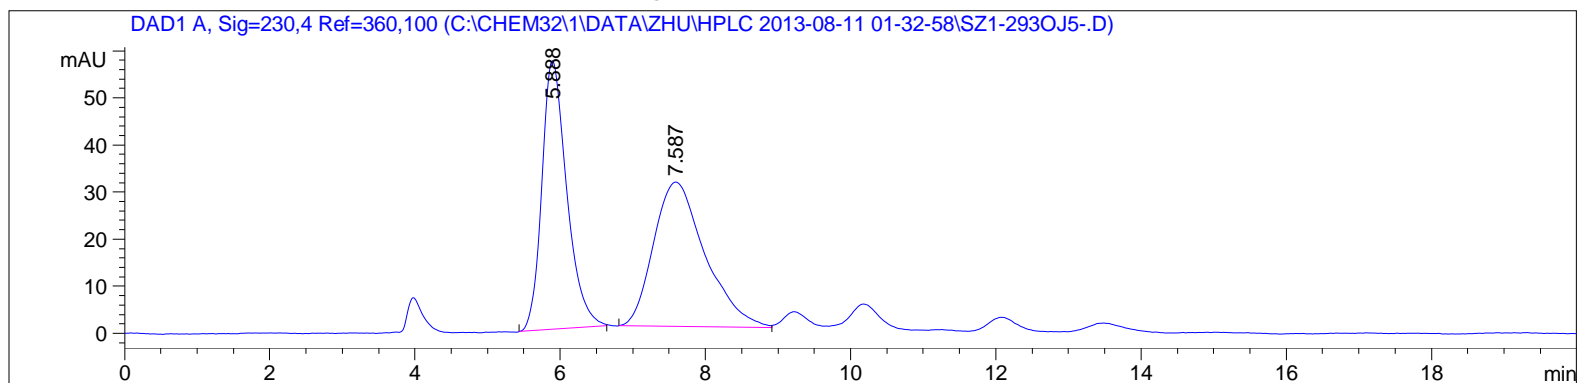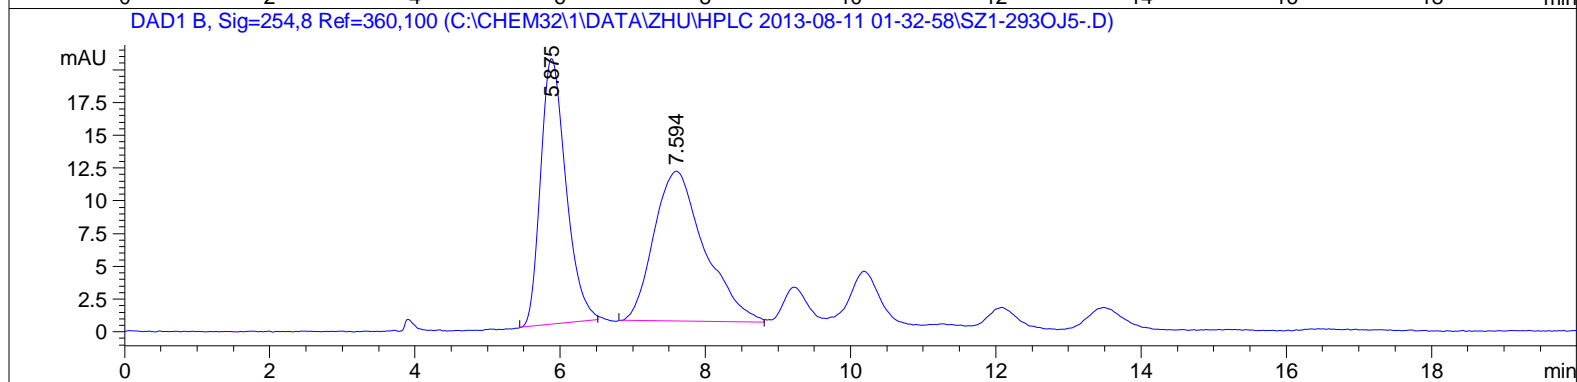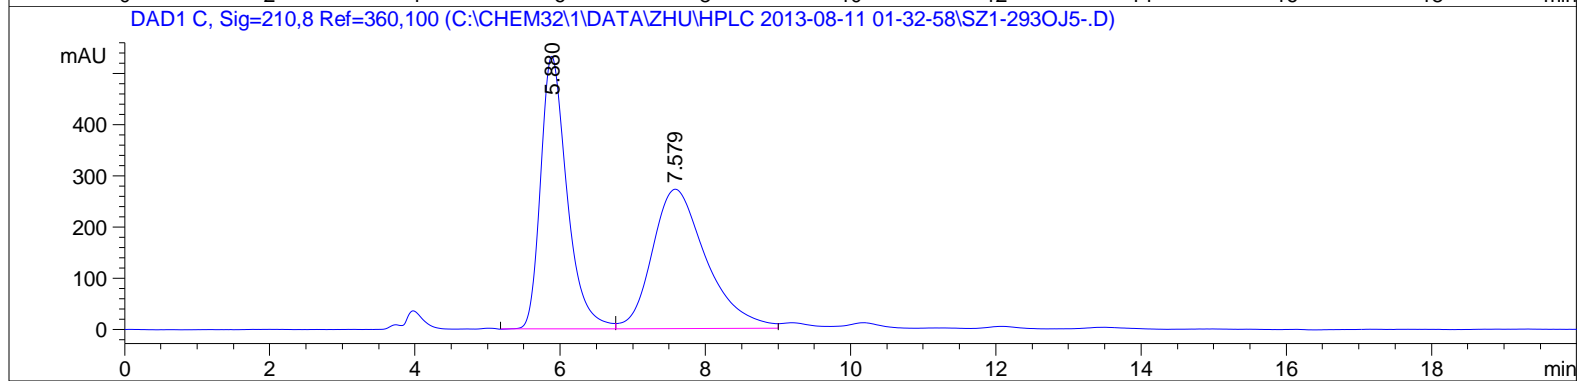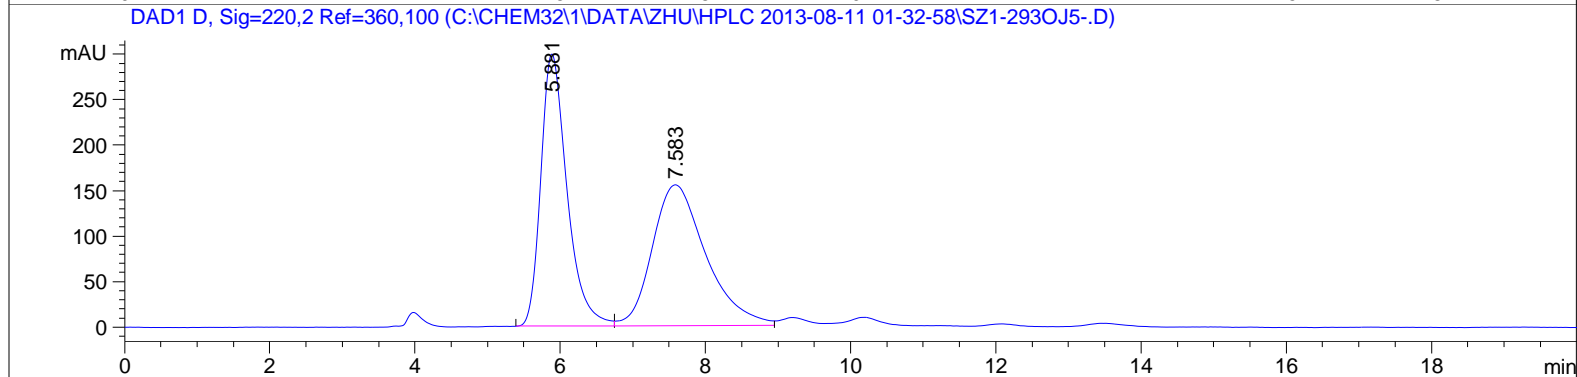

S55

=====  
Area Percent Report  
=====

Sorted By : Signal  
Multiplier: : 1.0000  
Dilution: : 1.0000  
Use Multiplier & Dilution Factor with ISTDs

Signal 1: DAD1 A, Sig=230,4 Ref=360,100

| Peak # | RetTime [min] | Type | Width [min] | Area [mAU*s] | Height [mAU] | Area %  |
|--------|---------------|------|-------------|--------------|--------------|---------|
| 1      | 5.888         | BB   | 0.3592      | 1365.44495   | 57.06235     | 47.4516 |
| 2      | 7.587         | BB   | 0.6871      | 1512.10718   | 30.67488     | 52.5484 |

Totals : 2877.55212 87.73723

Signal 2: DAD1 B, Sig=254,8 Ref=360,100

| Peak # | RetTime [min] | Type | Width [min] | Area [mAU*s] | Height [mAU] | Area %  |
|--------|---------------|------|-------------|--------------|--------------|---------|
| 1      | 5.875         | BB   | 0.3694      | 492.94131    | 20.29181     | 46.9579 |
| 2      | 7.594         | BB   | 0.6245      | 556.81049    | 11.46614     | 53.0421 |

Totals : 1049.75180 31.75795

Signal 3: DAD1 C, Sig=210,8 Ref=360,100

| Peak # | RetTime [min] | Type | Width [min] | Area [mAU*s] | Height [mAU] | Area %  |
|--------|---------------|------|-------------|--------------|--------------|---------|
| 1      | 5.880         | VV   | 0.3834      | 1.34774e4    | 532.35504    | 48.8098 |
| 2      | 7.579         | VB   | 0.7611      | 1.41346e4    | 272.51981    | 51.1902 |

Totals : 2.76120e4 804.87485

Signal 4: DAD1 D, Sig=220,2 Ref=360,100

| Peak # | RetTime [min] | Type | Width [min] | Area [mAU*s] | Height [mAU] | Area %  |
|--------|---------------|------|-------------|--------------|--------------|---------|
| 1      | 5.881         | BV   | 0.3791      | 7514.94385   | 299.17673    | 48.4161 |
| 2      | 7.583         | VB   | 0.7535      | 8006.64990   | 155.30820    | 51.5839 |

Sample Name: 2-49

### S56

=====

|                                                                         |                          |
|-------------------------------------------------------------------------|--------------------------|
| Acq. Operator : SZ                                                      | Seq. Line : 3            |
| Acq. Instrument : Instrument 1                                          | Location : Vial 61       |
| Injection Date : 8/11/2013 2:37:29 AM                                   | Inj : 1                  |
|                                                                         | Inj Volume : 5 µl        |
| Different Inj Volume from Sequence !                                    | Actual Inj Volume : 4 µl |
| Acq. Method : C:\CHEM32\1\DATA\ZHU\HPLC 2013-08-11 01-32-58\AD-H05-30.M |                          |
| Last changed : 8/7/2013 11:47:17 AM by RZ                               |                          |
| Analysis Method : C:\CHEM32\1\METHODS\AD-H20-60ETOH.M                   |                          |
| Last changed : 9/6/2013 12:38:52 PM by SZ                               |                          |

(modified after loading)

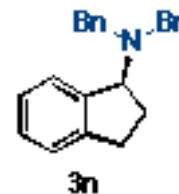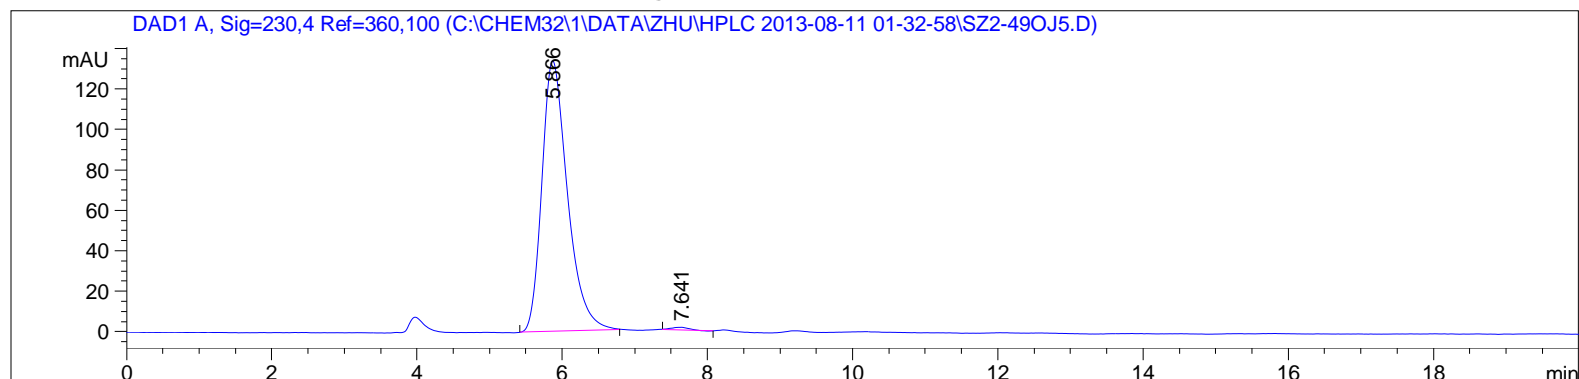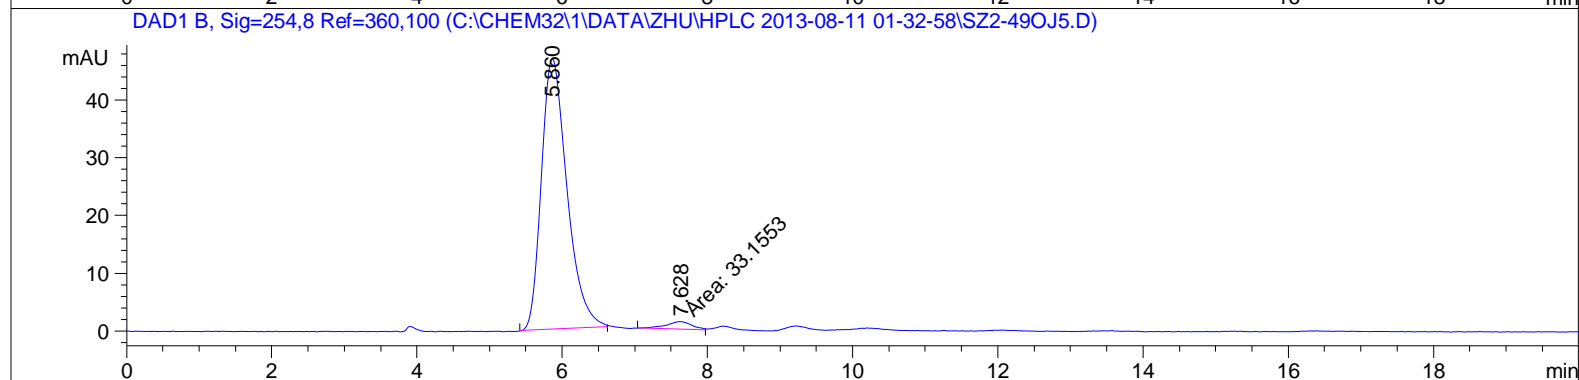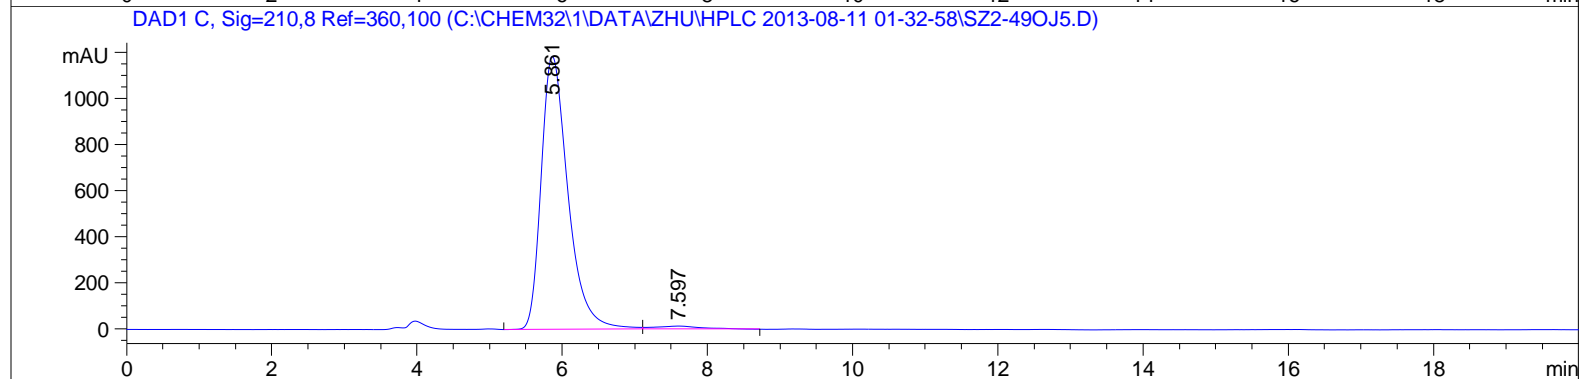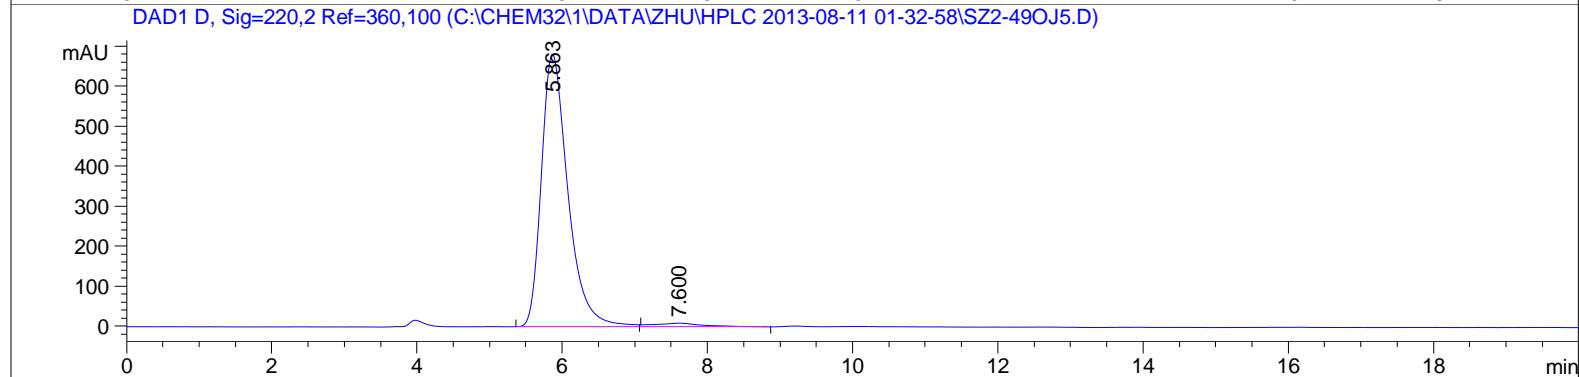



Sample Name: 2-49

## S57

=====  
Area Percent Report  
=====

Sorted By : Signal  
Multiplier: : 1.0000  
Dilution: : 1.0000  
Use Multiplier & Dilution Factor with ISTDs

Signal 1: DAD1 A, Sig=230,4 Ref=360,100

| Peak # | RetTime [min] | Type | Width [min] | Area [mAU*s] | Height [mAU] | Area %  |
|--------|---------------|------|-------------|--------------|--------------|---------|
| 1      | 5.866         | BB   | 0.3726      | 3289.06836   | 133.86964    | 99.1659 |
| 2      | 7.641         | BB   | 0.2301      | 27.66391     | 1.48003      | 0.8341  |

Totals : 3316.73227 135.34968

Signal 2: DAD1 B, Sig=254,8 Ref=360,100

| Peak # | RetTime [min] | Type | Width [min] | Area [mAU*s] | Height [mAU] | Area %  |
|--------|---------------|------|-------------|--------------|--------------|---------|
| 1      | 5.860         | BB   | 0.3746      | 1152.72522   | 46.92719     | 97.2042 |
| 2      | 7.628         | MM   | 0.4194      | 33.15527     | 1.31755      | 2.7958  |

Totals : 1185.88049 48.24474

Signal 3: DAD1 C, Sig=210,8 Ref=360,100

| Peak # | RetTime [min] | Type | Width [min] | Area [mAU*s] | Height [mAU] | Area %  |
|--------|---------------|------|-------------|--------------|--------------|---------|
| 1      | 5.861         | VV   | 0.3903      | 3.04912e4    | 1184.74170   | 97.7730 |
| 2      | 7.597         | VB   | 0.5863      | 694.48907    | 14.40850     | 2.2270  |

Totals : 3.11857e4 1199.15020

Signal 4: DAD1 D, Sig=220,2 Ref=360,100

| Peak # | RetTime [min] | Type | Width [min] | Area [mAU*s] | Height [mAU] | Area %  |
|--------|---------------|------|-------------|--------------|--------------|---------|
| 1      | 5.863         | BB   | 0.3881      | 1.72868e4    | 681.10864    | 97.6269 |
| 2      | 7.600         | BB   | 0.5551      | 420.21100    | 9.06069      | 2.3731  |



S59

=====  
Area Percent Report  
=====

Sorted By : Signal  
Multiplier: : 1.0000  
Dilution: : 1.0000  
Use Multiplier & Dilution Factor with ISTDs

Signal 1: DAD1 A, Sig=230,4 Ref=360,100

| Peak # | RetTime [min] | Type | Width [min] | Area [mAU*s] | Height [mAU] | Area %  |
|--------|---------------|------|-------------|--------------|--------------|---------|
| 1      | 5.811         | BB   | 0.4354      | 3422.00732   | 118.33289    | 49.2643 |
| 2      | 7.691         | BB   | 0.8790      | 3524.22021   | 55.34014     | 50.7357 |

Totals : 6946.22754 173.67303

Signal 2: DAD1 B, Sig=254,8 Ref=360,100

| Peak # | RetTime [min] | Type | Width [min] | Area [mAU*s] | Height [mAU] | Area %  |
|--------|---------------|------|-------------|--------------|--------------|---------|
| 1      | 5.812         | BB   | 0.4308      | 789.69830    | 27.52083     | 50.6231 |
| 2      | 7.696         | BB   | 0.7875      | 770.25879    | 12.52384     | 49.3769 |

Totals : 1559.95709 40.04467

Signal 3: DAD1 C, Sig=210,8 Ref=360,100

| Peak # | RetTime [min] | Type | Width [min] | Area [mAU*s] | Height [mAU] | Area %  |
|--------|---------------|------|-------------|--------------|--------------|---------|
| 1      | 5.811         | VV   | 0.4483      | 2.61497e4    | 886.13550    | 48.6427 |
| 2      | 7.690         | VB   | 0.9662      | 2.76089e4    | 421.51959    | 51.3573 |

Totals : 5.37586e4 1307.65509

Signal 4: DAD1 D, Sig=220,4 Ref=360,100

| Peak # | RetTime [min] | Type | Width [min] | Area [mAU*s] | Height [mAU] | Area %  |
|--------|---------------|------|-------------|--------------|--------------|---------|
| 1      | 5.812         | VV   | 0.4485      | 1.60140e4    | 545.46857    | 48.7146 |
| 2      | 7.694         | VB   | 0.9553      | 1.68591e4    | 258.34833    | 51.2854 |



Sample Name: 2-54

## S61

=====  
Area Percent Report  
=====

Sorted By : Signal  
Multiplier: : 1.0000  
Dilution: : 1.0000  
Use Multiplier & Dilution Factor with ISTDs

Signal 1: DAD1 A, Sig=230,4 Ref=360,100

| Peak # | RetTime [min] | Type | Width [min] | Area [mAU*s] | Height [mAU] | Area %  |
|--------|---------------|------|-------------|--------------|--------------|---------|
| 1      | 5.801         | BB   | 0.4174      | 3429.30518   | 122.96570    | 94.3171 |
| 2      | 7.730         | BV   | 0.6115      | 206.62518    | 3.99417      | 5.6829  |

Totals : 3635.93036 126.95987

Signal 2: DAD1 B, Sig=254,8 Ref=360,100

| Peak # | RetTime [min] | Type | Width [min] | Area [mAU*s] | Height [mAU] | Area %  |
|--------|---------------|------|-------------|--------------|--------------|---------|
| 1      | 5.806         | BB   | 0.4247      | 800.18469    | 28.75187     | 93.2555 |
| 2      | 7.700         | MM   | 0.9159      | 57.87141     | 1.05308      | 6.7445  |

Totals : 858.05611 29.80495

Signal 3: DAD1 C, Sig=210,8 Ref=360,100

| Peak # | RetTime [min] | Type | Width [min] | Area [mAU*s] | Height [mAU] | Area %  |
|--------|---------------|------|-------------|--------------|--------------|---------|
| 1      | 5.803         | VB   | 0.4382      | 2.65956e4    | 922.94476    | 91.7787 |
| 2      | 7.718         | BB   | 0.7753      | 2382.35229   | 36.89408     | 8.2213  |

Totals : 2.89779e4 959.83884

Signal 4: DAD1 D, Sig=220,4 Ref=360,100

| Peak # | RetTime [min] | Type | Width [min] | Area [mAU*s] | Height [mAU] | Area %  |
|--------|---------------|------|-------------|--------------|--------------|---------|
| 1      | 5.803         | BB   | 0.4358      | 1.62650e4    | 568.52838    | 91.7705 |
| 2      | 7.722         | BB   | 0.7831      | 1458.55127   | 22.47524     | 8.2295  |



S63

=====  
Area Percent Report  
=====

Sorted By : Signal  
Multiplier: : 1.0000  
Dilution: : 1.0000  
Use Multiplier & Dilution Factor with ISTDs

Signal 1: DAD1 A, Sig=230,4 Ref=360,100

| Peak # | RetTime [min] | Type | Width [min] | Area [mAU*s] | Height [mAU] | Area %  |
|--------|---------------|------|-------------|--------------|--------------|---------|
| 1      | 4.697         | VV   | 0.2393      | 2973.19531   | 193.43083    | 51.5631 |
| 2      | 6.105         | FM   | 0.2809      | 2792.93506   | 165.68793    | 48.4369 |

Totals : 5766.13037 359.11876

Signal 2: DAD1 B, Sig=254,8 Ref=360,100

| Peak # | RetTime [min] | Type | Width [min] | Area [mAU*s] | Height [mAU] | Area %  |
|--------|---------------|------|-------------|--------------|--------------|---------|
| 1      | 4.698         | VB   | 0.2297      | 1161.28479   | 78.92053     | 51.1662 |
| 2      | 6.105         | BB   | 0.2534      | 1108.34595   | 68.27782     | 48.8338 |

Totals : 2269.63074 147.19835

Signal 3: DAD1 C, Sig=210,8 Ref=360,100

| Peak # | RetTime [min] | Type | Width [min] | Area [mAU*s] | Height [mAU] | Area %  |
|--------|---------------|------|-------------|--------------|--------------|---------|
| 1      | 4.697         | VV   | 0.2417      | 1.71494e4    | 1125.72485   | 51.0349 |
| 2      | 6.105         | FM   | 0.2788      | 1.64539e4    | 983.78546    | 48.9651 |

Totals : 3.36033e4 2109.51031

Signal 4: DAD1 D, Sig=220,2 Ref=360,100

| Peak # | RetTime [min] | Type | Width [min] | Area [mAU*s] | Height [mAU] | Area %  |
|--------|---------------|------|-------------|--------------|--------------|---------|
| 1      | 4.697         | VV   | 0.2394      | 7403.91699   | 481.36862    | 51.4347 |
| 2      | 6.105         | FM   | 0.2804      | 6990.87207   | 415.46646    | 48.5653 |





Sample Name: 2-111

## S65

=====  
Area Percent Report  
=====

Sorted By : Signal  
Multiplier: : 1.0000  
Dilution: : 1.0000  
Use Multiplier & Dilution Factor with ISTDs

Signal 1: DAD1 A, Sig=230,4 Ref=360,100

| Peak # | RetTime [min] | Type | Width [min] | Area [mAU*s] | Height [mAU] | Area %  |
|--------|---------------|------|-------------|--------------|--------------|---------|
| 1      | 4.669         | VV   | 0.2041      | 5094.11279   | 390.70959    | 99.7334 |
| 2      | 6.108         | MM   | 0.2387      | 13.61854     | 9.51028e-1   | 0.2666  |

Totals : 5107.73134 391.66062

Signal 2: DAD1 B, Sig=254,8 Ref=360,100

| Peak # | RetTime [min] | Type | Width [min] | Area [mAU*s] | Height [mAU] | Area %  |
|--------|---------------|------|-------------|--------------|--------------|---------|
| 1      | 4.670         | BB   | 0.2042      | 2144.02563   | 164.37088    | 99.7078 |
| 2      | 6.102         | MM   | 0.2547      | 6.28330      | 4.11085e-1   | 0.2922  |

Totals : 2150.30894 164.78197

Signal 3: DAD1 C, Sig=210,8 Ref=360,100

| Peak # | RetTime [min] | Type | Width [min] | Area [mAU*s] | Height [mAU] | Area %  |
|--------|---------------|------|-------------|--------------|--------------|---------|
| 1      | 4.670         | VB   | 0.2388      | 2.70570e4    | 1826.62317   | 99.6580 |
| 2      | 6.104         | BB   | 0.2269      | 92.84227     | 5.73375      | 0.3420  |

Totals : 2.71498e4 1832.35692

Signal 4: DAD1 D, Sig=220,2 Ref=360,100

| Peak # | RetTime [min] | Type | Width [min] | Area [mAU*s] | Height [mAU] | Area %  |
|--------|---------------|------|-------------|--------------|--------------|---------|
| 1      | 4.669         | VV   | 0.2083      | 1.24764e4    | 943.43213    | 99.6851 |
| 2      | 6.083         | BB   | 0.2161      | 39.40620     | 2.18824      | 0.3149  |

Sample Name: 2-98RAC

S66

=====

|                                                                         |                               |
|-------------------------------------------------------------------------|-------------------------------|
| Acq. Operator : SZ                                                      | Seq. Line : 6                 |
| Acq. Instrument : Instrument 1                                          | Location : Vial 63            |
| Injection Date : 8/27/2013 12:04:32 AM                                  | Inj : 1                       |
|                                                                         | Inj Volume : 5 $\mu$ l        |
| Different Inj Volume from Sequence !                                    | Actual Inj Volume : 4 $\mu$ l |
| Acq. Method : C:\CHEM32\1\DATA\ZHU\HPLC 2013-08-26 21-26-12\AD-H03-30.M |                               |
| Last changed : 7/15/2013 8:52:24 PM by SHU                              |                               |
| Analysis Method : C:\CHEM32\1\METHODS\AD-H20-60ETOH.M                   |                               |
| Last changed : 9/6/2013 12:38:52 PM by SZ                               |                               |
| (modified after loading)                                                |                               |

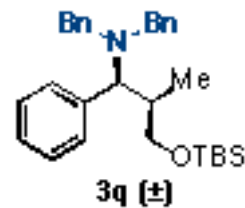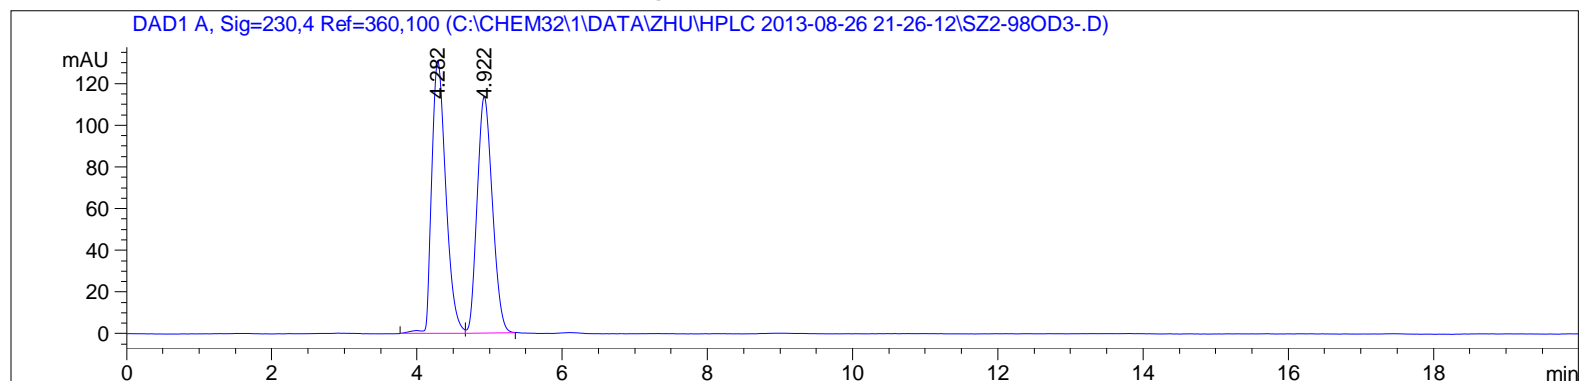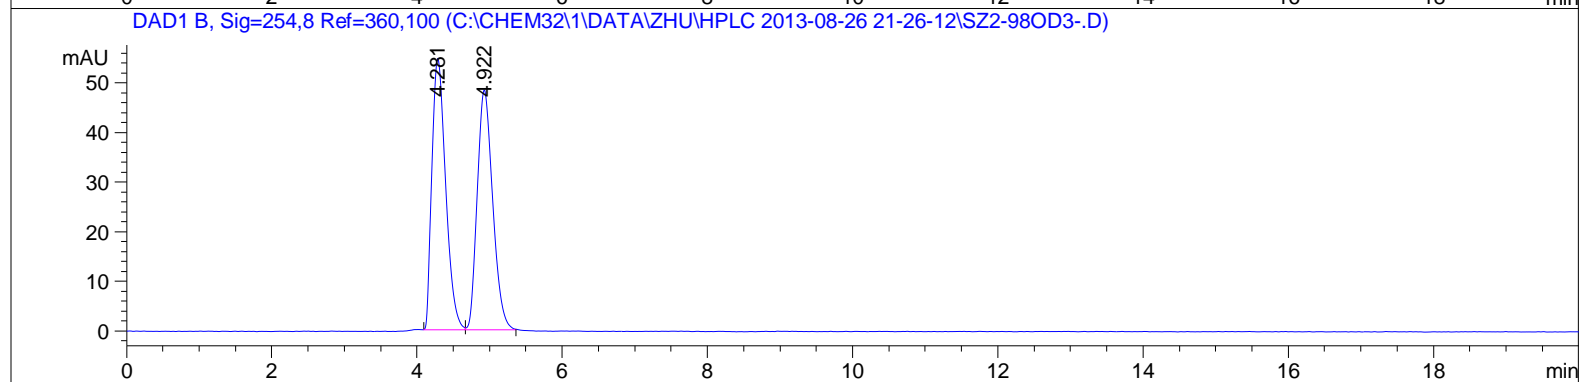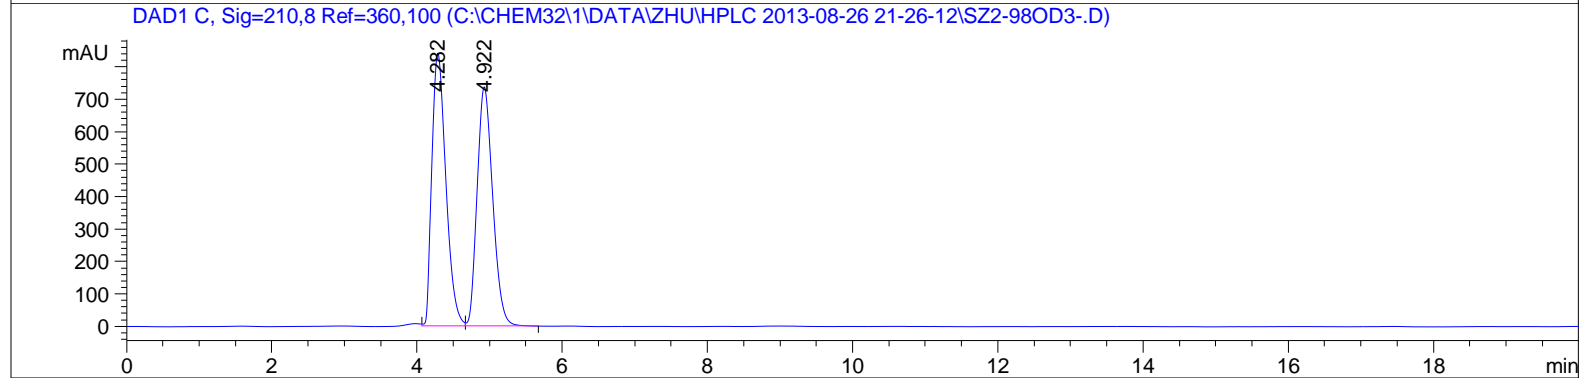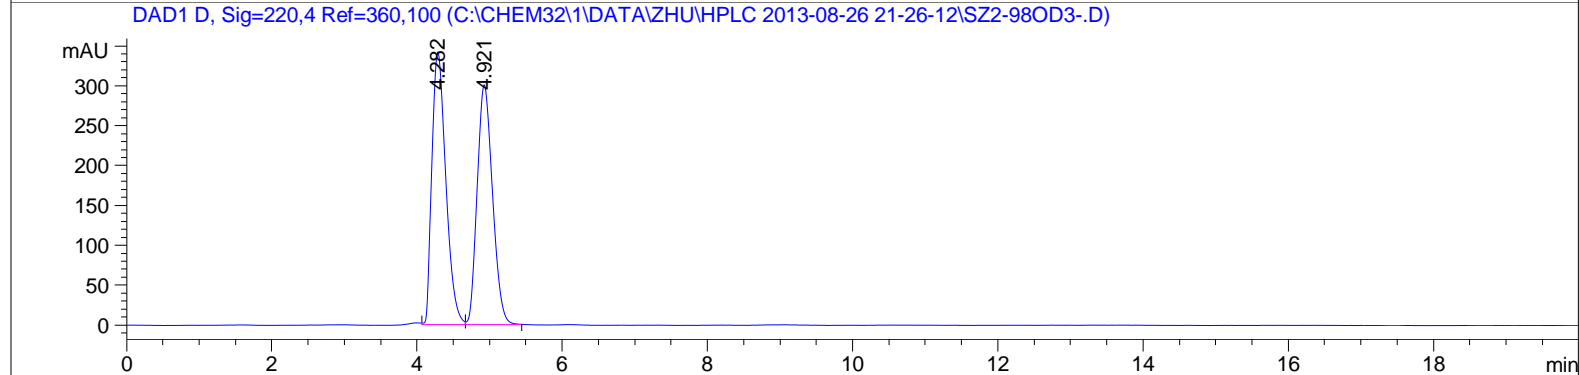

### S67

=====  
Area Percent Report  
=====

Sorted By : Signal  
Multiplier: : 1.0000  
Dilution: : 1.0000  
Use Multiplier & Dilution Factor with ISTDs

Signal 1: DAD1 A, Sig=230,4 Ref=360,100

| Peak # | RetTime [min] | Type | Width [min] | Area [mAU*s] | Height [mAU] | Area %  |
|--------|---------------|------|-------------|--------------|--------------|---------|
| 1      | 4.282         | BV   | 0.2154      | 1765.99536   | 130.86226    | 51.6142 |
| 2      | 4.922         | VB   | 0.2279      | 1655.53296   | 113.65296    | 48.3858 |

Totals : 3421.52832 244.51522

Signal 2: DAD1 B, Sig=254,8 Ref=360,100

| Peak # | RetTime [min] | Type | Width [min] | Area [mAU*s] | Height [mAU] | Area %  |
|--------|---------------|------|-------------|--------------|--------------|---------|
| 1      | 4.281         | BV   | 0.2121      | 722.25366    | 54.69595     | 50.0921 |
| 2      | 4.922         | VB   | 0.2314      | 719.59875    | 48.42576     | 49.9079 |

Totals : 1441.85242 103.12171

Signal 3: DAD1 C, Sig=210,8 Ref=360,100

| Peak # | RetTime [min] | Type | Width [min] | Area [mAU*s] | Height [mAU] | Area %  |
|--------|---------------|------|-------------|--------------|--------------|---------|
| 1      | 4.282         | VV   | 0.2170      | 1.13224e4    | 841.63110    | 50.5276 |
| 2      | 4.922         | VB   | 0.2345      | 1.10305e4    | 737.52417    | 49.2248 |
| 3      | 25.177        | BV   | 0.3053      | 55.49107     | 2.16320      | 0.2476  |

Totals : 2.24084e4 1581.31847

Signal 4: DAD1 D, Sig=220,4 Ref=360,100

Sample Name: 2-109

S68

=====

|                                                                         |                          |
|-------------------------------------------------------------------------|--------------------------|
| Acq. Operator : SZ                                                      | Seq. Line : 2            |
| Acq. Instrument : Instrument 1                                          | Location : Vial 61       |
| Injection Date : 8/26/2013 9:58:55 PM                                   | Inj : 1                  |
|                                                                         | Inj Volume : 5 µl        |
| Different Inj Volume from Sequence !                                    | Actual Inj Volume : 4 µl |
| Acq. Method : C:\CHEM32\1\DATA\ZHU\HPLC 2013-08-26 21-26-12\AD-H03-30.M |                          |
| Last changed : 7/15/2013 8:52:24 PM by SHU                              |                          |
| Analysis Method : C:\CHEM32\1\METHODS\AD-H20-60ETOH.M                   |                          |
| Last changed : 9/6/2013 12:38:52 PM by SZ                               |                          |

(modified after loading)

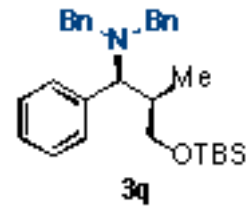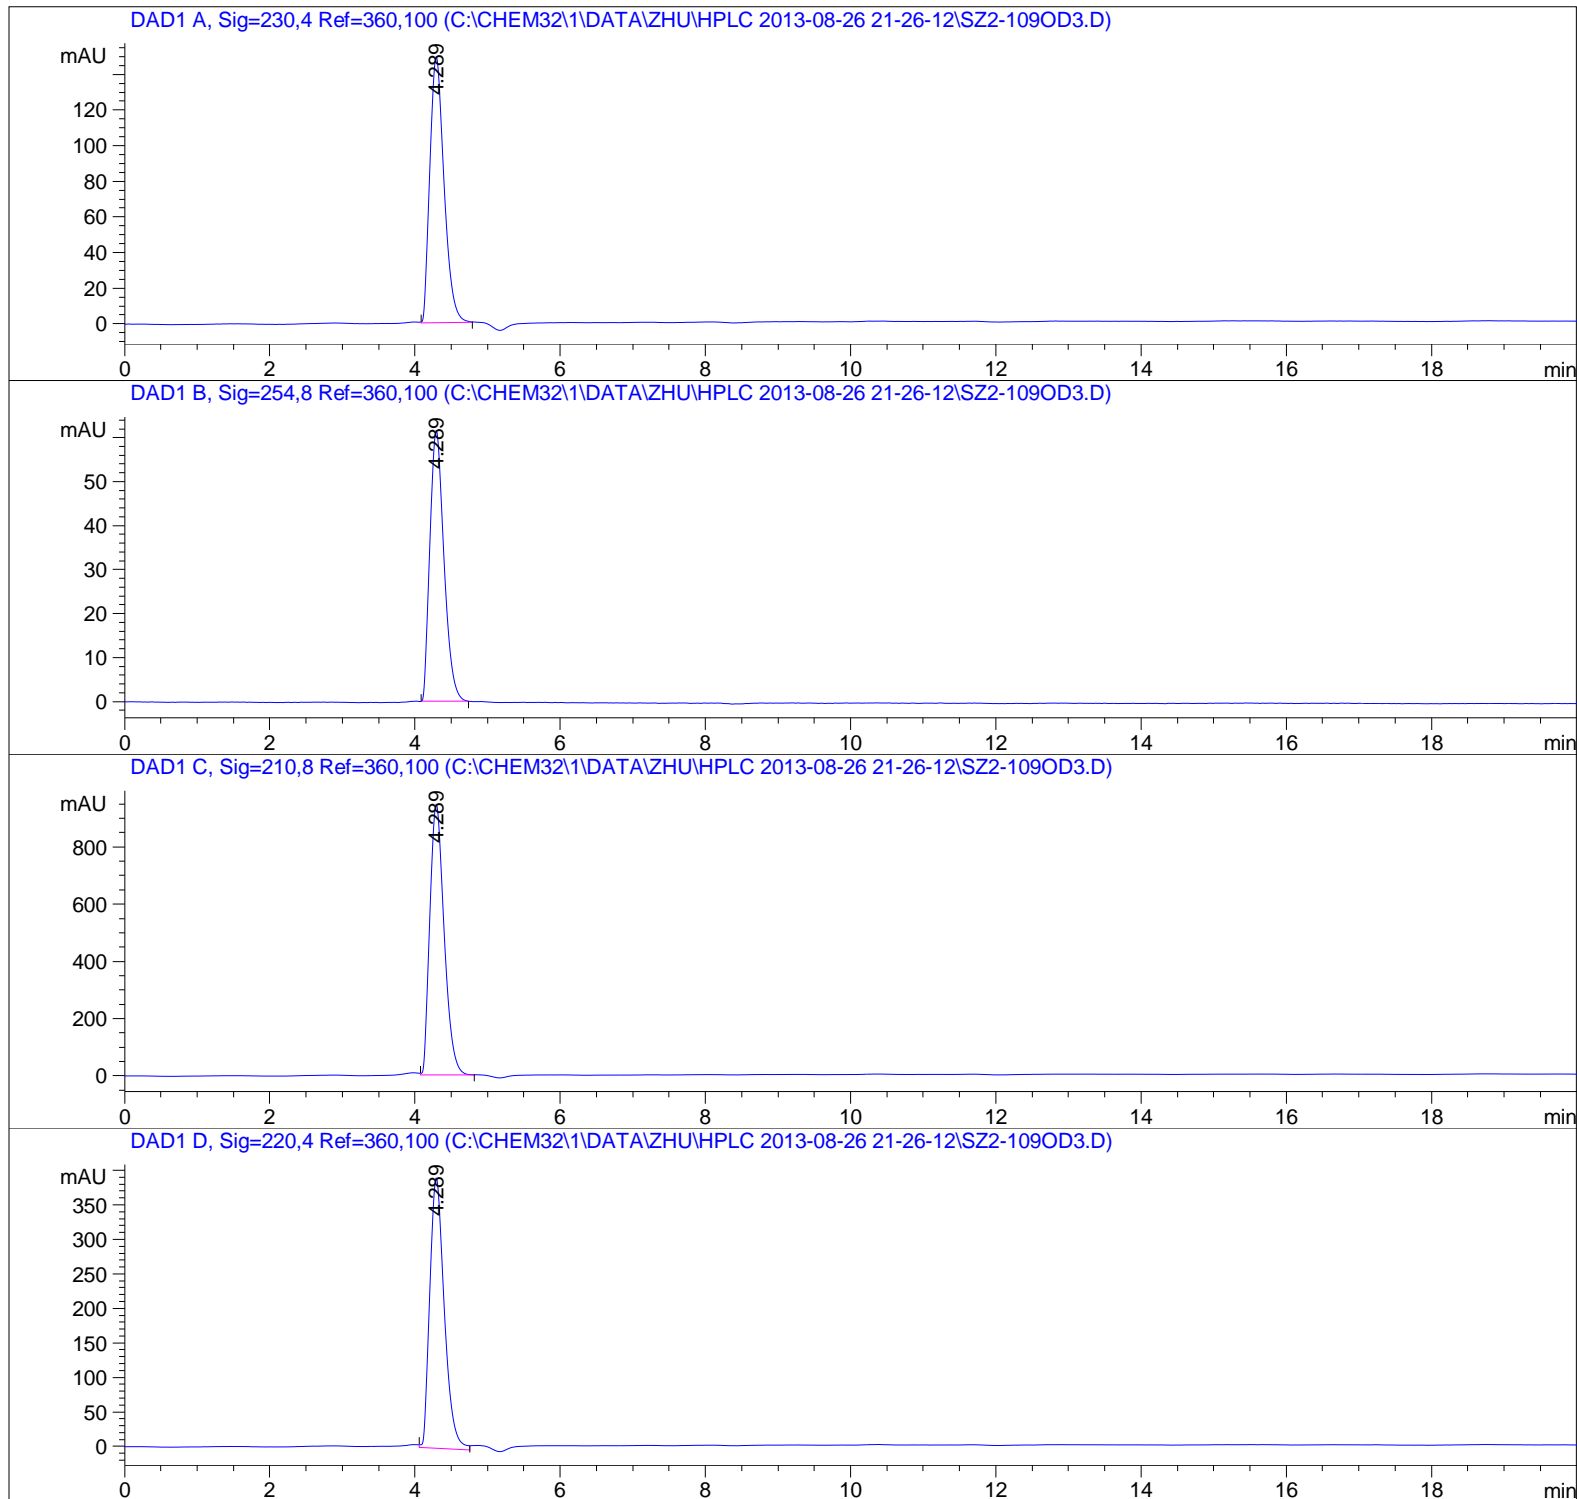

S69

=====  
Area Percent Report  
=====

Sorted By : Signal  
Multiplier: : 1.0000  
Dilution: : 1.0000  
Use Multiplier & Dilution Factor with ISTDs

Signal 1: DAD1 A, Sig=230,4 Ref=360,100

| Peak # | RetTime [min] | Type | Width [min] | Area [mAU*s] | Height [mAU] | Area %   |
|--------|---------------|------|-------------|--------------|--------------|----------|
| 1      | 4.289         | BB   | 0.2107      | 2030.43677   | 149.31010    | 100.0000 |

Totals : 2030.43677 149.31010

Signal 2: DAD1 B, Sig=254,8 Ref=360,100

| Peak # | RetTime [min] | Type | Width [min] | Area [mAU*s] | Height [mAU] | Area %   |
|--------|---------------|------|-------------|--------------|--------------|----------|
| 1      | 4.289         | BB   | 0.2092      | 830.18610    | 61.60786     | 100.0000 |

Totals : 830.18610 61.60786

Signal 3: DAD1 C, Sig=210,8 Ref=360,100

| Peak # | RetTime [min] | Type | Width [min] | Area [mAU*s] | Height [mAU] | Area %   |
|--------|---------------|------|-------------|--------------|--------------|----------|
| 1      | 4.289         | VB   | 0.2143      | 1.30240e4    | 947.98413    | 100.0000 |

Totals : 1.30240e4 947.98413

Signal 4: DAD1 D, Sig=220,4 Ref=360,100

| Peak # | RetTime [min] | Type | Width [min] | Area [mAU*s] | Height [mAU] | Area %   |
|--------|---------------|------|-------------|--------------|--------------|----------|
| 1      | 4.289         | VV   | 0.2142      | 5447.15869   | 391.74844    | 100.0000 |

Totals : 5447.15869 391.74844

Sample Name: 1-16

S70

```

=====
Acq. Operator   : RZ                      Seq. Line :    2
Acq. Instrument : Chiral C 6850 C          Location  : Vial 7
Injection Date  : 06-Sep-13, 08:48:11     Inj       :    1
                                           Inj Volume: 1 µl

Acq. Method     : C:\CHEM32\2\METHODS\SZ100-125 05.M
Last changed    : 6/18/2013 1:35:53 PM by SHU
Analysis Method : C:\CHEM32\2\METHODS\RZ-70-180-1H.M
Last changed    : 9/6/2013 11:36:59 AM by SHU
                 modified after loading
Method Info     : chirasil-de
=====

```

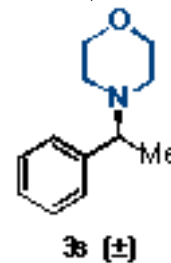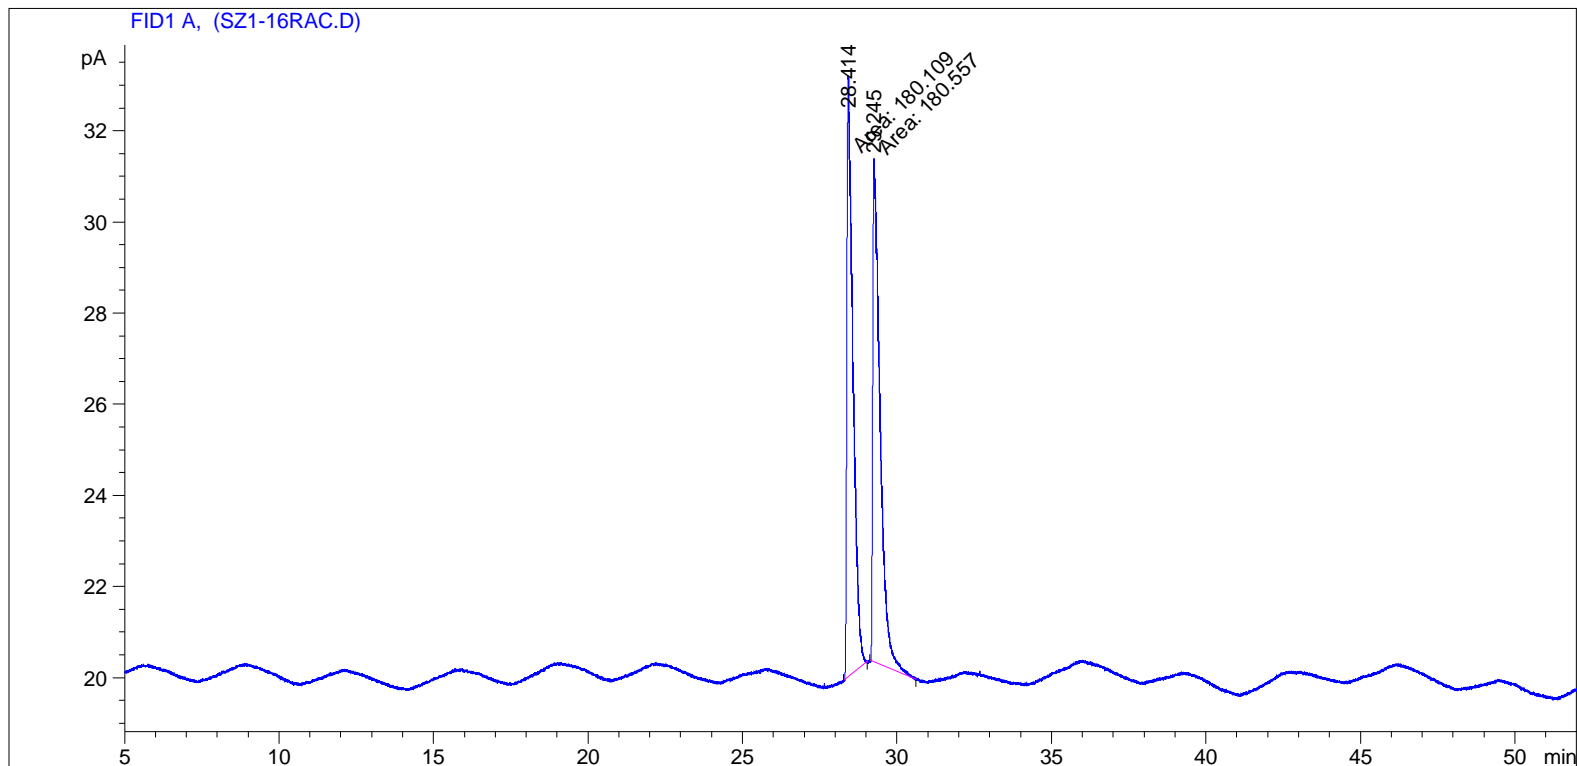

```

=====
                          Area Percent Report
=====

```

```

Sorted By      :      Signal
Multiplier:    :      1.0000
Dilution:      :      1.0000
Use Multiplier & Dilution Factor with ISTDs

```

Signal 1: FID1 A,

| Peak # | RetTime [min] | Type | Width [min] | Area [pA*s] | Height [pA] | Area %   |
|--------|---------------|------|-------------|-------------|-------------|----------|
| 1      | 28.414        | MM   | 0.2280      | 180.10864   | 13.16769    | 49.93779 |
| 2      | 29.245        | MM   | 0.2727      | 180.55737   | 11.03511    | 50.06221 |

Sample Name: 2-108

S71

```

=====
Acq. Operator   : RZ                               Seq. Line :    1
Acq. Instrument : Chiral C 6850 C                 Location  : Vial 8
Injection Date  : 06-Sep-13, 07:51:57           Inj       :    1
                                                    Inj Volume: 1 µl

Acq. Method     : C:\CHEM32\2\METHODS\SZ100-125 05.M
Last changed    : 6/18/2013 1:35:53 PM by SHU
Analysis Method : C:\CHEM32\2\METHODS\RZ-70-180-1H.M
Last changed    : 9/6/2013 12:25:46 PM by SHU
                modified after loading
Method Info     : chirasil-de
=====

```

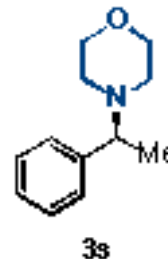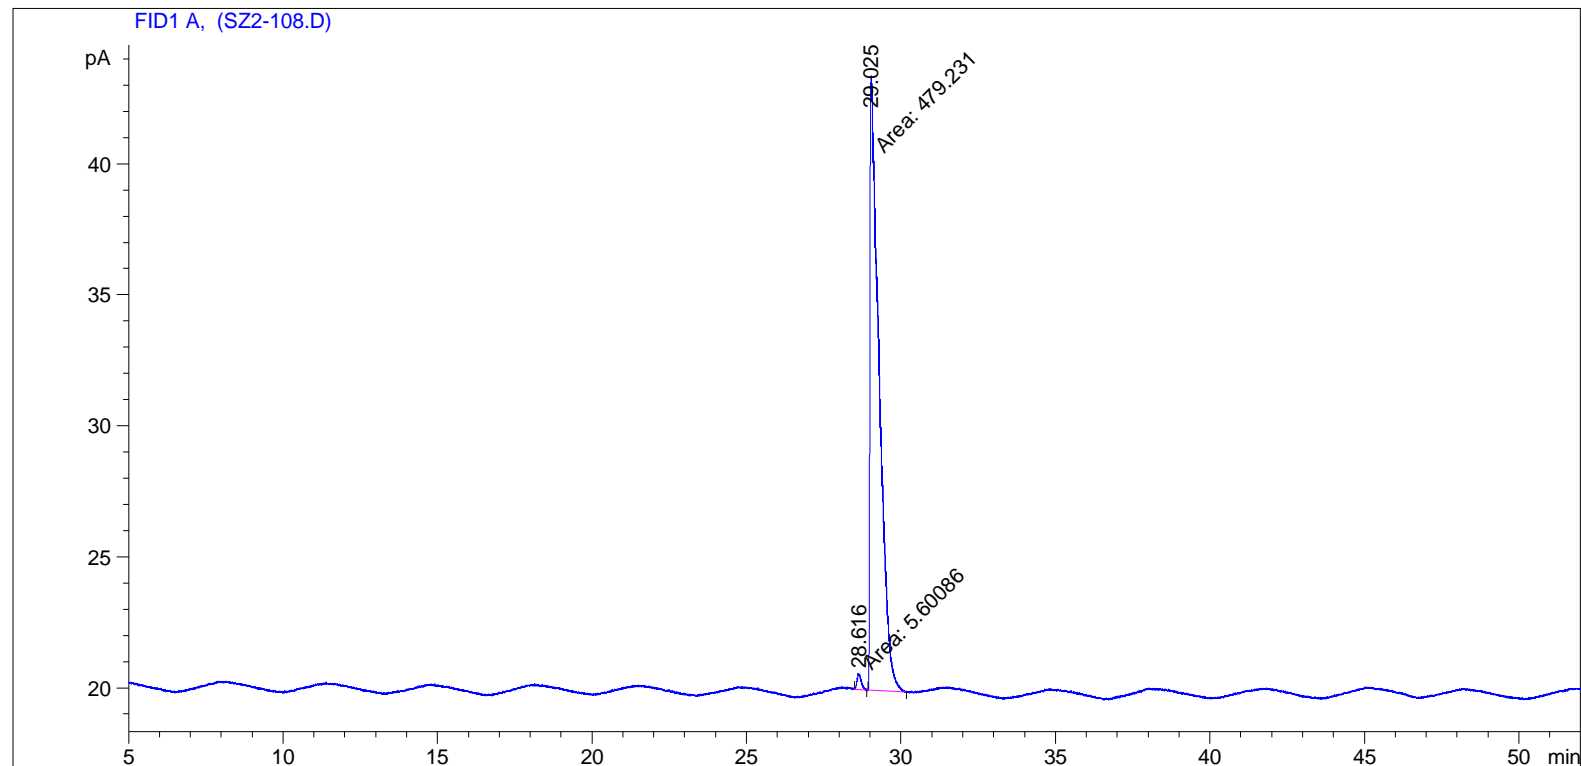

```

=====
                          Area Percent Report
=====

```

```

Sorted By           :      Signal
Multiplier:         :      1.0000
Dilution:          :      1.0000
Use Multiplier & Dilution Factor with ISTDs

```

Signal 1: FID1 A,

| Peak # | RetTime [min] | Type | Width [min] | Area [pA*s] | Height [pA] | Area %   |
|--------|---------------|------|-------------|-------------|-------------|----------|
| 1      | 28.616        | MM   | 0.1567      | 5.60086     | 5.95790e-1  | 1.15522  |
| 2      | 29.025        | MM   | 0.3406      | 479.23148   | 23.44999    | 98.84478 |

Sample Name: 1-270

S72

```

=====
Acq. Operator   : SHU                               Seq. Line :    4
Acq. Instrument : Chiral C 6850 C                   Location  : Vial 8
Injection Date  : 25-Aug-13, 07:24:16              Inj       :    1
                                                    Inj Volume: 1 µl

Acq. Method    : C:\CHEM32\2\METHODS\SZ100-125 05.M
Last changed   : 6/18/2013 1:35:53 PM by SHU
Analysis Method: C:\CHEM32\2\METHODS\RZ-70-180-1H.M
Last changed   : 9/6/2013 12:28:08 PM by SHU
                modified after loading
Method Info    : chirasil-de
=====

```

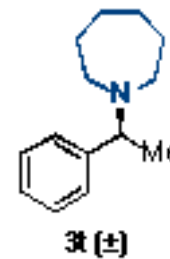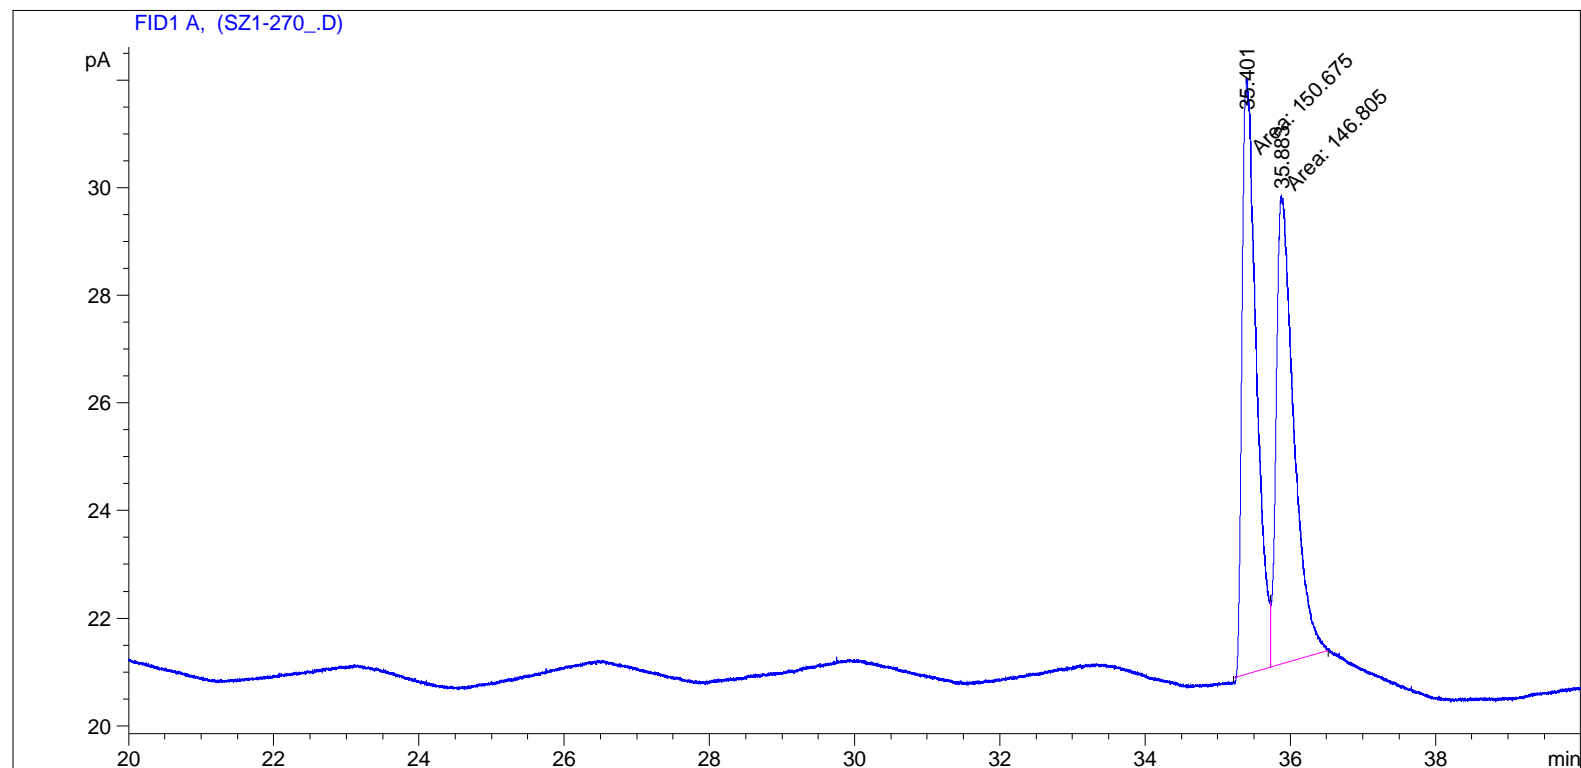

```

=====
                          Area Percent Report
=====

```

```

Sorted By      :      Signal
Multiplier:    :      1.0000
Dilution:      :      1.0000
Use Multiplier & Dilution Factor with ISTDs

```

Signal 1: FID1 A,

| Peak # | RetTime [min] | Type | Width [min] | Area [pA*s] | Height [pA] | Area %   |
|--------|---------------|------|-------------|-------------|-------------|----------|
| 1      | 35.401        | MF   | 0.2269      | 150.67537   | 11.06964    | 50.65056 |
| 2      | 35.883        | FM   | 0.2805      | 146.80479   | 8.72269     | 49.34944 |



S73

```

=====
Acq. Operator   : RZ                               Seq. Line :    2
Acq. Instrument : Chiral C 6850 C                 Location  : Vial 7
Injection Date  : 05-Sep-13, 18:23:48            Inj       :    1
                                                    Inj Volume: 1 µl

Acq. Method     : C:\CHEM32\2\METHODS\SZ100-125 05.M
Last changed    : 6/18/2013 1:35:53 PM by SHU
Analysis Method : C:\CHEM32\2\METHODS\RZ-70-180-1H.M
Last changed    : 9/6/2013 12:25:46 PM by SHU
                  modified after loading
Method Info     : chirasil-de
=====

```

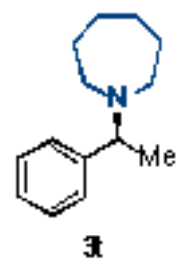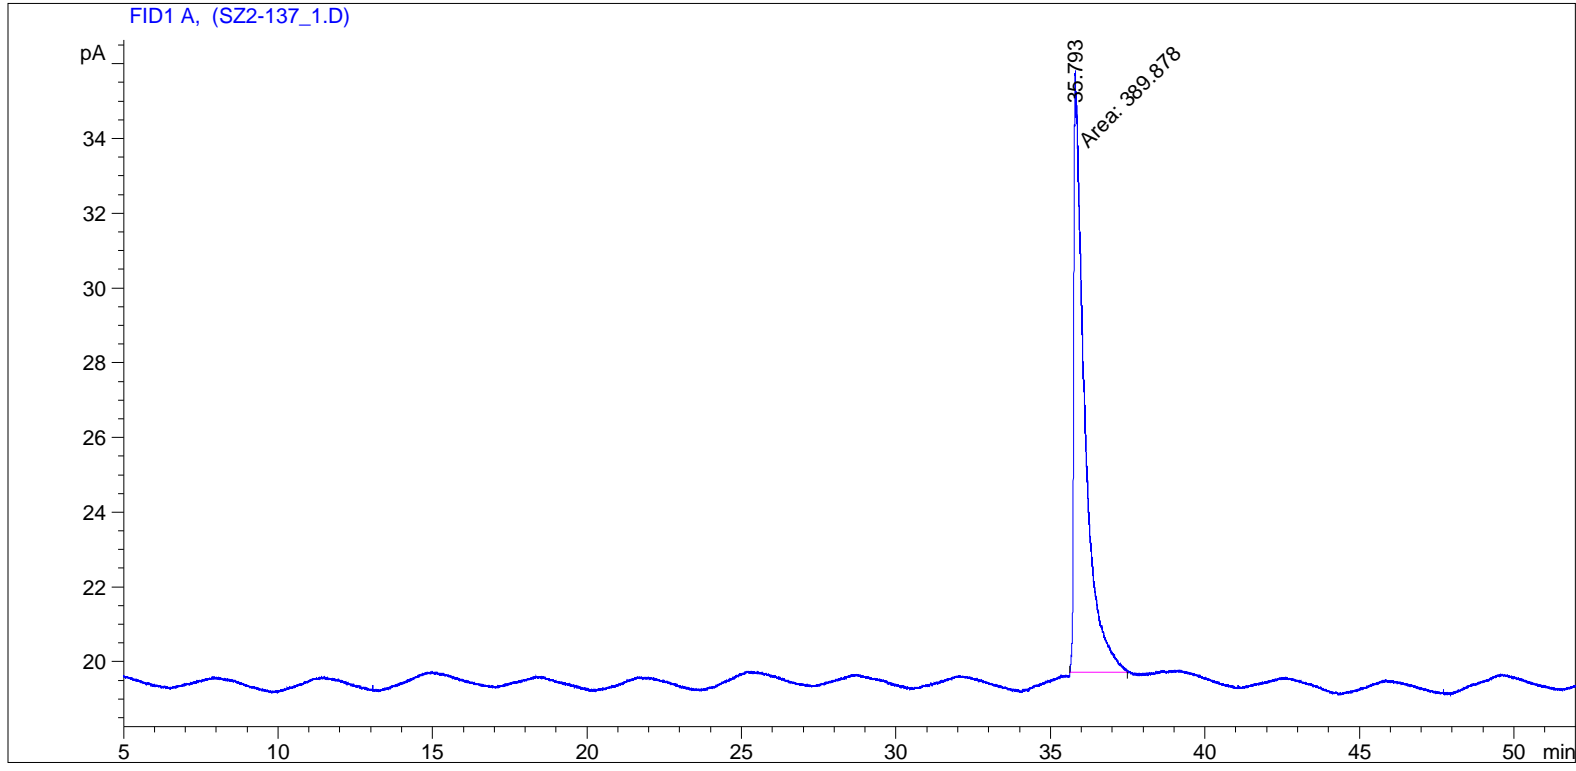

```

=====
                          Area Percent Report
=====

```

```

Sorted By      :      Signal
Multiplier:    :      1.0000
Dilution:      :      1.0000
Use Multiplier & Dilution Factor with ISTDs

```

Signal 1: FID1 A,

| Peak # | RetTime [min] | Type | Width [min] | Area [pA*s] | Height [pA] | Area %  |
|--------|---------------|------|-------------|-------------|-------------|---------|
| 1      | 35.793        | MM   | 0.4050      | 389.87814   | 16.04535    | 1.000e2 |
